# Supplementary material for: Widespread Shortening of 3’ Untranslated Regions and Increased Exon Inclusion Are Evolutionarily Conserved Features of Innate Immune Responses to Infection
Source: PubMed Central journal article supplement (PMC5045211; doi:10.1371/journal.pgen.1006338), 2016-09-30
Supplement: pgen.1006338.s002.pdf [file pgen.1006338.s002.pdf]

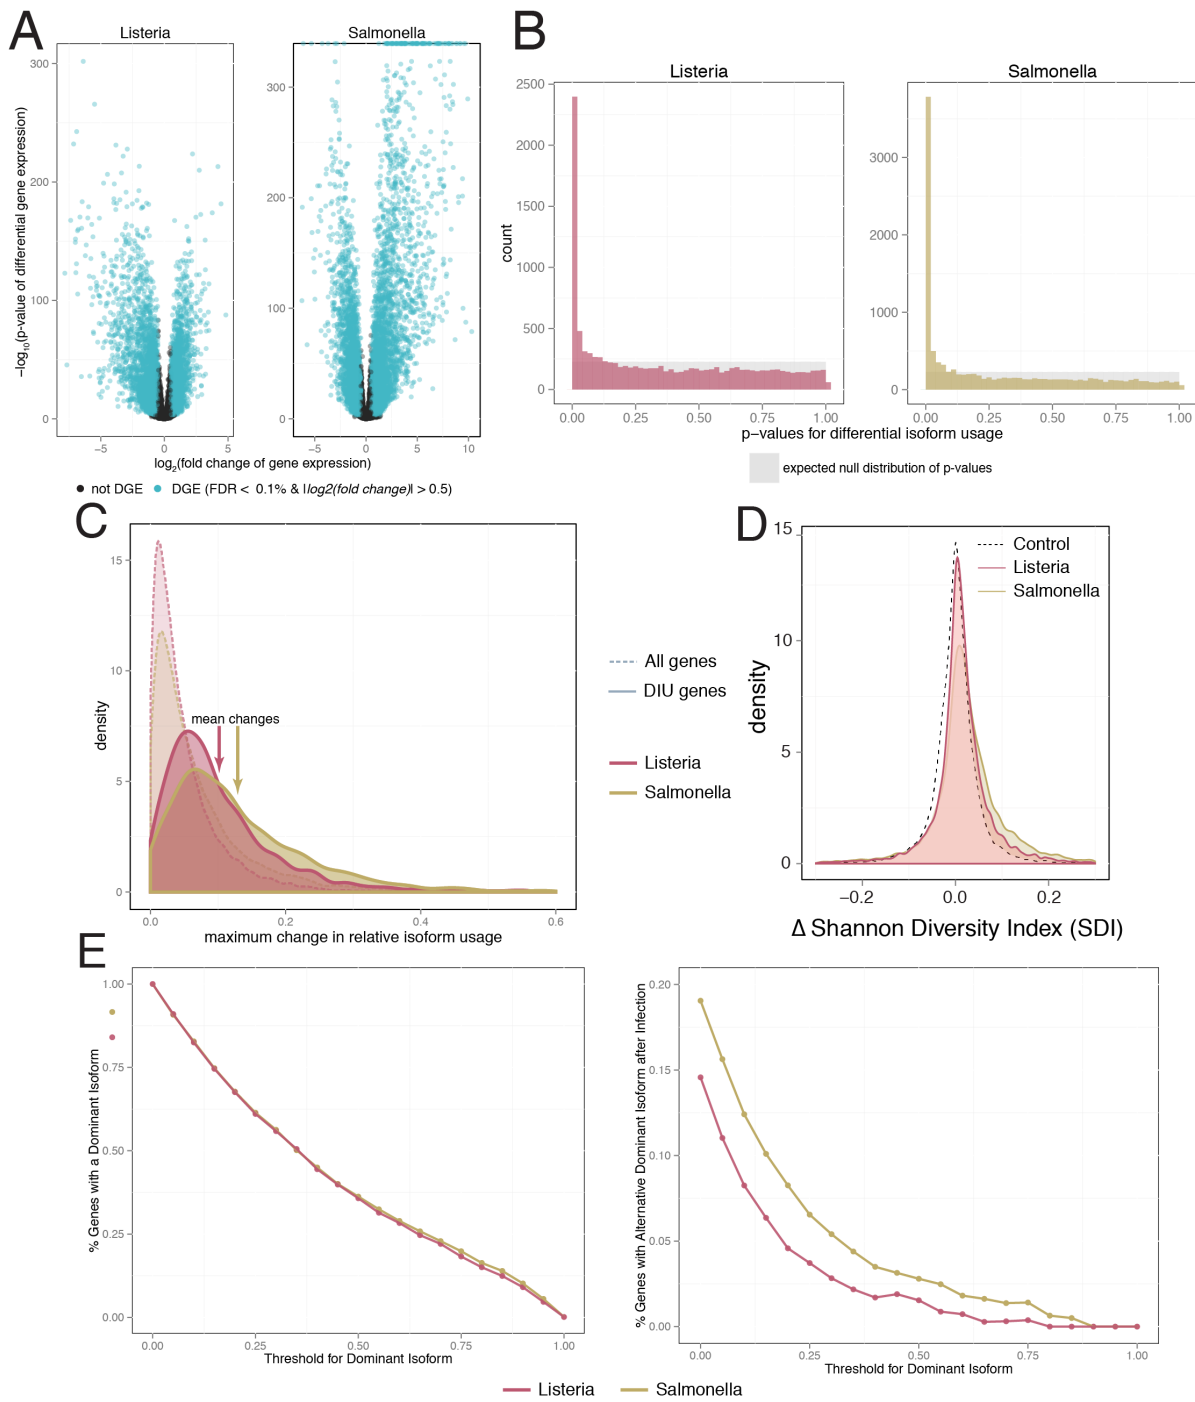

**S1 Fig. Differential isoform usage after infection**
