# Supplementary material for: Widespread Shortening of 3’ Untranslated Regions and Increased Exon Inclusion Are Evolutionarily Conserved Features of Innate Immune Responses to Infection
Source: PubMed Central journal article supplement (PMC5045211; doi:10.1371/journal.pgen.1006338), 2016-09-30
Supplement: pgen.1006338.s012.pdf [file pgen.1006338.s012.pdf]

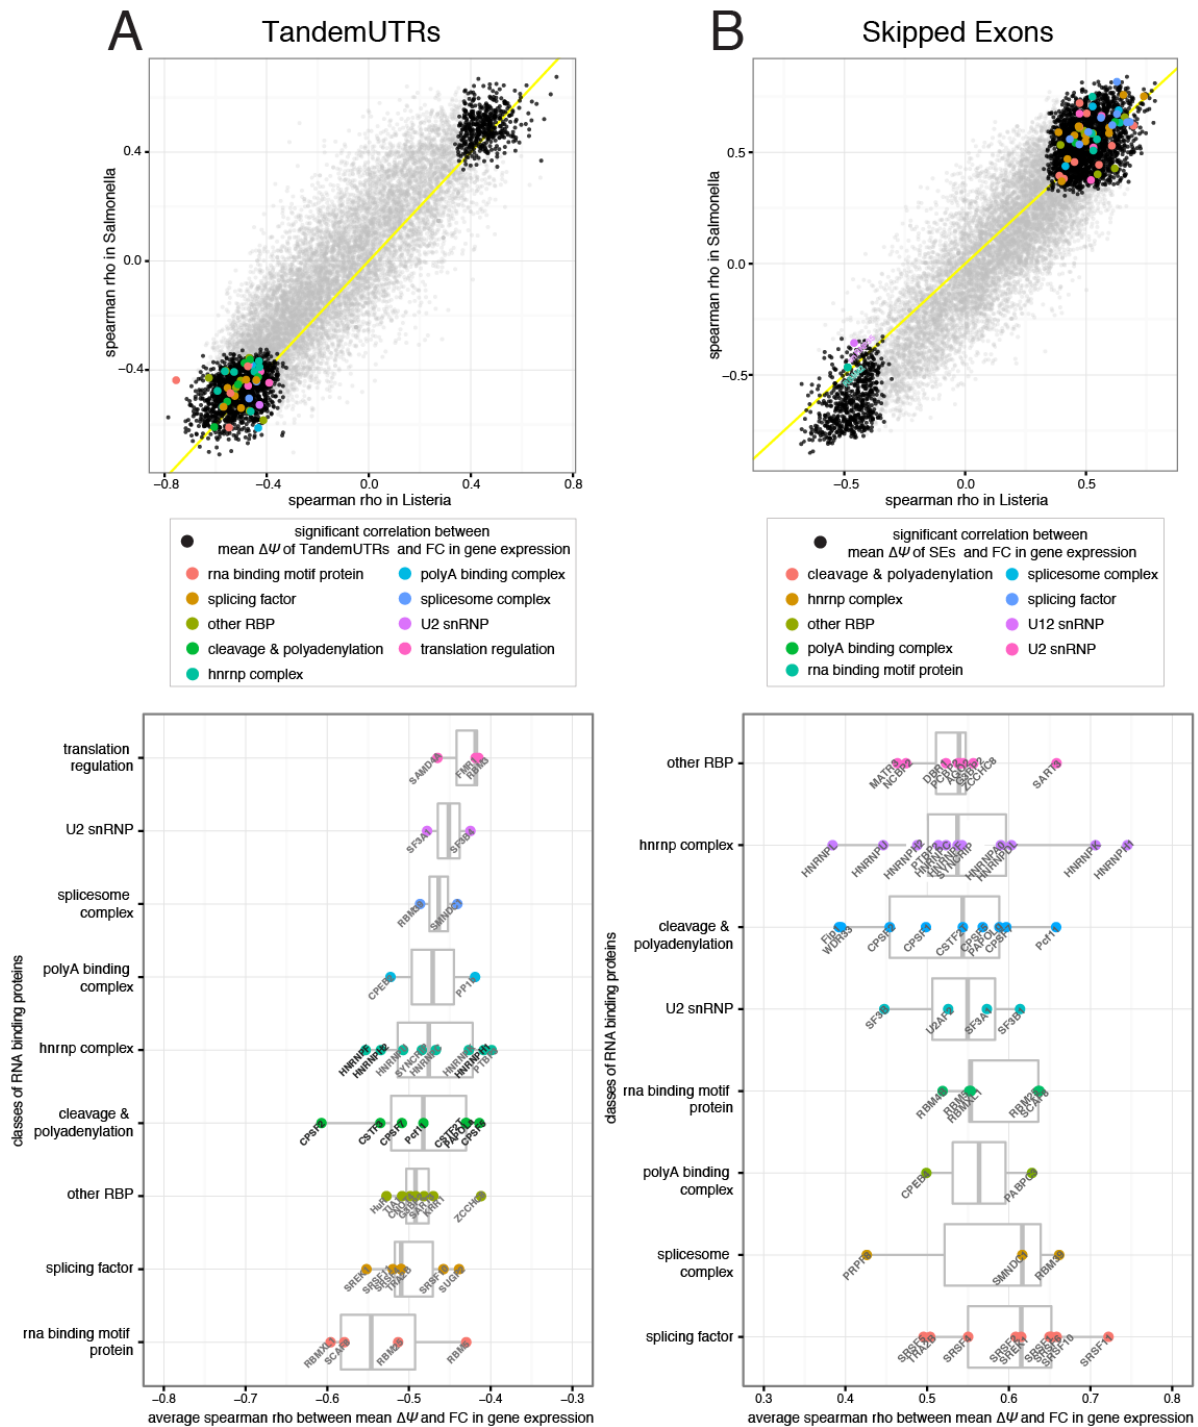

**S11 Fig. Identifying RNA binding factors that might be involved in *trans*-regulation of RNA processing after infection.**
