# Supplementary material for: Widespread Shortening of 3’ Untranslated Regions and Increased Exon Inclusion Are Evolutionarily Conserved Features of Innate Immune Responses to Infection
Source: PLoS Genet. 2016 Sep 30;12(9):e1006338. doi: 10.1371/journal.pgen.1006338 (PMC5045211; doi:10.1371/journal.pgen.1006338)
Supplement: S2 Table — Estimates of differential gene expression for the 14,954 genes tested by DESeq2, as described in Supplementary Section 1.3.2 in S1 Text. Included are the log2 fold change estimates, p-values for differential expression, and Benjamini-Hochberg adjusted p-values for differential expression between non-infected samples and both Listeria and Salmonella samples. (XLSX) [file pgen.1006338.s018.xlsx]

## Sheet: Sheet 1
	Supplementary Table 2 - Gene Level Differential Expression
			Listeria			Salmonella
	Ensembl gene id	HUGO gene id	log2 fold change	p-value	adjusted p-value	log2 fold change	p-value	adjusted p-value
	ENSG00000000419	DPM1	0.451179	2.89038e-25	1.51874e-24	0.196197	3.00143e-06	5.12826e-06
	ENSG00000000457	SCYL3	0.265707	0.0312224	0.0424583	1.50302	1.11187e-31	4.33048e-31
	ENSG00000000460	C1orf112	-0.307478	0.0452266	0.0601132	0.0654444	0.679692	0.70969
	ENSG00000000938	FGR	1.09046	8.83589e-66	1.66567e-64	0.759106	8.21348e-33	3.29332e-32
	ENSG00000000971	CFH	0.155148	0.218459	0.258714	0.685756	4.27614e-08	8.06367e-08
	ENSG00000001036	FUCA2	-0.0846524	0.11777	0.146383	0.119634	0.0327105	0.0414375
	ENSG00000001084	GCLC	-0.407923	0.00049999	0.000828733	-2.76894	2.65447e-117	4.20442e-116
	ENSG00000001167	NFYA	0.468484	1.6605e-14	5.46878e-14	0.742342	3.45007e-30	1.29352e-29
	ENSG00000001460	C1orf201	0.412974	1.54626e-05	2.9431e-05	0.77191	2.93943e-16	7.56201e-16
	ENSG00000001461	NIPAL3	-0.443636	4.23231e-07	9.04744e-07	0.645993	1.06276e-10	2.24886e-10
	ENSG00000001497	LAS1L	-0.0798288	0.278632	0.323616	-0.208029	0.00356914	0.00496796
	ENSG00000001561	ENPP4	0.361758	7.57956e-05	0.00013635	0.326798	0.000466225	0.000693839
	ENSG00000001629	ANKIB1	0.0119628	0.87777	0.896909	0.521963	6.1424e-09	1.20463e-08
	ENSG00000001630	CYP51A1	1.12497	3.30772e-05	6.11665e-05	0.50744	0.0622941	0.0767107
	ENSG00000001631	KRIT1	0.0531122	0.598038	0.64197	0.135624	0.21156	0.243233
	ENSG00000002016	RAD52	-0.361682	2.08395e-07	4.54324e-07	-0.211729	0.00181057	0.00257898
	ENSG00000002330	BAD	-0.830469	1.1215e-11	3.18913e-11	-0.860527	1.62098e-11	3.53205e-11
	ENSG00000002549	LAP3	1.53036	8.53953e-67	1.65359e-65	3.36916	0	0
	ENSG00000002586	CD99	0.0976126	0.110184	0.137698	0.388579	6.27853e-12	1.39241e-11
	ENSG00000002587	HS3ST1	-0.851158	3.11113e-12	9.07834e-12	-1.23746	4.37133e-21	1.29709e-20
	ENSG00000002726	ABP1	0.712634	4.1831e-09	1.01912e-08	1.09731	7.44646e-20	2.12927e-19
	ENSG00000002746	HECW1	-0.22462	0.0210256	0.0293092	-0.390567	0.000201589	0.000308291
	ENSG00000002822	MAD1L1	-0.60155	4.35465e-10	1.12704e-09	-0.243659	0.0171246	0.0223935
	ENSG00000002834	LASP1	-0.684922	6.39713e-12	1.8387e-11	-1.95116	1.3735e-74	1.18914e-73
	ENSG00000002919	SNX11	-0.685101	6.08814e-30	3.76704e-29	-0.69875	1.33919e-21	4.03295e-21
	ENSG00000002933	TMEM176A	-0.0324782	0.865763	0.887096	0.173913	0.369189	0.407178
	ENSG00000003056	M6PR	0.239129	0.0927747	0.117593	0.012606	0.928742	0.937267
	ENSG00000003096	KLHL13	-0.482386	0.00446259	0.00671274	-0.712358	0.00014029	0.000216583
	ENSG00000003137	CYP26B1	-0.0247831	0.783297	0.813895	-0.247464	0.00726604	0.00984967
	ENSG00000003147	ICA1	-0.530986	2.05003e-07	4.47059e-07	-0.517387	1.80213e-07	3.29406e-07
	ENSG00000003393	ALS2	-0.101598	0.0662442	0.0858996	-0.803685	4.82697e-41	2.32366e-40
	ENSG00000003400	CASP10	-0.395179	0.000216457	0.000372319	2.04255	3.70715e-108	5.19487e-107
	ENSG00000003402	CFLAR	2.15116	3.41673e-185	2.55384e-182	3.50309	0	0
	ENSG00000003436	TFPI	0.854351	4.30961e-28	2.499e-27	1.00328	3.23446e-42	1.59241e-41
	ENSG00000003509	C2orf56	-0.136129	0.00251012	0.00387483	-0.537316	1.90175e-24	6.17347e-24
	ENSG00000003756	RBM5	0.161527	1.31956e-05	2.52542e-05	0.243921	1.35939e-10	2.86477e-10
	ENSG00000003987	MTMR7	0.0150779	0.782945	0.813586	-0.311505	7.93234e-07	1.40393e-06
	ENSG00000003989	SLC7A2	-0.042078	0.573261	0.618839	-0.387653	2.57156e-07	4.66795e-07
	ENSG00000004059	ARF5	-0.139896	0.00266187	0.00409808	-0.204423	3.63919e-05	5.84585e-05
	ENSG00000004139	SARM1	-1.13569	1.77536e-10	4.70399e-10	-0.888737	7.02434e-07	1.24751e-06
	ENSG00000004399	PLXND1	-0.704005	1.14905e-22	5.44962e-22	-0.620161	3.10576e-19	8.73211e-19
	ENSG00000004455	AK2	-0.290684	1.99233e-08	4.64857e-08	0.160487	0.0025185	0.0035485
	ENSG00000004468	CD38	0.853341	1.05842e-05	2.03661e-05	5.09759	2.42639e-100	3.03593e-99
	ENSG00000004478	FKBP4	0.0844849	0.2641	0.308078	-0.439015	1.245e-07	2.29505e-07
	ENSG00000004487	KDM1A	0.402939	4.00927e-07	8.59646e-07	0.37883	1.93278e-07	3.52856e-07
	ENSG00000004534	RBM6	0.0555213	0.302467	0.34878	-0.0803753	0.143209	0.168736
	ENSG00000004660	CAMKK1	-0.813558	2.64166e-14	8.61855e-14	-3.7353	3.75931e-151	9.02234e-150
	ENSG00000004700	RECQL	0.0336597	0.726783	0.761739	0.285755	0.00323695	0.00452284
	ENSG00000004766	CCDC132	0.344928	9.43469e-05	0.000168224	0.444536	1.08879e-05	1.80323e-05
	ENSG00000004776	HSPB6	0.239353	0.138011	0.16929	0.887533	1.8471e-07	3.3742e-07
	ENSG00000004777	ARHGAP33	-0.291344	9.77137e-05	0.000173833	-0.558998	5.17584e-14	1.24061e-13
	ENSG00000004779	NDUFAB1	0.0311705	0.714849	0.750757	-0.212648	0.0181347	0.0236419
	ENSG00000004799	PDK4	-2.6005	9.83246e-43	9.56936e-42	-3.01852	2.13587e-58	1.41873e-57
	ENSG00000004809	SLC22A16	-0.0117675	0.900423	0.916236	-0.110799	0.242793	0.276233
	ENSG00000004838	ZMYND10	-1.51199	5.54382e-34	3.9277e-33	-1.95554	9.5234e-41	4.5566e-40
	ENSG00000004846	ABCB5	1.29417	1.28109e-10	3.43207e-10	2.46135	1.09664e-31	4.27227e-31
	ENSG00000004864	SLC25A13	0.717378	8.42094e-47	9.12869e-46	0.663438	1.93603e-21	5.80808e-21
	ENSG00000004866	ST7	-0.0164809	0.769899	0.801534	0.751878	1.53257e-37	6.82604e-37
	ENSG00000004897	CDC27	-0.0500216	0.195919	0.234209	0.301197	1.5291e-11	3.33767e-11
	ENSG00000004961	HCCS	0.0560943	0.0419265	0.0560207	-0.168442	1.33965e-07	2.46347e-07
	ENSG00000004975	DVL2	0.0354216	0.70579	0.742182	0.0615069	0.513403	0.550279
	ENSG00000005001	PRSS22	-0.0143397	0.937691	0.94719	-0.305974	0.0908359	0.109823
	ENSG00000005007	UPF1	-0.00359272	0.945573	0.954061	0.170106	0.00146515	0.0021034
	ENSG00000005020	SKAP2	-0.142079	0.047331	0.0626872	0.127873	0.0862158	0.104516
	ENSG00000005022	SLC25A5	-0.205376	8.75843e-05	0.000156615	-0.340692	1.88573e-08	3.61898e-08
	ENSG00000005059	CCDC109B	-0.283325	2.25981e-05	4.24448e-05	0.367353	4.09759e-08	7.73478e-08
	ENSG00000005075	POLR2J	-0.318176	0.0018671	0.00292325	-0.228827	0.0246177	0.031625
	ENSG00000005100	DHX33	0.0494405	0.4531	0.501993	-0.535338	7.60919e-12	1.68004e-11
	ENSG00000005156	LIG3	-0.0508735	0.570026	0.615925	-0.366501	9.51339e-05	0.00014862
	ENSG00000005175	RPAP3	0.10161	0.0247853	0.0342119	0.442852	6.90405e-21	2.03608e-20
	ENSG00000005189	AC004381.6	0.292497	0.000206697	0.000355939	0.958637	1.95103e-29	7.1887e-29
	ENSG00000005194	CIAPIN1	0.0687568	0.200311	0.239059	-0.19306	0.00198486	0.00281785
	ENSG00000005206	SPPL2B	-0.274198	0.000713959	0.00116581	0.114542	0.196267	0.226644
	ENSG00000005238	FAM214B	-0.254368	5.65144e-06	1.1106e-05	-1.05114	1.55067e-68	1.22223e-67
	ENSG00000005243	COPZ2	-0.138337	0.0995034	0.125314	-0.116467	0.185395	0.214836
	ENSG00000005249	PRKAR2B	0.148736	0.0460465	0.0611159	0.86172	1.64189e-32	6.52393e-32
	ENSG00000005302	MSL3	0.241179	2.00294e-08	4.6726e-08	1.23187	2.00455e-127	3.58947e-126
	ENSG00000005339	CREBBP	0.449541	2.07365e-13	6.45409e-13	0.901751	1.59731e-40	7.61089e-40
	ENSG00000005379	BZRAP1	-0.279167	0.000398117	0.000667278	-0.67963	5.40191e-18	1.4656e-17
	ENSG00000005381	MPO	-0.737357	5.84503e-18	2.26132e-17	-1.17383	9.25268e-38	4.14086e-37
	ENSG00000005436	GCFC2	-0.196068	7.29247e-05	0.000131296	-0.631268	2.0896e-35	8.87607e-35
	ENSG00000005448	WDR54	-0.225492	0.049191	0.0650125	0.0538396	0.638151	0.670623
	ENSG00000005469	CROT	-1.1849	5.40449e-58	8.11976e-57	-1.07639	2.25882e-51	1.31314e-50
	ENSG00000005471	ABCB4	-0.80224	1.67201e-21	7.56047e-21	-1.67576	8.90967e-81	8.45288e-80
	ENSG00000005483	MLL5	0.453525	7.0477e-08	1.58318e-07	1.11202	5.69888e-31	2.17928e-30
	ENSG00000005486	RHBDD2	-0.160471	0.065484	0.0850053	-0.67084	5.14883e-13	1.18786e-12
	ENSG00000005513	SOX8	0.456576	1.25742e-06	2.59594e-06	-0.0841616	0.38205	0.420308
	ENSG00000005700	IBTK	0.71756	7.78785e-67	1.51392e-65	1.31503	3.30611e-148	7.69983e-147
	ENSG00000005801	ZNF195	-0.0449001	0.258287	0.301792	-0.175202	6.48153e-05	0.000102303
	ENSG00000005810	MYCBP2	0.0236606	0.705101	0.741613	0.386316	2.63933e-08	5.03294e-08
	ENSG00000005812	FBXL3	0.264152	5.29252e-07	1.12224e-06	0.757358	1.96168e-39	9.08361e-39
	ENSG00000005844	ITGAL	-1.26136	9.15595e-44	9.1799e-43	-1.17251	4.9358e-36	2.12987e-35
	ENSG00000005882	PDK2	-0.869735	5.71466e-22	2.63262e-21	-0.460564	1.60614e-06	2.78629e-06
	ENSG00000005884	ITGA3	-0.617259	5.34885e-09	1.29511e-08	-0.735253	2.17494e-11	4.7171e-11
	ENSG00000005889	ZFX	0.74643	7.55993e-23	3.61527e-22	1.41431	7.70257e-48	4.23571e-47
	ENSG00000005893	LAMP2	0.149909	0.000138153	0.00024186	0.507298	5.19331e-35	2.18303e-34
	ENSG00000005955	GGNBP2	0.270718	1.65543e-10	4.39478e-10	0.278815	2.59276e-09	5.1786e-09
	ENSG00000006007	GDE1	-1.03468	9.08689e-60	1.4314e-58	-1.24416	2.23543e-78	2.03558e-77
	ENSG00000006015	C19orf60	-0.392654	0.0105218	0.0152237	-0.301233	0.0451773	0.0563473
	ENSG00000006025	OSBPL7	-1.36827	4.6643e-86	1.62913e-84	-2.07129	1.20585e-208	5.18098e-207
	ENSG00000006059	KRT33A	-0.0547098	0.787193	0.817432	-0.338041	0.12183	0.144997
	ENSG00000006062	MAP3K14	-1.75105	4.38016e-120	3.8745e-118	-2.49063	8.22509e-182	2.73901e-180
	ENSG00000006071	ABCC8	-0.59505	1.15117e-16	4.21786e-16	-0.815518	1.81673e-26	6.22465e-26
	ENSG00000006074	CCL18	1.15931	3.48318e-21	1.54786e-20	1.06552	5.58619e-18	1.51395e-17
	ENSG00000006075	CCL3	4.81776	8.03489e-125	8.34122e-123	5.20852	5.13056e-114	7.81979e-113
	ENSG00000006114	SYNRG	-0.046421	0.257279	0.300685	-0.114072	0.00977719	0.0131017
	ENSG00000006118	TMEM132A	0.782854	8.86385e-23	4.22261e-22	-0.0406063	0.661055	0.691873
	ENSG00000006125	AP2B1	0.00118028	0.97319	0.977309	-0.0259025	0.480229	0.518027
	ENSG00000006194	ZNF263	0.392845	1.39691e-10	3.73032e-10	0.372855	2.17911e-09	4.36699e-09
	ENSG00000006282	SPATA20	-0.623843	4.52762e-15	1.53477e-14	-0.725037	2.07835e-17	5.53044e-17
	ENSG00000006283	CACNA1G	-0.258902	0.00759897	0.0111665	-0.420024	0.00149924	0.00215007
	ENSG00000006327	TNFRSF12A	-0.67671	9.19494e-11	2.48653e-10	-2.40319	8.22752e-115	1.26692e-113
	ENSG00000006432	MAP3K9	0.195676	0.0821795	0.104946	0.538062	1.66289e-05	2.72626e-05
	ENSG00000006451	RALA	0.21428	0.000754091	0.00122825	-0.157773	0.0212646	0.0275018
	ENSG00000006453	BAIAP2L1	0.777256	3.24573e-05	6.00871e-05	0.000872174	0.996392	0.996792
	ENSG00000006459	JHDM1D	0.827171	2.04827e-23	1.00623e-22	1.38179	2.43038e-56	1.55494e-55
	ENSG00000006468	ETV1	0.247472	3.86218e-07	8.28583e-07	0.324967	1.23363e-11	2.69983e-11
	ENSG00000006530	AGK	-0.310205	6.93411e-08	1.55874e-07	-0.383653	1.96574e-09	3.94521e-09
	ENSG00000006576	PHTF2	-0.111654	0.0587182	0.0767825	-0.380671	4.36141e-07	7.82761e-07
	ENSG00000006607	FARP2	-0.157365	0.00355778	0.00540445	-0.253107	2.90722e-05	4.6973e-05
	ENSG00000006625	GGCT	0.204592	0.0177858	0.0250075	1.76855	3.66072e-55	2.2873e-54
	ENSG00000006634	DBF4	-0.503341	2.62401e-13	8.12979e-13	-0.89725	6.08217e-20	1.74383e-19
	ENSG00000006652	IFRD1	1.13524	7.0438e-36	5.33694e-35	1.2994	2.12914e-41	1.03326e-40
	ENSG00000006659	LGALS14	1.00308	2.93477e-07	6.33988e-07	2.15897	1.23294e-21	3.71521e-21
	ENSG00000006695	COX10	0.386563	2.345e-11	6.56468e-11	0.270381	2.38717e-05	3.87588e-05
	ENSG00000006704	GTF2IRD1	0.477712	1.47709e-19	6.1234e-19	-0.0518277	0.386758	0.42505
	ENSG00000006712	PAF1	-0.0711109	0.38829	0.437155	-0.0686288	0.429657	0.468102
	ENSG00000006715	VPS41	-0.388182	2.94431e-27	1.66406e-26	-0.17182	3.82692e-05	6.13709e-05
	ENSG00000006740	ARHGAP44	0.488913	4.15309e-10	1.07599e-09	0.461167	3.76817e-08	7.13005e-08
	ENSG00000006744	ELAC2	-0.0541789	0.169961	0.205363	-0.341056	3.81645e-13	8.84569e-13
	ENSG00000006747	SCIN	-0.00184388	0.988044	0.99003	-0.0588339	0.683487	0.713303
	ENSG00000006756	ARSD	-0.34344	2.43964e-08	5.65605e-08	-0.0782179	0.204669	0.235709
	ENSG00000006757	PNPLA4	-0.564619	1.4291e-16	5.20683e-16	-0.371239	2.00991e-07	3.66623e-07
	ENSG00000006831	ADIPOR2	0.261776	5.13573e-07	1.09023e-06	-0.278019	2.38568e-06	4.09678e-06
	ENSG00000006837	CDKL3	0.786925	3.41679e-15	1.16429e-14	1.47263	1.01557e-34	4.24633e-34
	ENSG00000007038	PRSS21	-0.474836	0.00149293	0.00236392	-0.200084	0.163705	0.191123
	ENSG00000007047	MARK4	-0.299306	1.71858e-10	4.5592e-10	-0.639551	5.98054e-38	2.68774e-37
	ENSG00000007062	PROM1	-0.0241084	0.861635	0.883381	-0.0651529	0.660858	0.691715
	ENSG00000007080	CCDC124	0.0628409	0.541408	0.588106	0.0626191	0.539644	0.575887
	ENSG00000007129	CEACAM21	-0.037812	0.522418	0.569921	-0.0129348	0.844178	0.861286
	ENSG00000007168	PAFAH1B1	0.167123	1.58839e-16	5.77873e-16	-0.103923	0.000180761	0.000277347
	ENSG00000007171	NOS2	-0.317349	0.122982	0.152292	-0.550493	0.0091735	0.012317
	ENSG00000007174	DNAH9	-0.157407	0.0499109	0.0659173	-0.562341	6.38959e-12	1.41641e-11
	ENSG00000007202	KIAA0100	-0.451484	1.19763e-18	4.77679e-18	-0.739886	1.60197e-39	7.43873e-39
	ENSG00000007216	SLC13A2	-0.000403803	0.998159	0.998359	0.178136	0.298357	0.33441
	ENSG00000007237	GAS7	-0.863328	8.20382e-32	5.4217e-31	-0.492516	1.49127e-17	3.98595e-17
	ENSG00000007255	TRAPPC6A	-0.0879443	0.274359	0.318976	0.230583	0.00578161	0.00789467
	ENSG00000007264	MATK	0.263229	0.120671	0.149602	-0.0968872	0.556362	0.592375
	ENSG00000007306	CEACAM7	-0.529709	9.74233e-05	0.000173399	-1.41703	7.7539e-22	2.35117e-21
	ENSG00000007341	ST7L	0.72581	1.14235e-31	7.50304e-31	1.18242	3.96608e-55	2.47499e-54
	ENSG00000007350	TKTL1	2.5325	5.72831e-26	3.08697e-25	6.0106	6.68404e-128	1.20264e-126
	ENSG00000007372	PAX6	0.0868345	0.329601	0.377304	1.08256	2.85022e-20	8.27023e-20
	ENSG00000007376	RPUSD1	-0.713766	4.73303e-21	2.09022e-20	-0.843721	1.79437e-17	4.78413e-17
	ENSG00000007384	RHBDF1	0.701109	1.31274e-18	5.22059e-18	0.315258	0.000341521	0.000513053
	ENSG00000007392	LUC7L	0.61641	5.60846e-18	2.17261e-17	0.498704	5.27397e-12	1.17189e-11
	ENSG00000007402	CACNA2D2	0.923213	4.36106e-41	3.96554e-40	0.683939	6.65981e-22	2.02311e-21
	ENSG00000007516	BAIAP3	0.733599	2.28077e-13	7.08987e-13	0.0721702	0.529614	0.566154
	ENSG00000007520	C16orf42	-0.0422919	0.693124	0.731022	-0.6698	6.10415e-09	1.19729e-08
	ENSG00000007541	PIGQ	-0.436849	5.04983e-14	1.62694e-13	-0.429577	2.77952e-11	6.00136e-11
	ENSG00000007545	CRAMP1L	0.35834	1.6137e-12	4.78066e-12	0.291705	5.76102e-07	1.02766e-06
	ENSG00000007908	SELE	-0.0956037	0.529201	0.576227	1.53801	1.14312e-19	3.25065e-19
	ENSG00000007923	DNAJC11	0.02343	0.839777	0.863697	-0.223772	0.0697423	0.0854043
	ENSG00000007933	FMO3	1.18137	2.80843e-27	1.58907e-26	0.731975	1.41227e-09	2.8524e-09
	ENSG00000007944	MYLIP	0.483356	0.000548358	0.000904691	0.527599	0.000146903	0.000226559
	ENSG00000007952	NOX1	-0.937296	5.51729e-10	1.41788e-09	-1.48321	3.18713e-16	8.19077e-16
	ENSG00000007968	E2F2	-1.6355	1.9334e-10	5.11093e-10	-2.64336	4.4908e-24	1.44246e-23
	ENSG00000008018	PSMB1	0.263909	0.0108292	0.0156487	0.149506	0.144198	0.169821
	ENSG00000008056	SYN1	0.39652	3.47077e-07	7.47078e-07	1.31987	1.43752e-58	9.57833e-58
	ENSG00000008083	JARID2	0.888142	1.60217e-42	1.54223e-41	1.00735	3.2766e-36	1.42046e-35
	ENSG00000008118	CAMK1G	0.468599	6.87989e-08	1.54704e-07	2.22177	7.81414e-113	1.17424e-111
	ENSG00000008128	CDK11A	0.0472547	0.443421	0.492365	0.0918229	0.147218	0.173174
	ENSG00000008130	NADK	0.18037	0.00772598	0.0113431	1.22812	7.35839e-73	6.19846e-72
	ENSG00000008226	DLEC1	-0.109563	0.397122	0.445756	-0.333032	0.0108887	0.0145274
	ENSG00000008256	CYTH3	0.333686	1.30871e-06	2.69772e-06	0.366466	1.19618e-06	2.09355e-06
	ENSG00000008277	ADAM22	0.266806	0.0557029	0.0731083	-0.209927	0.161278	0.188452
	ENSG00000008282	SYPL1	0.102482	0.00380964	0.00577005	0.00356401	0.930608	0.93896
	ENSG00000008283	CYB561	0.32975	2.48401e-07	5.38791e-07	0.0807885	0.153457	0.179988
	ENSG00000008294	SPAG9	1.08988	1.53203e-90	5.98398e-89	1.42962	8.47948e-105	1.12698e-103
	ENSG00000008300	CELSR3	0.633098	8.48021e-58	1.26644e-56	0.997978	3.83865e-112	5.70532e-111
	ENSG00000008311	AASS	0.104099	0.540073	0.586911	0.903892	3.26495e-07	5.89085e-07
	ENSG00000008323	PLEKHG6	-0.131984	0.31859	0.365819	0.0514191	0.666384	0.697011
	ENSG00000008324	SS18L2	0.0724275	0.497164	0.545716	0.0172465	0.877786	0.891742
	ENSG00000008382	MPND	-0.633564	1.93607e-28	1.13901e-27	-0.596666	5.00671e-21	1.48297e-20
	ENSG00000008394	MGST1	0.804316	1.30294e-20	5.6539e-20	0.192611	0.0198608	0.0257888
	ENSG00000008405	CRY1	1.06753	6.76638e-61	1.10668e-59	0.47025	3.12192e-10	6.48499e-10
	ENSG00000008438	PGLYRP1	-0.0590312	0.460626	0.509463	0.0871534	0.317241	0.35372
	ENSG00000008441	NFIX	-1.62206	3.88352e-64	6.92777e-63	-0.316683	0.0149882	0.0197239
	ENSG00000008513	ST3GAL1	0.755614	6.40772e-12	1.84139e-11	0.295293	0.00843806	0.0113663
	ENSG00000008516	MMP25	-0.856831	7.05323e-12	2.02222e-11	-0.278039	0.0248972	0.0319628
	ENSG00000008517	IL32	1.01128	9.56327e-17	3.51688e-16	1.24159	1.49301e-22	4.61228e-22
	ENSG00000008710	PKD1	-0.371113	5.20181e-07	1.10394e-06	-0.59178	1.6197e-16	4.19717e-16
	ENSG00000008735	MAPK8IP2	0.742904	1.88977e-19	7.80176e-19	0.169749	0.0373148	0.0469877
	ENSG00000008838	MED24	-0.427568	3.50844e-45	3.67475e-44	-0.487448	1.60704e-43	8.14527e-43
	ENSG00000008853	RHOBTB2	-1.71345	8.54977e-66	1.61377e-64	-2.54597	3.63021e-144	8.00573e-143
	ENSG00000008869	HEATR5B	-0.287369	0.00081542	0.00132411	0.0116669	0.896187	0.907599
	ENSG00000008952	SEC62	0.377199	1.95196e-12	5.75994e-12	-0.176639	0.00122339	0.00176582
	ENSG00000008988	RPS20	0.229653	0.0511153	0.0674068	0.392042	0.000824661	0.00120531
	ENSG00000009307	CSDE1	0.27012	7.74365e-19	3.12189e-18	0.386719	4.13344e-26	1.40207e-25
	ENSG00000009335	UBE3C	0.317961	1.10752e-09	2.80142e-09	0.134306	0.00825454	0.0111301
	ENSG00000009413	REV3L	0.16181	0.134939	0.165793	1.76648	6.54888e-39	2.99996e-38
	ENSG00000009709	PAX7	1.32434	1.93884e-28	1.14019e-27	3.00526	1.98379e-122	3.34027e-121
	ENSG00000009724	MASP2	-0.177993	0.0191786	0.0268698	-0.0779403	0.358011	0.395697
	ENSG00000009765	IYD	-0.165731	0.213995	0.253809	-0.401409	0.00407643	0.00564568
	ENSG00000009780	FAM76A	0.368972	4.62626e-06	9.14668e-06	0.21849	0.0138166	0.0182496
	ENSG00000009790	TRAF3IP3	0.144731	0.0167787	0.0236694	0.00298152	0.963986	0.968781
	ENSG00000009830	POMT2	-0.127054	0.0748513	0.0962043	-0.500772	1.42689e-12	3.24091e-12
	ENSG00000009844	VTA1	-0.139583	4.26212e-06	8.44794e-06	-0.0995787	0.00514321	0.00706424
	ENSG00000009950	MLXIPL	0.157397	0.010773	0.0155765	0.156258	0.0101604	0.013592
	ENSG00000009954	BAZ1B	-0.404922	1.11815e-30	7.1008e-30	-0.6304	6.71311e-39	3.07237e-38
	ENSG00000010017	RANBP9	-0.174589	0.00745891	0.0109747	-0.413773	5.06352e-09	9.98151e-09
	ENSG00000010030	ETV7	4.09338	1.54688e-60	2.49992e-59	8.19637	8.58322e-281	7.41828e-279
	ENSG00000010072	C1orf124	-0.00810981	0.883301	0.901575	-0.0665591	0.283207	0.318576
	ENSG00000010165	METTL13	0.0671457	0.190317	0.228042	-0.497626	1.23403e-14	3.02083e-14
	ENSG00000010219	DYRK4	0.111227	0.154527	0.18793	0.768472	2.04534e-23	6.46826e-23
	ENSG00000010244	ZNF207	0.60281	2.64821e-53	3.43348e-52	0.660082	1.43844e-59	9.78507e-59
	ENSG00000010256	UQCRC1	-0.252323	0.00243181	0.00376093	-0.42988	7.15014e-07	1.26925e-06
	ENSG00000010270	STARD3NL	0.655392	1.09917e-51	1.36361e-50	0.725218	3.13869e-50	1.7967e-49
	ENSG00000010278	CD9	-0.289573	8.51065e-05	0.000152421	-0.364374	1.92837e-06	3.33099e-06
	ENSG00000010282	HHATL	0.0739317	0.632614	0.674148	-0.0718667	0.663435	0.694218
	ENSG00000010292	NCAPD2	-0.601359	5.24465e-21	2.30934e-20	-0.836684	1.28639e-33	5.23804e-33
	ENSG00000010295	IFFO1	-1.56491	1.89508e-132	2.46343e-130	-1.88697	2.13287e-166	5.94976e-165
	ENSG00000010310	GIPR	0.236108	0.0349879	0.0472692	0.628539	1.64883e-06	2.85935e-06
	ENSG00000010318	PHF7	-0.729032	1.08889e-30	6.92081e-30	-1.23879	7.90156e-61	5.49252e-60
	ENSG00000010319	SEMA3G	-0.125354	0.430899	0.480068	-0.681692	7.22547e-05	0.000113733
	ENSG00000010322	NISCH	-1.71297	5.50604e-134	7.55136e-132	-2.03688	1.17283e-137	2.36975e-136
	ENSG00000010327	STAB1	-0.471866	9.70417e-14	3.07542e-13	0.020676	0.73931	0.765789
	ENSG00000010361	FUZ	0.0654302	0.476632	0.525261	1.78052	2.18984e-61	1.53937e-60
	ENSG00000010404	IDS	-0.742934	4.22428e-35	3.12e-34	-0.930141	1.36366e-47	7.47141e-47
	ENSG00000010438	PRSS3	0.957592	2.47386e-05	4.6285e-05	0.774924	0.000696446	0.00102372
	ENSG00000010539	ZNF200	1.0309	5.81836e-50	6.84872e-49	1.98442	1.19525e-256	8.80361e-255
	ENSG00000010610	CD4	-0.0113024	0.833493	0.85806	0.384455	2.50739e-12	5.64276e-12
	ENSG00000010626	LRRC23	-0.357558	5.83907e-05	0.000105842	0.0431213	0.652899	0.684438
	ENSG00000010671	BTK	-0.589196	5.39829e-40	4.72201e-39	-0.378746	1.53934e-11	3.35954e-11
	ENSG00000010704	HFE	-0.487735	1.56151e-10	4.15233e-10	-0.22366	0.00314589	0.00440053
	ENSG00000010803	SCMH1	-0.634685	1.55142e-09	3.88935e-09	-1.03927	1.09142e-24	3.5701e-24
	ENSG00000010810	FYN	0.498045	5.48027e-06	1.07753e-05	-0.552196	3.04857e-06	5.20583e-06
	ENSG00000010818	HIVEP2	3.17136	1.25945e-140	2.16408e-138	4.54881	2.68922e-281	2.33774e-279
	ENSG00000011007	TCEB3	0.1507	0.121621	0.150706	-0.137715	0.21314	0.244842
	ENSG00000011009	LYPLA2	-0.824519	1.50917e-32	1.01992e-31	-1.21959	4.45941e-61	3.11867e-60
	ENSG00000011021	CLCN6	0.146438	0.0735135	0.0945987	0.239288	0.0210919	0.0272943
	ENSG00000011028	MRC2	-1.34346	4.91236e-47	5.36805e-46	-0.279968	0.00125594	0.00181193
	ENSG00000011083	SLC6A7	0.523681	0.0016844	0.00264914	0.397171	0.0721461	0.0882107
	ENSG00000011105	TSPAN9	-0.35303	0.00043859	0.00073175	0.115402	0.218545	0.250665
	ENSG00000011114	BTBD7	1.14959	1.01579e-79	2.9202e-78	1.13607	2.06588e-49	1.17226e-48
	ENSG00000011132	APBA3	0.236869	3.3067e-05	6.11656e-05	-0.0169173	0.771762	0.795326
	ENSG00000011143	MKS1	0.0120621	0.925727	0.937264	-0.0185473	0.889145	0.901413
	ENSG00000011198	ABHD5	0.505456	9.28761e-15	3.09084e-14	0.661465	1.52835e-22	4.7195e-22
	ENSG00000011201	KAL1	-0.704516	4.98647e-07	1.0596e-06	-0.383267	0.00814447	0.0109896
	ENSG00000011243	AKAP8L	0.259788	0.0211834	0.0295154	0.583019	1.77158e-07	3.23981e-07
	ENSG00000011258	MBTD1	0.371738	4.67884e-06	9.2433e-06	0.394144	0.000115628	0.000179511
	ENSG00000011260	UTP18	0.16164	2.71096e-05	5.05692e-05	-0.310932	1.46569e-12	3.327e-12
	ENSG00000011275	RNF216	0.0897482	0.0380033	0.0510983	-0.120693	0.0112455	0.014978
	ENSG00000011295	TTC19	0.0649099	0.304952	0.351374	-0.801755	1.31963e-29	4.8779e-29
	ENSG00000011304	PTBP1	0.4126	1.07073e-18	4.27634e-18	0.211286	3.89346e-05	6.23888e-05
	ENSG00000011332	DPF1	-0.153986	0.0932501	0.118165	0.173598	0.0723899	0.0884799
	ENSG00000011347	SYT7	0.410417	5.16121e-05	9.39654e-05	0.498684	1.52139e-06	2.64478e-06
	ENSG00000011376	LARS2	-0.511423	3.27729e-10	8.54119e-10	-0.95343	6.77467e-33	2.72006e-32
	ENSG00000011405	PIK3C2A	-0.231972	0.00465254	0.00698792	-0.368202	6.08237e-06	1.02184e-05
	ENSG00000011422	PLAUR	2.11334	4.79744e-157	1.35315e-154	2.39945	5.18216e-166	1.43754e-164
	ENSG00000011426	ANLN	-0.158321	0.0420052	0.0561158	0.108124	0.179168	0.208136
	ENSG00000011451	WIZ	0.482773	3.68009e-12	1.07072e-11	0.137561	0.057118	0.0705633
	ENSG00000011454	RABGAP1	-0.11703	0.00242086	0.00374709	-0.212136	2.54986e-07	4.63137e-07
	ENSG00000011465	DCN	0.114142	0.156372	0.190032	0.0516572	0.547309	0.583442
	ENSG00000011478	QPCTL	0.270244	0.00270289	0.00415651	0.29106	0.00144431	0.00207528
	ENSG00000011485	PPP5C	-0.550025	4.84003e-19	1.96827e-18	-0.963112	1.54563e-39	7.18602e-39
	ENSG00000011523	CEP68	0.498864	1.11822e-07	2.47539e-07	0.385469	5.09803e-05	8.10998e-05
	ENSG00000011566	MAP4K3	0.128706	0.0665673	0.0862766	-0.704161	2.7954e-16	7.20013e-16
	ENSG00000011590	ZBTB32	0.681268	2.28208e-05	4.28486e-05	4.96342	4.1638e-105	5.55371e-104
	ENSG00000011600	TYROBP	-0.0309501	0.751267	0.784376	0.190393	0.0491018	0.0610182
	ENSG00000011638	TMEM159	0.381656	4.14389e-07	8.86858e-07	1.14396	1.86247e-44	9.61921e-44
	ENSG00000012048	BRCA1	-1.12792	1.14199e-35	8.60461e-35	-1.30098	1.2985e-42	6.44593e-42
	ENSG00000012061	ERCC1	-0.231756	0.00756329	0.0111174	-0.630427	2.57534e-12	5.78958e-12
	ENSG00000012124	CD22	-0.417473	1.18907e-08	2.81971e-08	-0.424922	1.03072e-08	1.99759e-08
	ENSG00000012171	SEMA3B	-0.150584	0.145611	0.178027	-0.268758	0.0136818	0.0180764
	ENSG00000012174	MBTPS2	0.21639	0.00132847	0.00211494	0.342378	8.89777e-07	1.57108e-06
	ENSG00000012211	PRICKLE3	-0.553257	2.36618e-21	1.06318e-20	-0.882518	4.87618e-34	2.00574e-33
	ENSG00000012223	LTF	0.789468	4.68045e-17	1.74267e-16	-0.184512	0.0711824	0.0870609
	ENSG00000012232	EXTL3	-0.334618	4.1283e-13	1.26076e-12	-0.293483	2.00772e-08	3.84815e-08
	ENSG00000012660	ELOVL5	1.15353	1.9115e-61	3.17853e-60	1.77792	7.92036e-134	1.53401e-132
	ENSG00000012779	ALOX5	-1.83676	3.14987e-42	2.97833e-41	-2.01822	1.4292e-47	7.82474e-47
	ENSG00000012817	KDM5D	-0.0697143	0.368771	0.417475	-0.291052	0.000281795	0.000426415
	ENSG00000012822	CALCOCO1	-0.16702	0.0160617	0.0227051	0.656236	2.21684e-16	5.72672e-16
	ENSG00000012963	UBR7	0.260312	4.82406e-06	9.51634e-06	-0.611842	2.15376e-25	7.1658e-25
	ENSG00000012983	MAP4K5	0.883092	5.72046e-29	3.42061e-28	0.694729	2.92321e-22	8.97122e-22
	ENSG00000013016	EHD3	-0.866427	1.65522e-09	4.14124e-09	-1.15287	1.87976e-12	4.24885e-12
	ENSG00000013275	PSMC4	0.312004	2.15696e-10	5.68384e-10	0.489712	8.42354e-26	2.83477e-25
	ENSG00000013288	MAN2B2	-0.233954	2.35288e-05	4.41043e-05	0.106154	0.0395021	0.0495957
	ENSG00000013293	SLC7A14	0.436519	0.0264787	0.0363914	0.387874	0.0601263	0.0741389
	ENSG00000013297	CLDN11	0.320042	0.00089108	0.00144164	0.263529	0.00931696	0.0125018
	ENSG00000013306	SLC25A39	-0.389921	8.27236e-11	2.24313e-10	-0.739566	5.29266e-29	1.93156e-28
	ENSG00000013364	MVP	0.435282	6.9378e-11	1.89016e-10	0.939309	8.02112e-47	4.32654e-46
	ENSG00000013374	NUB1	0.244879	0.00220946	0.00343374	2.16016	2.44659e-128	4.42874e-127
	ENSG00000013375	PGM3	0.625259	8.05989e-16	2.831e-15	1.38066	4.1079e-53	2.46672e-52
	ENSG00000013392	RWDD2A	0.00433483	0.964133	0.969972	0.968151	2.68674e-17	7.12146e-17
	ENSG00000013441	CLK1	0.552308	1.54052e-21	6.97431e-21	0.646465	6.6782e-23	2.08373e-22
	ENSG00000013503	POLR3B	-0.466492	2.68681e-15	9.20372e-15	-0.914992	2.94593e-39	1.35824e-38
	ENSG00000013523	ANGEL1	-0.882457	2.515e-38	2.06689e-37	-1.97243	3.83603e-200	1.55017e-198
	ENSG00000013561	RNF14	-0.265971	5.19505e-19	2.1092e-18	-0.593527	1.16019e-73	9.9183e-73
	ENSG00000013563	DNASE1L1	-0.204527	0.0517272	0.0681415	-0.721846	4.83881e-11	1.03564e-10
	ENSG00000013573	DDX11	-0.291479	0.102022	0.128281	-0.280412	0.131158	0.155492
	ENSG00000013583	HEBP1	-0.0457388	0.525751	0.573139	-0.895484	3.82878e-31	1.47091e-30
	ENSG00000013588	GPRC5A	3.73319	4.35107e-138	6.77544e-136	5.34885	2.92335e-191	1.08731e-189
	ENSG00000013619	MAMLD1	2.68979	6.4484e-111	4.32274e-109	3.70898	4.00907e-191	1.48009e-189
	ENSG00000013725	CD6	0.102897	0.100046	0.125934	-0.118378	0.0991213	0.11929
	ENSG00000013810	TACC3	-1.07191	8.32299e-25	4.32015e-24	-1.30076	2.27708e-28	8.20805e-28
	ENSG00000014123	UFL1	-0.429669	8.95051e-13	2.69001e-12	-0.562723	1.77327e-16	4.58956e-16
	ENSG00000014138	POLA2	-0.540516	6.34523e-13	1.92195e-12	0.364539	4.47304e-06	7.57085e-06
	ENSG00000014164	ZC3H3	0.474244	4.37608e-14	1.41353e-13	0.897719	4.26765e-43	2.13912e-42
	ENSG00000014216	CAPN1	-0.482477	2.42154e-27	1.37484e-26	-0.334559	2.17383e-12	4.90242e-12
	ENSG00000014257	ACPP	0.960409	3.84033e-21	1.70455e-20	2.65937	1.34083e-141	2.86812e-140
	ENSG00000014641	MDH1	-0.163232	0.00112708	0.00180393	-0.00682267	0.888117	0.900752
	ENSG00000014824	SLC30A9	0.184777	0.0229016	0.0317614	2.42531	1.95242e-59	1.32153e-58
	ENSG00000014914	MTMR11	0.10552	0.150311	0.183279	1.00049	5.82749e-33	2.34353e-32
	ENSG00000014919	COX15	-0.576669	1.13794e-55	1.59428e-54	-0.633239	1.28469e-55	8.10149e-55
	ENSG00000015133	CCDC88C	-0.162974	0.10423	0.130804	-0.526287	2.17703e-06	3.74752e-06
	ENSG00000015153	YAF2	-0.109614	0.029108	0.0397602	-0.297725	2.07476e-06	3.57806e-06
	ENSG00000015171	ZMYND11	0.179114	0.000125943	0.000221731	-0.0746945	0.087362	0.105802
	ENSG00000015285	WAS	-0.808305	9.5378e-34	6.71283e-33	-0.919238	5.34515e-32	2.09381e-31
	ENSG00000015475	BID	0.304174	1.09055e-05	2.09626e-05	-0.447244	7.50305e-09	1.46495e-08
	ENSG00000015479	MATR3	0.302783	1.87068e-14	6.14341e-14	0.00563242	0.899789	0.910753
	ENSG00000015520	NPC1L1	0.466914	9.99884e-05	0.000177563	0.155243	0.265391	0.299843
	ENSG00000015532	XYLT2	-1.46052	5.03606e-67	9.85393e-66	-0.779065	1.84423e-14	4.48446e-14
	ENSG00000015676	NUDCD3	-0.367986	7.41948e-10	1.89434e-09	-0.772993	2.63015e-31	1.01591e-30
	ENSG00000016490	CLCA1	-0.319418	0.00465759	0.0069941	-0.0797803	0.46895	0.507252
	ENSG00000016864	GLT8D1	-0.771004	2.91482e-66	5.56496e-65	-0.968744	1.90208e-59	1.28804e-58
	ENSG00000017260	ATP2C1	0.922869	2.44002e-46	2.61663e-45	1.55114	1.22722e-93	1.39328e-92
	ENSG00000017373	SRCIN1	1.21042	6.847e-08	1.54011e-07	4.56818	9.1263e-58	5.99282e-57
	ENSG00000017427	IGF1	-0.907453	1.27707e-09	3.21829e-09	0.19302	0.182555	0.211791
	ENSG00000017483	SLC38A5	0.0454046	0.756638	0.789267	2.72363	9.13691e-62	6.46546e-61
	ENSG00000017621	MAGIX	-0.955102	1.6596e-16	6.02609e-16	-1.00726	4.13737e-18	1.12558e-17
	ENSG00000017797	RALBP1	-0.0981424	0.0590664	0.0771974	-0.375069	2.74064e-12	6.15287e-12
	ENSG00000018189	RUFY3	0.667551	5.54023e-34	3.92702e-33	0.826369	1.77931e-54	1.0989e-53
	ENSG00000018236	CNTN1	0.386278	7.16795e-05	0.000129132	0.336786	0.000813659	0.0011897
	ENSG00000018280	SLC11A1	0.281913	0.00127107	0.0020268	-0.86741	6.99729e-21	2.06317e-20
	ENSG00000018408	WWTR1	0.153317	0.160211	0.194336	0.191596	0.0629281	0.0774404
	ENSG00000018510	AGPS	-0.079039	0.0828188	0.105699	-0.697021	1.52997e-64	1.1336e-63
	ENSG00000018610	CXorf56	-0.173475	1.38219e-05	2.64158e-05	-0.509465	5.30676e-26	1.7968e-25
	ENSG00000018625	ATP1A2	-0.361934	0.0011084	0.00177594	-0.176035	0.114543	0.136728
	ENSG00000018699	TTC27	0.246736	0.014901	0.0211564	-0.309431	0.00194102	0.00275744
	ENSG00000018869	ZNF582	-0.193183	0.00412321	0.00622416	-0.265537	0.000453816	0.000675977
	ENSG00000019144	PHLDB1	0.747816	2.61736e-12	7.67646e-12	1.11736	2.9432e-20	8.53504e-20
	ENSG00000019169	MARCO	0.345556	0.177851	0.214117	1.29845	1.31719e-07	2.42336e-07
	ENSG00000019485	PRDM11	0.397673	0.000597225	0.000981521	0.258962	0.044817	0.0559165
	ENSG00000019582	CD74	0.151639	0.13342	0.164156	0.485952	5.50854e-07	9.84152e-07
	ENSG00000019991	HGF	-0.296793	0.00241062	0.0037324	-0.0417251	0.674224	0.704669
	ENSG00000019995	ZRANB1	0.313035	5.48159e-16	1.94227e-15	0.243302	9.29205e-09	1.80552e-08
	ENSG00000020129	NCDN	0.387402	4.22108e-06	8.36994e-06	-0.0711701	0.444601	0.482835
	ENSG00000020181	GPR124	0.894594	1.52512e-05	2.90507e-05	1.41555	1.86691e-11	4.05964e-11
	ENSG00000020256	ZFP64	-1.8842	2.0382e-84	6.81635e-83	-2.03225	1.80225e-73	1.53371e-72
	ENSG00000020426	MNAT1	-0.284456	4.44922e-07	9.49213e-07	-0.897268	5.73209e-48	3.16727e-47
	ENSG00000020577	SAMD4A	1.08593	4.00909e-30	2.49509e-29	3.02138	9.92305e-229	5.41494e-227
	ENSG00000020633	RUNX3	-0.639696	6.38711e-11	1.74267e-10	1.23127	5.25821e-34	2.1605e-33
	ENSG00000020922	MRE11A	-0.389013	2.43573e-07	5.28473e-07	-0.297016	7.77722e-05	0.000122148
	ENSG00000021300	PLEKHB1	-0.158591	0.0634247	0.082504	-0.020122	0.813859	0.833652
	ENSG00000021355	SERPINB1	1.20048	1.4678e-38	1.2224e-37	3.09209	1.77969e-237	1.09506e-235
	ENSG00000021488	SLC7A9	-0.849537	1.43644e-11	4.06845e-11	-0.964147	8.37149e-12	1.84508e-11
	ENSG00000021574	SPAST	-0.313521	1.10393e-11	3.14096e-11	-0.522261	1.10584e-23	3.52699e-23
	ENSG00000021645	NRXN3	0.980832	6.84745e-16	2.41478e-15	1.45682	8.27488e-35	3.46766e-34
	ENSG00000021762	OSBPL5	-0.000157166	0.997965	0.998232	0.443925	4.68912e-10	9.67325e-10
	ENSG00000021776	AQR	-0.0515398	0.460624	0.509463	-0.141444	0.0530802	0.0657816
	ENSG00000021826	CPS1	0.391066	3.45743e-05	6.37931e-05	0.933432	1.81734e-20	5.29274e-20
	ENSG00000021852	C8B	0.0173409	0.829315	0.854229	0.296958	0.000431833	0.000644141
	ENSG00000022267	FHL1	-1.00402	1.35542e-07	2.98633e-07	-1.39487	1.61562e-12	3.66011e-12
	ENSG00000022277	C20orf43	-0.318656	1.46647e-17	5.56402e-17	-0.380847	4.46091e-24	1.43316e-23
	ENSG00000022556	NLRP2	0.307637	0.000303159	0.000513358	-0.186755	0.03248	0.041177
	ENSG00000022567	SLC45A4	-0.816401	2.1993e-18	8.6656e-18	-0.0234052	0.788465	0.810305
	ENSG00000022840	RNF10	0.473138	6.31917e-75	1.57969e-73	0.480091	3.61715e-76	3.20022e-75
	ENSG00000022976	ZNF839	-0.478206	1.88213e-19	7.77238e-19	-0.613597	3.27309e-25	1.08297e-24
	ENSG00000023041	ZDHHC6	0.171403	5.6429e-09	1.36387e-08	0.0325897	0.295266	0.331294
	ENSG00000023171	GRAMD1B	0.51738	8.6569e-05	0.00015491	-0.703131	1.09815e-07	2.0286e-07
	ENSG00000023191	RNH1	-0.080448	0.10287	0.129249	-0.160045	0.00394539	0.0054718
	ENSG00000023228	NDUFS1	-0.0871246	0.0176663	0.0248512	-0.24607	3.92953e-11	8.43565e-11
	ENSG00000023287	RB1CC1	1.13662	3.50038e-63	6.12014e-62	1.162	1.08543e-52	6.46328e-52
	ENSG00000023318	ERP44	0.28895	1.54071e-13	4.82954e-13	0.688484	5.31913e-72	4.42827e-71
	ENSG00000023330	ALAS1	0.32979	0.000146495	0.000255777	0.94716	1.31039e-26	4.50515e-26
	ENSG00000023445	BIRC3	3.18163	7.46281e-121	6.80254e-119	4.70941	6.6785e-273	5.48664e-271
	ENSG00000023516	AKAP11	-1.45704	1.12126e-56	1.6242e-55	-2.01745	3.63916e-119	5.90801e-118
	ENSG00000023572	GLRX2	0.170237	0.0255172	0.035154	-0.476045	1.87766e-11	4.08241e-11
	ENSG00000023608	SNAPC1	2.18332	2.90084e-92	1.19344e-90	1.72231	2.64782e-69	2.11599e-68
	ENSG00000023697	DERA	-0.520385	2.65319e-30	1.663e-29	-0.482797	1.29804e-17	3.47508e-17
	ENSG00000023734	STRAP	0.441412	4.92144e-36	3.7536e-35	0.109678	0.0029743	0.00416675
	ENSG00000023839	ABCC2	-0.0406179	0.738962	0.772769	-0.475875	8.87745e-05	0.000138917
	ENSG00000023892	DEF6	-1.24428	1.84136e-35	1.3777e-34	-1.35667	4.45771e-38	2.01e-37
	ENSG00000023902	PLEKHO1	1.09013	7.97975e-30	4.91307e-29	1.42582	3.24931e-50	1.8593e-49
	ENSG00000023909	GCLM	1.84619	9.50395e-86	3.28876e-84	1.0074	3.2889e-30	1.23433e-29
	ENSG00000024048	UBR2	-0.202933	0.000292198	0.000495695	-0.233568	0.00025196	0.000382351
	ENSG00000024422	EHD2	1.23584	2.58235e-19	1.05879e-18	0.977872	1.13791e-09	2.30668e-09
	ENSG00000024526	DEPDC1	-0.336839	0.060569	0.0790096	-0.510383	0.00958853	0.0128558
	ENSG00000024862	CCDC28A	-0.528047	1.83327e-11	5.16503e-11	-0.363829	6.24621e-06	1.04877e-05
	ENSG00000025039	RRAGD	0.560879	9.99869e-17	3.67249e-16	-0.00564137	0.935267	0.943217
	ENSG00000025156	HSF2	-0.295876	9.45722e-06	1.82774e-05	-1.13082	1.42113e-45	7.47669e-45
	ENSG00000025293	PHF20	0.382086	1.11787e-11	3.18004e-11	-0.687313	9.2948e-26	3.12586e-25
	ENSG00000025423	HSD17B6	0.132813	0.340464	0.388578	0.0893549	0.521132	0.557645
	ENSG00000025434	NR1H3	0.355858	0.0138245	0.0197084	-0.277593	0.0438925	0.0548226
	ENSG00000025708	TYMP	0.827747	1.97181e-18	7.77952e-18	1.39636	3.23537e-51	1.87646e-50
	ENSG00000025770	NCAPH2	0.175961	0.0504416	0.0665711	-0.0630091	0.489561	0.526803
	ENSG00000025772	TOMM34	0.641232	2.72652e-21	1.21996e-20	1.25311	2.1204e-89	2.27596e-88
	ENSG00000025796	SEC63	0.176759	5.99786e-09	1.4478e-08	0.170492	2.19977e-08	4.20654e-08
	ENSG00000025800	KPNA6	0.160772	0.0015388	0.00243064	-0.0272695	0.603006	0.636823
	ENSG00000026025	VIM	0.991302	1.45984e-51	1.80059e-50	1.71265	2.36034e-147	5.42118e-146
	ENSG00000026103	FAS	0.491285	3.90017e-05	7.17318e-05	1.5962	1.83019e-48	1.0207e-47
	ENSG00000026297	RNASET2	-0.186592	0.173021	0.208762	0.266266	0.043496	0.0543546
	ENSG00000026508	CD44	1.97501	5.42642e-214	9.01328e-211	2.90797	0	0
	ENSG00000026652	AGPAT4	0.576922	2.10684e-12	6.20351e-12	-0.246369	0.00336465	0.00469206
	ENSG00000026751	SLAMF7	3.75392	1.18844e-182	7.4025e-180	6.18446	0	0
	ENSG00000026950	BTN3A1	-0.403558	0.000246417	0.000420993	0.625387	4.5466e-09	8.97198e-09
	ENSG00000027001	MIPEP	-0.595403	1.17931e-22	5.58602e-22	-0.839257	2.94978e-25	9.77291e-25
	ENSG00000027075	PRKCH	1.313	1.67651e-38	1.38848e-37	2.19749	1.89299e-76	1.67876e-75
	ENSG00000027644	INSRR	0.229599	0.0986029	0.124337	0.154292	0.279108	0.314367
	ENSG00000027697	IFNGR1	-0.903039	2.74566e-42	2.60272e-41	-1.21985	5.68629e-60	3.89114e-59
	ENSG00000027847	B4GALT7	-0.285504	0.00144249	0.00228671	-0.414831	1.10856e-05	1.83557e-05
	ENSG00000027869	SH2D2A	-0.299486	0.0307884	0.0419062	-0.516018	0.000962262	0.00139931
	ENSG00000028116	VRK2	0.637481	1.80762e-05	3.41922e-05	1.19356	3.36319e-14	8.1212e-14
	ENSG00000028137	TNFRSF1B	1.45168	4.76498e-50	5.64435e-49	1.86188	5.47091e-87	5.6649e-86
	ENSG00000028203	VEZT	0.468556	3.14116e-30	1.96145e-29	-0.0376912	0.401753	0.439848
	ENSG00000028277	POU2F2	0.805996	1.94903e-12	5.75243e-12	-0.692866	9.73439e-10	1.98106e-09
	ENSG00000028310	BRD9	0.249626	5.24153e-08	1.18865e-07	0.0129255	0.775243	0.798418
	ENSG00000028528	SNX1	-0.392559	7.35808e-27	4.09973e-26	-0.54663	5.45299e-51	3.15286e-50
	ENSG00000028839	TBPL1	0.182205	0.000171309	0.00029733	0.189887	0.00555596	0.00760321
	ENSG00000029153	ARNTL2	1.18434	1.9956e-20	8.60959e-20	2.38478	7.37471e-67	5.63447e-66
	ENSG00000029363	BCLAF1	0.329806	1.121e-11	3.18832e-11	0.316399	9.56362e-10	1.94763e-09
	ENSG00000029364	SLC39A9	-0.0213538	0.553288	0.599529	0.0392233	0.242969	0.276391
	ENSG00000029559	IBSP	1.09109	1.61762e-06	3.31302e-06	1.43365	6.77283e-09	1.32514e-08
	ENSG00000029639	TFB1M	-0.702366	4.39446e-33	3.02871e-32	-1.10247	4.06545e-63	2.94795e-62
	ENSG00000029725	RABEP1	0.318768	4.0269e-16	1.43534e-15	-0.0284841	0.543666	0.579683
	ENSG00000029993	HMGB3	-0.339149	0.000102921	0.000182619	-0.888972	2.16775e-20	6.30832e-20
	ENSG00000030066	NUP160	0.0308048	0.667527	0.706769	1.30729	5.567e-62	3.95429e-61
	ENSG00000030110	BAK1	-0.0797909	0.217208	0.257415	0.547036	1.27553e-14	3.12088e-14
	ENSG00000030304	MUSK	-0.0658739	0.696198	0.733612	-0.207235	0.316642	0.353105
	ENSG00000030419	IKZF2	1.12168	9.41194e-13	2.82358e-12	3.78762	1.22751e-233	7.14153e-232
	ENSG00000030582	GRN	-0.118513	0.0902676	0.114609	0.184519	0.00737077	0.0099853
	ENSG00000031003	FAM13B	-0.201547	0.000125851	0.000221613	-0.75495	1.68294e-44	8.69802e-44
	ENSG00000031081	ARHGAP31	0.48227	4.30226e-10	1.11386e-09	0.533832	2.59341e-11	5.606e-11
	ENSG00000031691	CENPQ	-0.657296	4.36562e-18	1.69908e-17	-0.485138	1.26177e-08	2.43778e-08
	ENSG00000031698	SARS	-0.0206337	0.793795	0.823258	-0.390537	5.45431e-07	9.74581e-07
	ENSG00000031823	RANBP3	-0.0885348	0.240368	0.282534	-0.204722	0.005256	0.00720856
	ENSG00000032219	ARID4A	-0.231326	0.0139211	0.0198386	-0.47614	2.49198e-06	4.27245e-06
	ENSG00000032389	TSSC1	-0.202317	0.00104636	0.00168086	-0.229161	0.000432761	0.000645387
	ENSG00000032444	PNPLA6	-0.332813	8.33205e-06	1.6174e-05	-0.506939	2.94297e-10	6.12347e-10
	ENSG00000032742	IFT88	-0.789352	4.98183e-42	4.69272e-41	-1.30473	1.98785e-102	2.56227e-101
	ENSG00000033011	ALG1	-0.427478	1.16061e-10	3.11939e-10	-0.475584	2.39712e-12	5.39705e-12
	ENSG00000033030	ZCCHC8	0.212024	0.0048138	0.00721568	0.397101	5.6778e-07	1.01318e-06
	ENSG00000033050	ABCF2	0.387333	2.07887e-16	7.5047e-16	-0.327208	5.10639e-09	1.00647e-08
	ENSG00000033100	CHPF2	-0.358658	9.70462e-25	5.01814e-24	-1.05167	1.39542e-103	1.82222e-102
	ENSG00000033122	LRRC7	0.661018	1.64959e-05	3.1305e-05	0.564592	0.00108165	0.00156683
	ENSG00000033170	FUT8	-0.800569	3.97455e-24	2.00968e-23	-0.338313	0.000120114	0.000186263
	ENSG00000033178	UBA6	0.451969	6.8865e-10	1.76097e-09	2.05437	8.20782e-88	8.60613e-87
	ENSG00000033327	GAB2	0.391783	5.89692e-07	1.24545e-06	1.53483	7.82024e-79	7.17791e-78
	ENSG00000033627	ATP6V0A1	-0.763572	7.25643e-15	2.42894e-14	-1.74129	3.28276e-53	1.97441e-52
	ENSG00000033800	PIAS1	-0.0133173	0.808379	0.83589	0.0205433	0.734547	0.761435
	ENSG00000033867	SLC4A7	-0.816954	2.37638e-21	1.06712e-20	-0.477002	2.4745e-06	4.24298e-06
	ENSG00000034053	APBA2	0.290547	1.0432e-07	2.31377e-07	0.328749	1.62219e-07	2.97207e-07
	ENSG00000034063	UHRF1	-0.359201	0.000727396	0.00118697	-0.414693	0.000149578	0.000230589
	ENSG00000034152	MAP2K3	1.56595	3.29383e-59	5.10783e-58	1.4678	1.41509e-52	8.39287e-52
	ENSG00000034510	TMSB10	0.284531	0.0938954	0.118892	1.12065	1.8804e-11	4.08719e-11
	ENSG00000034533	ASTE1	-0.261633	2.27037e-07	4.93668e-07	-0.34857	1.27239e-07	2.34325e-07
	ENSG00000034677	RNF19A	0.255622	0.000778193	0.00126586	1.00586	4.37727e-40	2.06398e-39
	ENSG00000034693	PEX3	-0.738697	1.79339e-44	1.84384e-43	-0.502139	5.00499e-16	1.28054e-15
	ENSG00000034713	GABARAPL2	0.0915927	0.171532	0.20711	0.0744521	0.273342	0.308198
	ENSG00000035115	SH3YL1	0.0850972	0.259156	0.302761	-0.0192131	0.820617	0.839827
	ENSG00000035141	FAM136A	-0.616701	1.30471e-15	4.5443e-15	-0.635026	2.14126e-18	5.87343e-18
	ENSG00000035403	VCL	-0.513743	4.22797e-08	9.65093e-08	-0.710109	5.44323e-13	1.25462e-12
	ENSG00000035499	DEPDC1B	-0.40442	0.00380459	0.00576357	-0.0708135	0.6449	0.677193
	ENSG00000035664	DAPK2	-0.941678	2.71028e-27	1.53586e-26	-1.16854	1.44133e-30	5.46972e-30
	ENSG00000035681	NSMAF	0.420419	1.04134e-17	3.97624e-17	0.315678	3.39792e-08	6.44661e-08
	ENSG00000035687	ADSS	1.07389	5.92731e-33	4.06269e-32	1.20173	1.5502e-30	5.87842e-30
	ENSG00000035720	STAP1	0.886407	7.67316e-06	1.49376e-05	4.24888	3.41842e-130	6.28686e-129
	ENSG00000035862	TIMP2	-0.501602	1.47522e-07	3.24118e-07	-0.171513	0.0661184	0.0811727
	ENSG00000035928	RFC1	-0.813999	1.41777e-76	3.73138e-75	-0.557158	7.01448e-14	1.66981e-13
	ENSG00000036054	TBC1D23	0.441245	1.17772e-16	4.31303e-16	0.232369	7.08436e-05	0.000111583
	ENSG00000036257	CUL3	0.326644	2.64979e-09	6.54522e-09	0.152009	0.00562388	0.00769053
	ENSG00000036448	MYOM2	0.332594	0.00866311	0.012647	-0.0963381	0.43585	0.474296
	ENSG00000036530	CYP46A1	0.183318	0.27623	0.321002	0.163304	0.355734	0.393325
	ENSG00000036549	ZZZ3	0.103489	0.0407733	0.0545969	-0.630864	4.97875e-19	1.39144e-18
	ENSG00000036565	SLC18A1	-0.184247	0.382559	0.431529	-0.450288	0.0322927	0.0409499
	ENSG00000036672	USP2	0.448418	0.0350699	0.0473758	-1.76952	3.45011e-16	8.86053e-16
	ENSG00000036828	CASR	-0.428316	0.0327506	0.0444313	-0.106216	0.571402	0.607006
	ENSG00000037042	TUBG2	-0.967839	1.22574e-46	1.32396e-45	-0.877655	1.56831e-32	6.23487e-32
	ENSG00000037241	RPL26L1	-0.0123116	0.956805	0.963443	0.277572	0.236011	0.269295
	ENSG00000037474	NSUN2	0.725817	1.0561e-64	1.92767e-63	0.947306	4.8628e-85	4.90281e-84
	ENSG00000037637	FBXO42	0.15925	6.52468e-05	0.000117842	0.19237	2.74519e-05	4.44318e-05
	ENSG00000037749	MFAP3	-0.0154939	0.81287	0.839778	-0.0456689	0.513519	0.550364
	ENSG00000037757	MRI1	-1.22756	6.34374e-44	6.39896e-43	-1.51548	9.19518e-68	7.14957e-67
	ENSG00000037897	METTL1	1.67496	1.24931e-40	1.11564e-39	1.8974	4.4986e-62	3.20148e-61
	ENSG00000038002	AGA	0.0943326	0.049775	0.0657553	0.486152	1.15319e-23	3.67488e-23
	ENSG00000038210	PI4K2B	0.612591	2.99073e-16	1.07343e-15	2.40081	8.53399e-232	4.87024e-230
	ENSG00000038219	BOD1L	0.0975304	0.296432	0.34256	0.0462756	0.647873	0.679932
	ENSG00000038274	MAT2B	0.167466	0.0182871	0.0256714	1.24561	4.76258e-71	3.92126e-70
	ENSG00000038358	EDC4	-0.129154	0.125426	0.155112	-0.339339	0.000213504	0.000325845
	ENSG00000038382	TRIO	0.804209	5.57519e-21	2.452e-20	0.849875	4.16219e-22	1.27188e-21
	ENSG00000038427	VCAN	0.157888	0.418806	0.467777	1.73493	1.33484e-17	3.57231e-17
	ENSG00000038532	CLEC16A	-0.342783	4.92855e-09	1.19528e-08	-0.459731	2.12632e-15	5.33255e-15
	ENSG00000038945	MSR1	-0.775383	2.09007e-10	5.51438e-10	-0.530979	1.16899e-05	1.93307e-05
	ENSG00000039068	CDH1	0.298725	0.00614281	0.00911001	0.621705	3.36714e-08	6.38902e-08
	ENSG00000039123	SKIV2L2	-0.117398	0.057139	0.0748682	-0.746967	2.06515e-31	7.99953e-31
	ENSG00000039139	DNAH5	0.174479	0.361353	0.410071	0.90569	3.77029e-05	6.04994e-05
	ENSG00000039319	ZFYVE16	0.983425	4.68178e-39	3.97659e-38	-0.00839359	0.921804	0.930643
	ENSG00000039523	FAM65A	-0.33708	2.74406e-10	7.19287e-10	-0.861822	2.22915e-49	1.26395e-48
	ENSG00000039537	C6	0.312449	0.164509	0.199323	0.17472	0.46247	0.50081
	ENSG00000039560	RAI14	0.338897	0.0158051	0.0223741	-0.561642	4.65185e-05	7.41835e-05
	ENSG00000039600	SOX30	0.156857	0.389316	0.438212	-0.00502994	0.97937	0.981997
	ENSG00000039650	PNKP	-0.0777111	0.371038	0.419692	-0.307733	0.000486707	0.00072324
	ENSG00000039987	BEST2	0.248224	0.0440074	0.0585656	1.13561	2.23908e-18	6.1395e-18
	ENSG00000040199	PHLPP2	0.716708	1.43622e-20	6.22322e-20	0.692074	2.49448e-16	6.43393e-16
	ENSG00000040275	CCDC99	-0.74179	1.40658e-46	1.51709e-45	-0.681487	1.5392e-34	6.41061e-34
	ENSG00000040341	STAU2	-0.673841	3.25858e-29	1.96739e-28	-0.8328	2.04701e-38	9.3002e-38
	ENSG00000040487	PQLC2	-0.479235	3.63185e-08	8.3258e-08	-1.22656	4.17323e-44	2.14426e-43
	ENSG00000040531	CTNS	0.848799	3.46033e-68	6.9998e-67	-0.271663	5.31733e-09	1.04708e-08
	ENSG00000040608	RTN4R	-0.512193	0.000194632	0.000335977	-3.12322	4.24918e-85	4.28992e-84
	ENSG00000040633	PHF23	-0.613599	1.02841e-56	1.49259e-55	-1.8069	3.46674e-162	9.20687e-161
	ENSG00000040933	INPP4A	-1.23628	2.80976e-59	4.37533e-58	-1.74618	2.69633e-62	1.93175e-61
	ENSG00000041353	RAB27B	-0.133214	0.493565	0.542123	-0.496808	0.0126262	0.016729
	ENSG00000041357	PSMA4	0.314946	2.2755e-05	4.27342e-05	1.08154	1.98042e-39	9.16756e-39
	ENSG00000041515	MYO16	-0.00433334	0.97411	0.978036	-0.364226	0.00840122	0.0113197
	ENSG00000041802	LSG1	-0.185589	1.57689e-05	2.99833e-05	-0.478536	4.08836e-17	1.07964e-16
	ENSG00000041880	PARP3	-0.544447	1.38624e-10	3.70317e-10	-0.484866	1.63784e-07	3.00037e-07
	ENSG00000041982	TNC	2.18599	1.39306e-65	2.59986e-64	3.5162	4.26324e-134	8.26769e-133
	ENSG00000041988	THAP3	0.254639	0.022072	0.030662	1.39463	7.17765e-31	2.73986e-30
	ENSG00000042062	FAM65C	2.82038	4.14917e-109	2.6851e-107	4.1363	1.33191e-209	5.80604e-208
	ENSG00000042088	TDP1	-0.218017	0.000120561	0.000212507	-1.4666	3.81869e-82	3.69083e-81
	ENSG00000042286	AIFM2	1.0367	1.07534e-37	8.70341e-37	0.618357	1.00562e-12	2.29768e-12
	ENSG00000042317	SPATA7	-0.872548	1.49644e-33	1.04828e-32	-0.70912	6.7877e-19	1.8917e-18
	ENSG00000042429	MED17	0.443552	3.89554e-20	1.65863e-19	0.449925	1.63845e-19	4.6433e-19
	ENSG00000042445	RETSAT	-0.330589	8.97453e-07	1.87061e-06	-0.14816	0.0315206	0.0400136
	ENSG00000042493	CAPG	-0.185759	0.051951	0.0684062	0.252514	0.00601072	0.00819404
	ENSG00000042753	AP2S1	-0.53984	7.96128e-05	0.000142839	-0.544515	7.342e-05	0.000115495
	ENSG00000042781	USH2A	0.180963	0.0598711	0.0781603	0.748281	8.86557e-12	1.95225e-11
	ENSG00000042813	ZPBP	-0.74177	2.75232e-13	8.515e-13	-0.641908	4.89188e-11	1.0467e-10
	ENSG00000042832	TG	-1.02924	5.43604e-17	2.01696e-16	-2.13547	9.52588e-69	7.53204e-68
	ENSG00000042980	ADAM28	-0.255371	0.0001429	0.000249762	0.249056	0.000361213	0.00054182
	ENSG00000043093	DCUN1D1	0.393223	1.70939e-18	6.75844e-18	0.623532	9.82934e-36	4.21354e-35
	ENSG00000043143	PHF15	1.24506	2.2051e-48	2.50106e-47	2.41591	2.69282e-136	5.3972e-135
	ENSG00000043462	LCP2	1.48502	2.6335e-95	1.17342e-93	2.65262	1.90896e-162	5.09693e-161
	ENSG00000043514	TRIT1	0.358409	8.79336e-15	2.93027e-14	0.114089	0.0211553	0.02737
	ENSG00000044090	CUL7	-0.160218	0.0178709	0.0251201	-0.135714	0.0752245	0.0917944
	ENSG00000044115	CTNNA1	0.476976	1.29315e-70	2.81797e-69	1.04756	2.44628e-213	1.13241e-211
	ENSG00000044446	PHKA2	-0.281434	7.79949e-10	1.98933e-09	-0.109688	0.0225107	0.0290481
	ENSG00000044459	CNTLN	0.163768	0.0017016	0.00267395	0.841781	7.205e-41	3.46062e-40
	ENSG00000044574	HSPA5	1.18454	7.58879e-25	3.94179e-24	1.93451	3.22537e-42	1.58891e-41
	ENSG00000046647	GEMIN8	-0.211635	0.00182418	0.00285905	-0.130893	0.0439197	0.0548519
	ENSG00000046651	OFD1	-0.114302	0.0219127	0.0304556	-0.250975	6.78881e-07	1.20683e-06
	ENSG00000046653	GPM6B	-0.0787554	0.330764	0.37849	-0.146126	0.126457	0.150289
	ENSG00000047056	WDR37	0.0281243	0.57385	0.619251	-0.468692	3.41795e-12	7.63562e-12
	ENSG00000047188	YTHDC2	-0.637243	8.95929e-40	7.77321e-39	-0.693807	6.4938e-35	2.7251e-34
	ENSG00000047230	CTPS2	-1.14889	3.51552e-53	4.53438e-52	-1.10537	1.00131e-38	4.57008e-38
	ENSG00000047249	ATP6V1H	0.810026	3.60353e-69	7.55528e-68	0.580257	5.75827e-31	2.20142e-30
	ENSG00000047315	POLR2B	0.287036	0.0311646	0.0423835	0.167961	0.2247	0.257134
	ENSG00000047346	FAM214A	-0.376594	2.46117e-11	6.87959e-11	-0.570175	2.82059e-21	8.41618e-21
	ENSG00000047365	ARAP2	1.52863	3.28208e-65	6.08733e-64	4.19841	0	0
	ENSG00000047410	TPR	-0.0406707	0.711354	0.747454	-0.083813	0.475467	0.513558
	ENSG00000047578	KIAA0556	0.114285	0.0387533	0.0520412	-0.0712769	0.238336	0.271671
	ENSG00000047579	DTNBP1	-0.376228	4.66673e-05	8.52327e-05	-0.685297	5.12696e-13	1.18336e-12
	ENSG00000047617	ANO2	-0.174211	0.0335101	0.0453752	0.00323214	0.970894	0.974718
	ENSG00000047621	C12orf4	-0.226323	4.89981e-07	1.04237e-06	-0.251908	2.07927e-08	3.9807e-08
	ENSG00000047634	SCML1	0.746108	6.56984e-16	2.31852e-15	0.676689	1.26495e-09	2.55864e-09
	ENSG00000047644	WWC3	-0.088329	0.164077	0.198848	-0.188969	0.00571087	0.00780306
	ENSG00000047648	ARHGAP6	-1.35168	1.09832e-43	1.09898e-42	-1.44962	5.71972e-35	2.40228e-34
	ENSG00000047662	FAM184B	-0.114167	0.012003	0.0172498	-0.214782	0.000267926	0.000405879
	ENSG00000047849	MAP4	0.317362	4.93979e-12	1.42751e-11	0.405508	5.25898e-16	1.3446e-15
	ENSG00000047932	GOPC	-0.140697	0.00441832	0.00665017	0.100344	0.0995374	0.119743
	ENSG00000047936	ROS1	0.477897	0.0406813	0.0544835	1.02788	6.93594e-05	0.000109349
	ENSG00000048028	USP28	-0.344401	3.39115e-05	6.26629e-05	0.406277	2.2364e-06	3.84574e-06
	ENSG00000048052	HDAC9	0.892292	3.92873e-35	2.90889e-34	0.869643	8.1165e-23	2.52513e-22
	ENSG00000048140	TSPAN17	-0.0916599	0.256936	0.300331	-0.280723	0.00040798	0.000610195
	ENSG00000048162	NOP16	1.25116	2.68044e-20	1.14682e-19	0.450244	0.000694862	0.00102159
	ENSG00000048342	CC2D2A	-0.206333	0.0130663	0.0186882	0.09462	0.302513	0.338662
	ENSG00000048392	RRM2B	-0.069271	0.462938	0.511642	0.0359723	0.689137	0.718698
	ENSG00000048405	ZNF800	0.339575	4.08274e-11	1.12731e-10	0.20651	0.000139784	0.000215847
	ENSG00000048462	TNFRSF17	0.21564	0.0560264	0.073507	-0.258628	0.036589	0.0461203
	ENSG00000048471	SNX29	-0.399804	2.45445e-08	5.68684e-08	-0.363973	4.39158e-05	7.01302e-05
	ENSG00000048540	LMO3	0.158505	0.391454	0.440154	0.475329	0.0117197	0.0155749
	ENSG00000048544	MRPS10	-0.0184738	0.618053	0.66094	-0.079003	0.0441285	0.055099
	ENSG00000048649	RSF1	0.337856	5.58185e-09	1.34934e-08	0.699229	2.57032e-31	9.93575e-31
	ENSG00000048707	VPS13D	-0.207506	2.51585e-10	6.60509e-10	0.191537	5.57498e-09	1.09594e-08
	ENSG00000048740	CELF2	-0.647656	2.52564e-25	1.33084e-24	-1.08028	2.89926e-47	1.57693e-46
	ENSG00000048828	FAM120A	-0.141121	0.000399492	0.000669358	-0.173173	1.45821e-05	2.39832e-05
	ENSG00000048991	R3HDM1	-0.462982	2.4501e-19	1.00567e-18	-0.434027	6.13092e-15	1.5147e-14
	ENSG00000049089	COL9A2	0.125521	0.0251809	0.0347259	-0.318779	4.17863e-08	7.88476e-08
	ENSG00000049130	KITLG	0.244289	0.0635957	0.0827121	0.125449	0.3498	0.38728
	ENSG00000049167	ERCC8	-0.299315	2.62319e-07	5.67908e-07	-0.880783	8.42913e-44	4.3027e-43
	ENSG00000049192	ADAMTS6	-0.383105	0.0241533	0.0334074	-0.281501	0.091711	0.110818
	ENSG00000049239	H6PD	-0.40573	4.17029e-07	8.9238e-07	0.398688	7.07588e-08	1.32001e-07
	ENSG00000049245	VAMP3	0.302987	9.85877e-30	6.06247e-29	0.147776	1.14388e-07	2.11152e-07
	ENSG00000049246	PER3	0.34987	6.34201e-07	1.337e-06	0.120586	0.166717	0.194442
	ENSG00000049247	UTS2	0.833245	0.00857396	0.0125229	0.0795919	0.799632	0.820822
	ENSG00000049249	TNFRSF9	2.51783	1.33907e-69	2.83724e-68	4.35142	8.84182e-157	2.24835e-155
	ENSG00000049283	EPN3	-0.0641475	0.757933	0.790508	-0.442736	0.0404065	0.0506673
	ENSG00000049449	RCN1	1.94118	4.58001e-60	7.29143e-59	2.41926	4.47972e-113	6.75891e-112
	ENSG00000049540	ELN	0.473561	0.000734832	0.00119832	0.516236	0.000352161	0.000528613
	ENSG00000049541	RFC2	-0.0839587	0.315078	0.362176	0.637367	6.00577e-16	1.53161e-15
	ENSG00000049618	ARID1B	-0.478212	1.73736e-13	5.4255e-13	-0.62466	5.37191e-19	1.50048e-18
	ENSG00000049656	CLPTM1L	0.0903583	0.0525303	0.0691385	0.163438	0.00028423	0.000429925
	ENSG00000049759	NEDD4L	1.08856	6.12442e-49	7.04803e-48	1.62693	1.09346e-112	1.63987e-111
	ENSG00000049768	FOXP3	-0.176504	0.177006	0.213203	-0.0671555	0.64028	0.672672
	ENSG00000049769	PPP1R3F	-0.361468	9.98475e-10	2.53459e-09	-0.451056	9.39402e-13	2.14901e-12
	ENSG00000049860	HEXB	-0.164624	0.00105785	0.00169804	0.113103	0.0209471	0.027124
	ENSG00000049883	PTCD2	-0.240622	0.00178763	0.00280442	0.0722899	0.347315	0.384813
	ENSG00000050130	JKAMP	-0.638136	3.07547e-23	1.49805e-22	-0.902067	2.92378e-39	1.34844e-38
	ENSG00000050165	3	0.685234	3.16401e-05	5.86906e-05	0.541892	0.00138668	0.00199458
	ENSG00000050327	ARHGEF5	-0.0860239	0.606724	0.650157	-0.0347511	0.84155	0.858839
	ENSG00000050344	NFE2L3	-0.0501378	0.677539	0.716507	0.372996	0.00253421	0.00356962
	ENSG00000050393	CCDC90A	0.126066	0.00656195	0.00971041	0.0574273	0.221266	0.253379
	ENSG00000050405	LIMA1	-0.800748	2.76631e-10	7.24844e-10	-1.00687	1.19544e-16	3.11616e-16
	ENSG00000050426	LETMD1	-0.483877	2.08948e-25	1.10451e-24	-0.63459	4.4712e-36	1.93162e-35
	ENSG00000050438	SLC4A8	-0.148078	0.0784632	0.100406	-0.522369	2.63177e-08	5.01917e-08
	ENSG00000050628	PTGER3	3.24439	1.46676e-48	1.66615e-47	4.45491	9.16348e-101	1.1572e-99
	ENSG00000050730	TNIP3	5.95561	9.35452e-180	4.82209e-177	7.66091	7.54465503215741e-312	8.95299063816014e-310
	ENSG00000050748	MAPK9	-0.754263	2.01361e-53	2.62437e-52	-0.740076	4.89512e-38	2.20391e-37
	ENSG00000050767	COL23A1	-0.539465	5.10792e-06	1.00604e-05	-0.237661	0.0484518	0.0602605
	ENSG00000050820	BCAR1	0.557434	9.89866e-05	0.00017593	2.27532	6.07955e-47	3.28996e-46
	ENSG00000051009	FAM160A2	0.483991	9.61739e-20	4.03057e-19	0.363082	7.75362e-12	1.71117e-11
	ENSG00000051108	HERPUD1	0.431115	1.22245e-05	2.34347e-05	1.10827	3.55464e-20	1.02763e-19
	ENSG00000051128	HOMER3	-0.646351	6.39274e-10	1.63723e-09	-0.998925	1.16633e-22	3.61353e-22
	ENSG00000051180	RAD51	-0.768553	1.32958e-13	4.18528e-13	-0.876488	1.40175e-13	3.30114e-13
	ENSG00000051341	POLQ	-0.878964	9.34532e-06	1.80682e-05	-0.920574	2.79135e-05	4.51643e-05
	ENSG00000051382	PIK3CB	1.26885	5.81972e-99	2.87125e-97	1.02406	2.9851e-45	1.56443e-44
	ENSG00000051523	CYBA	0.0535141	0.696315	0.733612	0.350292	0.007918	0.0106966
	ENSG00000051596	THOC3	-1.15511	1.44728e-49	1.68631e-48	-1.41457	4.35982e-58	2.87933e-57
	ENSG00000051620	HEBP2	0.0490156	0.638098	0.679266	0.0148052	0.887979	0.900752
	ENSG00000051825	MPHOSPH9	-0.567375	8.95547e-17	3.29499e-16	-0.379946	2.21698e-07	4.03509e-07
	ENSG00000052126	PLEKHA5	-0.388238	0.00145776	0.00230946	-0.114883	0.33701	0.374283
	ENSG00000052344	PRSS8	-0.389545	6.50583e-08	1.46646e-07	-0.591627	2.53337e-11	5.47701e-11
	ENSG00000052723	SIKE1	-0.472547	7.23535e-15	2.42243e-14	-0.724947	5.9757e-31	2.28396e-30
	ENSG00000052749	RRP12	0.913209	4.96699e-24	2.50174e-23	0.596563	3.08344e-09	6.13651e-09
	ENSG00000052795	FNIP2	2.19058	3.74444e-135	5.43453e-133	2.83802	3.61335e-181	1.19793e-179
	ENSG00000052802	MSMO1	0.588132	0.000256416	0.000437325	-0.18304	0.253924	0.287911
	ENSG00000052841	TTC17	0.0730043	0.0952732	0.120453	0.30785	4.52899e-09	8.93842e-09
	ENSG00000053108	FSTL4	0.182096	0.0755971	0.0970987	0.486204	3.32251e-06	5.66326e-06
	ENSG00000053254	FOXN3	-0.497239	1.76212e-16	6.39214e-16	-0.766431	4.31903e-34	1.7795e-33
	ENSG00000053328	METTL24	-0.036723	0.769214	0.801003	0.280023	0.0478171	0.0595206
	ENSG00000053371	AKR7A2	-0.444981	4.37963e-08	9.98492e-08	-0.36025	5.54626e-06	9.33555e-06
	ENSG00000053372	MRTO4	0.61012	2.90451e-06	5.83752e-06	-0.322845	0.00924107	0.0124044
	ENSG00000053501	USE1	0.196972	0.164948	0.199774	-0.0588319	0.687121	0.716845
	ENSG00000053524	MCF2L2	1.14968	2.31091e-15	7.94887e-15	1.97979	2.60249e-34	1.07791e-33
	ENSG00000053702	NRIP2	-1.05218	8.24744e-21	3.60922e-20	-1.19292	1.04656e-19	2.97946e-19
	ENSG00000053747	LAMA3	0.397886	6.4925e-06	1.27054e-05	0.854858	4.06208e-18	1.1055e-17
	ENSG00000053770	AP5M1	-0.0353291	0.485675	0.534518	-0.435863	1.23748e-15	3.12865e-15
	ENSG00000053900	ANAPC4	-0.330475	4.81117e-06	9.49217e-06	-0.344744	1.90403e-06	3.29228e-06
	ENSG00000053918	KCNQ1	-0.218303	2.34708e-05	4.40121e-05	0.0521208	0.348232	0.385744
	ENSG00000054116	TRAPPC3	0.0285567	0.710085	0.746279	-0.0789621	0.336473	0.373715
	ENSG00000054118	THRAP3	0.470834	9.17591e-35	6.70433e-34	0.587874	3.51096e-49	1.98322e-48
	ENSG00000054148	PHPT1	0.109221	0.370344	0.419161	0.221233	0.0704413	0.0862109
	ENSG00000054219	LY75	-0.257845	0.00194561	0.00304045	0.399677	2.21424e-06	3.81069e-06
	ENSG00000054267	ARID4B	0.564403	6.22921e-41	5.63002e-40	0.933943	3.59707e-140	7.50118e-139
	ENSG00000054277	OPN3	0.703039	0.000118341	0.000208716	0.752985	7.50797e-05	0.000117994
	ENSG00000054282	SDCCAG8	-0.296076	3.24011e-05	5.99906e-05	-0.0761174	0.313712	0.350177
	ENSG00000054356	PTPRN	0.214128	0.0329764	0.0447174	-0.0765416	0.480067	0.51789
	ENSG00000054392	HHAT	-0.321051	2.41834e-05	4.52803e-05	0.0044115	0.950252	0.956457
	ENSG00000054523	KIF1B	0.363403	2.23139e-09	5.54011e-09	0.20909	0.00182105	0.00259342
	ENSG00000054598	FOXC1	1.58463	2.53746e-14	8.28762e-14	3.13898	1.50173e-62	1.07848e-61
	ENSG00000054611	TBC1D22A	-1.02283	2.14943e-22	1.00727e-21	-0.970979	1.74396e-18	4.79508e-18
	ENSG00000054654	SYNE2	0.208527	0.000266025	0.000452888	1.0345	1.70987e-37	7.61119e-37
	ENSG00000054690	PLEKHH1	0.665049	1.83031e-10	4.84613e-10	0.220732	0.0217152	0.0280578
	ENSG00000054793	ATP9A	0.022398	0.911396	0.925118	-0.673102	0.00168314	0.00240336
	ENSG00000054796	SPO11	1.74591	3.61209e-32	2.41706e-31	1.72201	5.80646e-30	2.1672e-29
	ENSG00000054965	FAM168A	-1.05409	6.63922e-46	7.05901e-45	-1.63829	4.43877e-84	4.41868e-83
	ENSG00000054967	RELT	0.159685	0.00926608	0.013489	-0.920119	1.08584e-32	4.33755e-32
	ENSG00000054983	GALC	-0.317973	1.05729e-06	2.1958e-06	-0.0446883	0.512563	0.549419
	ENSG00000055044	NOP58	0.9848	2.72577e-36	2.10256e-35	0.756128	3.00092e-19	8.44846e-19
	ENSG00000055070	C1orf144	0.259072	8.52571e-14	2.71692e-13	0.546087	1.78513e-58	1.18734e-57
	ENSG00000055118	KCNH2	-0.0178548	0.88721	0.9047	-0.0482425	0.701196	0.72985
	ENSG00000055130	CUL1	0.653786	9.2282e-28	5.30382e-27	1.90715	1.55188e-140	3.25894e-139
	ENSG00000055147	FAM114A2	-0.293618	9.23608e-08	2.05706e-07	-0.303496	1.69078e-08	3.25067e-08
	ENSG00000055163	CYFIP2	0.586843	9.64193e-10	2.44965e-09	1.82265	4.40745e-46	2.3427e-45
	ENSG00000055208	TAB2	0.554865	3.89539e-20	1.65863e-19	0.845543	2.94746e-39	1.35852e-38
	ENSG00000055211	C6orf72	-0.0555487	0.14477	0.177086	0.21408	2.84085e-08	5.40618e-08
	ENSG00000055332	EIF2AK2	1.74092	2.85757e-47	3.14101e-46	3.50354	0	0
	ENSG00000055483	USP36	0.593254	1.11197e-19	4.64325e-19	-0.1946	0.00692828	0.00940034
	ENSG00000055609	MLL3	-0.260385	0.000981801	0.00158174	-0.722796	2.55999e-15	6.40619e-15
	ENSG00000055732	MCOLN3	0.128237	0.187717	0.225234	-0.742664	5.73828e-16	1.46439e-15
	ENSG00000055813	CCDC85A	-0.027141	0.866201	0.8874	0.193503	0.251798	0.285673
	ENSG00000055917	PUM2	-0.0142362	0.724459	0.759622	0.206678	4.19023e-05	6.70222e-05
	ENSG00000055950	MRPL43	-0.492781	2.85609e-11	7.95374e-11	-0.822567	5.53747e-27	1.92684e-26
	ENSG00000055955	ITIH4	-0.0583562	0.788649	0.818773	1.5258	1.59122e-13	3.7397e-13
	ENSG00000055957	ITIH1	0.240936	0.0326196	0.0442617	0.340993	0.00480655	0.0066152
	ENSG00000056050	C4orf27	-1.69227	4.02678e-70	8.68633e-69	-1.09759	5.63161e-31	2.15465e-30
	ENSG00000056097	ZFR	0.706517	6.32805e-50	7.43696e-49	0.883671	1.68042e-63	1.22504e-62
	ENSG00000056277	ZNF280C	0.415052	2.60613e-25	1.37277e-24	0.663797	4.89428e-67	3.75663e-66
	ENSG00000056487	PHF21B	0.707326	0.000335684	0.000566318	0.511024	0.0120765	0.0160319
	ENSG00000056558	TRAF1	3.10703	4.59717e-108	2.82811e-106	4.65394	2.78089e-227	1.48499e-225
	ENSG00000056586	RC3H2	0.319287	1.42765e-11	4.04509e-11	0.417746	9.95711e-16	2.52337e-15
	ENSG00000056661	PCGF2	-0.347298	0.0553513	0.0726786	0.91493	1.118e-07	2.06425e-07
	ENSG00000056736	IL17RB	0.275693	0.0243231	0.0336112	0.473837	0.000486074	0.000722372
	ENSG00000056972	TRAF3IP2	2.13299	2.95218e-146	5.51651e-144	3.84941	0	0
	ENSG00000057019	DCBLD2	-0.0140763	0.815536	0.842067	-0.841451	3.21404e-31	1.23825e-30
	ENSG00000057149	SERPINB3	0.0389874	0.5075	0.555837	-0.0101271	0.881602	0.894889
	ENSG00000057252	SOAT1	0.98811	2.35203e-60	3.76451e-59	0.332174	5.38966e-08	1.01099e-07
	ENSG00000057468	MSH4	1.27307	3.17851e-15	1.08508e-14	1.26384	2.9496e-10	6.13642e-10
	ENSG00000057593	F7	-0.103596	0.137221	0.168375	0.846998	1.42829e-28	5.17088e-28
	ENSG00000057608	GDI2	0.167283	0.000131898	0.000231561	0.294867	7.87863e-12	1.73799e-11
	ENSG00000057657	PRDM1	1.57766	9.73758e-79	2.73109e-77	1.33812	2.2969e-47	1.25249e-46
	ENSG00000057663	ATG5	0.128781	0.000186523	0.000322686	-0.252307	1.70695e-09	3.43735e-09
	ENSG00000057704	TMCC3	0.713648	8.33124e-06	1.6174e-05	-0.228372	0.180317	0.209389
	ENSG00000057757	PITHD1	-1.09511	2.15585e-43	2.14423e-42	-2.32845	2.23434e-179	7.29429e-178
	ENSG00000057935	MTA3	-0.0871966	0.400366	0.449262	1.3016	4.90915e-17	1.29228e-16
	ENSG00000058056	USP13	0.0449479	0.678132	0.717032	-0.539815	3.17696e-06	5.42103e-06
	ENSG00000058063	ATP11B	0.404699	3.26726e-07	7.04083e-07	0.5872	1.35602e-11	2.96377e-11
	ENSG00000058085	LAMC2	0.840631	5.43546e-09	1.31544e-08	1.94812	1.11053e-22	3.44138e-22
	ENSG00000058091	CDK14	0.923058	7.582e-14	2.42135e-13	1.32536	1.13118e-25	3.79566e-25
	ENSG00000058262	SEC61A1	0.301946	5.55255e-09	1.34291e-08	0.71078	1.34847e-39	6.28502e-39
	ENSG00000058272	PPP1R12A	0.367728	2.41399e-14	7.89298e-14	0.353423	4.16136e-11	8.92564e-11
	ENSG00000058335	RASGRF1	-0.95656	3.28071e-08	7.54281e-08	-1.52145	1.96813e-15	4.93998e-15
	ENSG00000058404	CAMK2B	-0.140421	0.125898	0.155628	-0.0891992	0.386669	0.425006
	ENSG00000058453	CROCC	-0.532094	1.01937e-25	5.4443e-25	-0.866697	8.71137e-61	6.04139e-60
	ENSG00000058600	POLR3E	0.268495	2.58607e-07	5.60035e-07	1.46293	3.35167e-74	2.88842e-73
	ENSG00000058668	ATP2B4	-0.920328	6.0979e-24	3.05488e-23	-0.828517	1.06994e-17	2.86955e-17
	ENSG00000058673	ZC3H11A	0.285359	4.26268e-09	1.03749e-08	0.432044	5.43396e-18	1.47403e-17
	ENSG00000058729	RIOK2	-0.58939	1.50613e-07	3.30521e-07	-0.766268	6.51394e-11	1.3888e-10
	ENSG00000058799	YIPF1	-0.470643	9.12059e-18	3.49062e-17	0.104933	0.0707081	0.0865162
	ENSG00000058804	TMEM48	-0.678713	1.81528e-26	9.98217e-26	-1.15142	1.20309e-65	9.03043e-65
	ENSG00000058866	DGKG	0.569733	6.99852e-18	2.69086e-17	0.263778	9.5429e-05	0.000149034
	ENSG00000059122	FLYWCH1	-0.945399	2.70617e-39	2.31301e-38	-1.45758	1.83284e-59	1.2434e-58
	ENSG00000059145	UNKL	0.70903	5.7815e-20	2.44422e-19	0.0580098	0.479286	0.517235
	ENSG00000059377	TBXAS1	-0.0515452	0.460799	0.509579	0.131456	0.0635456	0.0781746
	ENSG00000059378	PARP12	1.46063	5.74115e-49	6.61205e-48	2.84884	5.5554e-191	2.04592e-189
	ENSG00000059573	ALDH18A1	0.04161	0.729626	0.764397	-0.587422	3.67557e-07	6.61894e-07
	ENSG00000059588	TARBP1	-0.141137	0.310335	0.357302	0.0633365	0.649653	0.681562
	ENSG00000059691	PET112	-0.654461	1.46184e-42	1.4126e-41	-1.03861	4.32535e-80	4.05725e-79
	ENSG00000059728	MXD1	0.599149	1.50512e-08	3.54219e-08	0.893812	5.09777e-20	1.46552e-19
	ENSG00000059758	CDK17	0.206892	1.89241e-05	3.57644e-05	1.17084	6.94966e-93	7.77197e-92
	ENSG00000059769	DNAJC25	0.866319	5.83912e-50	6.86775e-49	0.82373	8.55924e-36	3.67435e-35
	ENSG00000059804	SLC2A3	1.64475	2.53802e-58	3.85186e-57	0.945453	1.47144e-16	3.82094e-16
	ENSG00000059915	PSD	-0.745598	1.14182e-38	9.55184e-38	-0.50495	9.79554e-18	2.63186e-17
	ENSG00000060069	CTDP1	0.33237	2.33055e-15	8.0109e-15	0.222552	2.37017e-05	3.85036e-05
	ENSG00000060138	CSDA	0.859629	1.61663e-71	3.6506e-70	1.10797	5.95168e-143	1.28784e-141
	ENSG00000060237	WNK1	-0.639753	8.11853e-21	3.55385e-20	-0.837293	1.06438e-31	4.14767e-31
	ENSG00000060339	CCAR1	0.606404	1.62241e-15	5.63248e-15	0.753819	6.21119e-15	1.53402e-14
	ENSG00000060491	OGFR	0.684286	5.85977e-14	1.88301e-13	1.64138	2.43945e-69	1.95156e-68
	ENSG00000060558	GNA15	0.205546	0.000588248	0.000967831	0.033576	0.624943	0.657715
	ENSG00000060642	PIGV	0.367341	8.94037e-08	1.99477e-07	0.99246	3.9575e-52	2.33147e-51
	ENSG00000060656	PTPRU	-0.0590363	0.629309	0.67144	0.377782	0.00570903	0.00780127
	ENSG00000060688	SNRNP40	-0.189416	9.83578e-06	1.89747e-05	-0.562645	5.93941e-18	1.60802e-17
	ENSG00000060709	RIMBP2	0.207944	0.17699	0.213203	-0.0643473	0.699772	0.72857
	ENSG00000060718	COL11A1	-0.551217	8.99967e-08	2.0065e-07	-1.20814	5.01963e-27	1.74909e-26
	ENSG00000060749	QSER1	-0.813543	2.10702e-38	1.73542e-37	-1.82857	2.46036e-161	6.46525e-160
	ENSG00000060762	BRP44L	-0.339794	4.04583e-09	9.8648e-09	-0.0923649	0.133369	0.157826
	ENSG00000060971	ACAA1	-0.119849	0.0363571	0.048995	0.0537613	0.362229	0.400151
	ENSG00000060982	BCAT1	0.541013	5.35718e-14	1.72484e-13	0.473186	3.25644e-09	6.47133e-09
	ENSG00000061273	HDAC7	0.005808	0.921654	0.933899	1.43846	5.57334e-60	3.81734e-59
	ENSG00000061455	PRDM6	-0.179248	0.200275	0.239054	-0.445514	0.00133243	0.00192043
	ENSG00000061656	SPAG4	0.603668	0.000997781	0.0016061	2.19734	7.61134e-24	2.4338e-23
	ENSG00000061676	NCKAP1	0.49995	1.25913e-08	2.97874e-08	0.492843	2.66332e-07	4.8281e-07
	ENSG00000061794	MRPS35	-0.171245	0.0018366	0.00287762	-0.551879	2.68152e-19	7.56635e-19
	ENSG00000061918	GUCY1B3	0.970588	4.20393e-11	1.15992e-10	1.30784	4.53476e-20	1.30553e-19
	ENSG00000061936	SFSWAP	0.214545	6.94322e-08	1.56035e-07	0.107809	0.00389083	0.00539864
	ENSG00000061938	TNK2	-0.844408	2.63319e-27	1.49274e-26	-0.33464	1.87021e-07	3.41558e-07
	ENSG00000061987	MON2	-0.061976	0.131122	0.161528	0.0841981	0.0518797	0.0643365
	ENSG00000062038	CDH3	-0.738046	1.11987e-06	2.31966e-06	0.240429	0.148985	0.175114
	ENSG00000062194	GPBP1	0.800941	5.2946e-84	1.73954e-82	2.02149	3.83197314914471e-320	4.77464052009689e-318
	ENSG00000062282	DGAT2	1.47124	3.66713e-28	2.13473e-27	2.5159	1.67436e-48	9.35192e-48
	ENSG00000062370	ZNF285,ZFP112	-0.782263	2.6237e-26	1.4325e-25	-0.937056	1.34981e-27	4.78596e-27
	ENSG00000062485	CS	-0.0071869	0.835817	0.860156	-0.13883	7.51311e-05	0.000118062
	ENSG00000062524	LTK	0.0355619	0.767956	0.799901	0.287165	0.024136	0.0310543
	ENSG00000062582	MRPS24	0.795301	8.35418e-13	2.51331e-12	2.13595	9.95334e-80	9.26664e-79
	ENSG00000062598	ELMO2	0.516175	2.96804e-11	8.25167e-11	2.12266	1.18346e-109	1.69331e-108
	ENSG00000062650	WAPAL	0.193744	8.4902e-08	1.89688e-07	0.214847	1.18963e-07	2.19352e-07
	ENSG00000062716	VMP1	0.361271	1.15409e-14	3.82708e-14	0.36323	8.61971e-14	2.04639e-13
	ENSG00000062725	APPBP2	0.130233	0.0160285	0.0226625	-0.18494	0.00443432	0.00612037
	ENSG00000062822	POLD1	-1.3791	1.15398e-51	1.42569e-50	-1.58793	1.33537e-60	9.23517e-60
	ENSG00000063015	SEZ6	0.387151	0.000399658	0.000669561	0.154189	0.198523	0.229107
	ENSG00000063046	EIF4B	-0.276576	4.92276e-07	1.04695e-06	-0.510397	1.48097e-16	3.84434e-16
	ENSG00000063127	SLC6A16	0.528642	0.00142416	0.00225981	0.0893373	0.637151	0.669714
	ENSG00000063169	GLTSCR1	0.0631866	0.380071	0.429065	0.01018	0.900744	0.911535
	ENSG00000063176	SPHK2	-1.08166	1.2064e-64	2.19665e-63	-1.47668	1.40938e-94	1.62601e-93
	ENSG00000063177	RPL18	0.141408	0.282712	0.327974	0.122929	0.341876	0.379237
	ENSG00000063180	CA11	-0.26253	0.00665934	0.00984771	0.0168151	0.863907	0.879255
	ENSG00000063241	ISOC2	-0.357058	0.0175811	0.0247429	-0.494519	0.000830658	0.00121325
	ENSG00000063244	U2AF2	0.104043	0.0168983	0.0238246	-0.292534	2.06889e-08	3.96184e-08
	ENSG00000063245	EPN1	-0.729996	4.37842e-17	1.63265e-16	-1.02085	1.39429e-29	5.15007e-29
	ENSG00000063322	MED29	-0.75055	8.66055e-45	8.95962e-44	-0.87915	5.24122e-58	3.45684e-57
	ENSG00000063438	AHRR	-0.341891	1.08155e-09	2.73805e-09	-1.12637	1.36185e-63	9.95231e-63
	ENSG00000063587	ZNF275	-0.082694	0.297018	0.343158	-0.297698	0.000805137	0.00117781
	ENSG00000063601	MTMR1	-0.551674	5.96165e-22	2.74218e-21	-0.387939	5.98838e-09	1.17504e-08
	ENSG00000063660	GPC1	1.44196	1.30442e-37	1.05007e-36	0.30767	0.00336373	0.00469121
	ENSG00000063761	ADCK1	-0.649046	3.88246e-13	1.18859e-12	-1.1669	4.6423e-35	1.95526e-34
	ENSG00000063854	HAGH	-0.400726	1.93235e-10	5.10907e-10	-0.716015	7.30985e-23	2.27844e-22
	ENSG00000063978	RNF4	0.353398	8.97525e-14	2.85167e-13	0.388716	6.74901e-12	1.49454e-11
	ENSG00000064012	CASP8	-0.606204	1.43502e-12	4.26061e-12	0.907018	1.61158e-23	5.11167e-23
	ENSG00000064042	LIMCH1	0.214728	0.0571239	0.0748549	0.68999	8.46764e-09	1.64897e-08
	ENSG00000064102	ASUN	-0.417918	1.22355e-14	4.05204e-14	-0.38268	1.71749e-11	3.73743e-11
	ENSG00000064115	TM7SF3	-0.346088	1.12636e-06	2.33213e-06	-0.302681	3.94625e-05	6.32009e-05
	ENSG00000064199	SPA17	-0.724959	1.04312e-14	3.46371e-14	-0.425003	2.30772e-05	3.75218e-05
	ENSG00000064201	TSPAN32	-0.300477	2.64769e-06	5.33859e-06	-0.488958	2.07693e-11	4.50847e-11
	ENSG00000064225	ST3GAL6	0.0881326	0.28222	0.327428	-1.29666	3.9893e-29	1.46017e-28
	ENSG00000064270	ATP2C2	0.119123	0.0632942	0.0823414	1.08853	1.36429e-55	8.59622e-55
	ENSG00000064309	CDON	-0.270521	0.130998	0.161402	-0.445025	0.0152823	0.0200915
	ENSG00000064313	TAF2	-0.155317	0.234369	0.275989	-0.110367	0.42348	0.461844
	ENSG00000064393	HIPK2	1.04135	4.573e-36	3.49141e-35	0.347809	7.25801e-06	1.21484e-05
	ENSG00000064419	TNPO3	0.148788	0.152324	0.185416	0.168947	0.104585	0.125461
	ENSG00000064490	RFXANK	-0.475081	8.78476e-10	2.23529e-09	-0.485942	5.84618e-10	1.20253e-09
	ENSG00000064545	TMEM161A	-0.0731971	0.357853	0.406439	-0.147126	0.0650761	0.0799982
	ENSG00000064547	LPAR2	0.161631	0.0661954	0.0858675	-0.707296	1.14249e-14	2.8004e-14
	ENSG00000064601	CTSA	0.0515853	0.415394	0.464382	0.385268	9.36546e-10	1.90806e-09
	ENSG00000064607	SUGP2	-0.101669	0.00242816	0.00375645	-0.413509	3.0441e-38	1.37925e-37
	ENSG00000064651	SLC12A2	-0.0652192	0.288514	0.334185	-0.58577	8.42656e-16	2.14057e-15
	ENSG00000064652	SNX24	-1.41574	4.60349e-70	9.88759e-69	-1.58063	5.84623e-84	5.80046e-83
	ENSG00000064655	EYA2	-0.702409	7.28548e-13	2.19933e-12	-0.802671	6.74408e-14	1.60672e-13
	ENSG00000064666	CNN2	-0.636679	5.45454e-20	2.31057e-19	0.00545917	0.940269	0.947812
	ENSG00000064687	ABCA7	-0.111734	0.213846	0.253673	0.603639	4.08696e-10	8.45204e-10
	ENSG00000064692	SNCAIP	-0.289974	0.0106569	0.0154146	-1.14104	1.42505e-22	4.40416e-22
	ENSG00000064703	DDX20	0.35495	1.92516e-10	5.09097e-10	0.67312	1.46377e-31	5.68474e-31
	ENSG00000064726	BTBD1	-0.332686	1.60578e-28	9.46559e-28	-0.807858	6.45114e-145	1.43752e-143
	ENSG00000064763	FAR2	0.196887	0.00309864	0.00473297	0.390669	5.04209e-08	9.4746e-08
	ENSG00000064835	POU1F1	-0.277422	0.0117989	0.0169696	-0.215196	0.0632462	0.077819
	ENSG00000064886	CHI3L2	2.49726	5.80433e-53	7.44159e-52	4.22819	9.14477e-156	2.29417e-154
	ENSG00000064932	SBNO2	1.83324	1.09986e-143	1.98094e-141	2.62618	0	0
	ENSG00000064933	PMS1	-0.529478	0.000133564	0.000234376	-0.425892	0.00361587	0.00502925
	ENSG00000064961	HMG20B	0.0933754	0.325264	0.372824	-0.45206	1.81421e-06	3.1385e-06
	ENSG00000064989	CALCRL	0.580782	6.72389e-08	1.51333e-07	1.16133	7.82981e-21	2.30728e-20
	ENSG00000064995	TAF11	-0.24494	1.64745e-08	3.86622e-08	-0.495605	3.94666e-20	1.1392e-19
	ENSG00000064999	ANKS1A	-0.531843	4.76196e-07	1.01376e-06	-0.233119	0.00870338	0.0117047
	ENSG00000065000	AP3D1	0.469049	2.79284e-27	1.58085e-26	0.389254	4.81471e-14	1.1559e-13
	ENSG00000065029	ZNF76	-0.401955	9.40564e-19	3.76755e-18	-0.411522	1.43506e-17	3.83709e-17
	ENSG00000065054	SLC9A3R2	-0.521158	0.000853941	0.0013844	-1.84655	1.38584e-30	5.26449e-30
	ENSG00000065057	NTHL1	-1.22419	2.52136e-11	7.04387e-11	-1.2839	9.19782e-13	2.10445e-12
	ENSG00000065060	UHRF1BP1	0.240552	0.00202912	0.00316466	0.970906	1.05187e-31	4.09998e-31
	ENSG00000065135	GNAI3	0.400218	3.26617e-40	2.87889e-39	0.526882	2.17166e-46	1.15925e-45
	ENSG00000065150	IPO5	0.856406	7.85544e-65	1.43911e-63	1.33179	1.52691e-172	4.58439e-171
	ENSG00000065154	OAT	0.46763	4.14353e-15	1.40712e-14	0.189614	0.00281124	0.00394645
	ENSG00000065183	WDR3	0.529902	9.33967e-13	2.80359e-12	-0.229854	0.00283578	0.0039794
	ENSG00000065243	PKN2	-0.0671318	0.38602	0.434894	0.724016	1.4009e-17	3.74642e-17
	ENSG00000065268	WDR18	-0.133742	0.223169	0.263936	-0.345567	0.00108905	0.00157694
	ENSG00000065308	TRAM2	-0.496516	2.16791e-08	5.04562e-08	-0.732413	8.74476e-16	2.21952e-15
	ENSG00000065320	NTN1	0.604333	2.62106e-09	6.47748e-09	1.01749	1.24651e-19	3.54062e-19
	ENSG00000065328	MCM10	-0.435783	0.00209456	0.00326298	-0.751316	4.84367e-08	9.10861e-08
	ENSG00000065357	DGKA	-0.337614	9.4769e-08	2.10976e-07	-0.440411	1.58682e-10	3.33935e-10
	ENSG00000065371	ROPN1	-0.412401	0.0088536	0.0129162	-0.447047	0.00510631	0.00701549
	ENSG00000065413	ANKRD44	-0.606588	8.06848e-07	1.68528e-06	-0.158655	0.248405	0.28208
	ENSG00000065427	KARS	0.406044	4.90368e-09	1.18963e-08	0.967536	7.92401e-43	3.9546e-42
	ENSG00000065457	ADAT1	-0.358942	1.41853e-11	4.02156e-11	-0.224047	4.62785e-05	7.38165e-05
	ENSG00000065485	PDIA5	0.733542	4.02306e-18	1.56862e-17	1.42848	2.22118e-57	1.44711e-56
	ENSG00000065491	TBC1D22B	0.999767	2.59326e-106	1.53836e-104	1.3057	4.17362e-121	6.92608e-120
	ENSG00000065518	NDUFB4	0.202041	4.66234e-06	9.21313e-06	0.296741	5.76711e-14	1.37902e-13
	ENSG00000065526	SPEN	0.14046	0.134804	0.165668	-0.178633	0.0732063	0.0894119
	ENSG00000065534	MYLK	0.195348	9.2243e-06	1.78434e-05	0.202349	0.000167951	0.000258222
	ENSG00000065548	ZC3H15	0.507215	6.15841e-36	4.67558e-35	0.127887	0.00828063	0.0111643
	ENSG00000065559	MAP2K4	0.00239379	0.940666	0.949619	-0.223608	7.80816e-12	1.72296e-11
	ENSG00000065600	TMEM206	0.159211	0.00818956	0.0119919	-1.52333	1.45185e-83	1.43193e-82
	ENSG00000065613	SLK	0.233583	2.74373e-07	5.93231e-07	0.453385	7.86577e-16	1.99981e-15
	ENSG00000065615	CYB5R4	0.0198089	0.696306	0.733612	-0.035802	0.488905	0.526194
	ENSG00000065618	COL17A1	0.187979	0.104442	0.131047	-0.0185179	0.870174	0.88467
	ENSG00000065621	GSTO2	0.307141	0	0	-0.450387	0	0
	ENSG00000065665	SEC61A2	-0.424561	1.45526e-14	4.80343e-14	-0.635084	3.33141e-28	1.1971e-27
	ENSG00000065717	TLE2	-0.0580064	0.328799	0.376501	-0.216766	0.00216376	0.0030634
	ENSG00000065802	ASB1	-0.36923	2.59589e-10	6.80925e-10	-0.892887	7.32578e-38	3.2854e-37
	ENSG00000065809	FAM107B	1.44762	3.12829e-91	1.24375e-89	1.51839	3.75316e-62	2.67863e-61
	ENSG00000065833	ME1	-0.452878	7.86083e-13	2.36918e-12	-0.467195	5.3218e-11	1.13722e-10
	ENSG00000065882	TBC1D1	0.294419	1.26176e-08	2.9845e-08	0.623198	7.56378e-34	3.09506e-33
	ENSG00000065883	CDK13	-0.193687	0.00105122	0.00168812	-0.472783	5.19232e-14	1.24436e-13
	ENSG00000065911	MTHFD2	1.00672	7.33614e-62	1.23361e-60	1.56794	1.60383e-137	3.23624e-136
	ENSG00000065923	SLC9A7	-0.476629	1.62307e-10	4.31117e-10	-0.528194	9.68195e-11	2.05311e-10
	ENSG00000065970	FOXJ2	-0.734941	1.02866e-39	8.91442e-39	-1.43879	2.50904e-92	2.77479e-91
	ENSG00000065978	YBX1	0.282736	5.10602e-13	1.55268e-12	0.327169	7.63262e-15	1.88291e-14
	ENSG00000065989	PDE4A	0.257717	0.000148117	0.000258486	-0.244323	0.0042473	0.00587036
	ENSG00000066027	PPP2R5A	0.651376	9.88433e-35	7.21137e-34	-0.506686	6.88474e-19	1.91839e-18
	ENSG00000066032	CTNNA2	0.142019	0.488231	0.537054	0.734867	0.00078676	0.00115138
	ENSG00000066044	ELAVL1	-0.0190964	0.474787	0.523461	-0.351585	8.0034e-26	2.6952e-25
	ENSG00000066056	TIE1	-0.0766206	0.488073	0.53692	0.042373	0.697449	0.726405
	ENSG00000066084	DIP2B	0.796546	1.3086e-25	6.96165e-25	1.92884	2.57749e-140	5.39756e-139
	ENSG00000066117	SMARCD1	0.0930403	0.00151195	0.00239016	0.00857167	0.787297	0.809382
	ENSG00000066135	KDM4A	-0.403351	1.26132e-13	3.97793e-13	0.070294	0.267256	0.301745
	ENSG00000066136	NFYC	-0.0078179	0.758076	0.790602	-0.27386	1.21132e-18	3.34472e-18
	ENSG00000066185	ZMYND12	-0.524933	1.5223e-10	4.0536e-10	-0.239061	0.00649798	0.00883494
	ENSG00000066230	SLC9A3	-0.705933	4.03558e-05	7.41584e-05	-1.1516	1.81328e-09	3.64706e-09
	ENSG00000066279	ASPM	-0.223293	0.00236248	0.00366014	0.0836041	0.339243	0.376563
	ENSG00000066294	CD84	-0.10731	0.117295	0.145831	0.416919	5.78467e-08	1.08373e-07
	ENSG00000066322	ELOVL1	-0.314139	2.21264e-12	6.50861e-12	-0.800509	9.51215e-58	6.24344e-57
	ENSG00000066336	SPI1	-0.20475	0.000120537	0.000212489	-1.2051	6.67267e-77	5.95996e-76
	ENSG00000066382	MPPED2	0.366247	0.0137422	0.0196023	0.985725	3.89767e-11	8.36847e-11
	ENSG00000066422	ZBTB11	-0.145972	0.0135508	0.0193422	-0.158484	0.00800046	0.0108051
	ENSG00000066427	ATXN3	0.173305	2.09934e-05	3.95401e-05	0.0187328	0.694113	0.723283
	ENSG00000066455	GOLGA5	0.258625	5.41524e-11	1.48292e-10	0.346246	5.08818e-11	1.08855e-10
	ENSG00000066557	LRRC40	0.35431	1.38326e-09	3.4818e-09	0.600221	2.90852e-22	8.92981e-22
	ENSG00000066583	ISOC1	0.719236	6.60775e-33	4.51459e-32	1.02078	5.48896e-68	4.27898e-67
	ENSG00000066629	EML1	1.94909	1.05936e-20	4.61569e-20	3.2164	8.89766e-44	4.53744e-43
	ENSG00000066651	TRMT11	0.368816	0.0692713	0.0895638	0.817963	0.000167638	0.000257793
	ENSG00000066654	THUMPD1	-0.0065959	0.879792	0.898546	-0.050516	0.311414	0.347923
	ENSG00000066697	MSANTD3	1.64345	6.32188e-99	3.10874e-97	1.75357	1.30034e-96	1.54799e-95
	ENSG00000066739	ATG2B	0.354217	1.81193e-09	4.51594e-09	0.410801	2.18395e-11	4.73595e-11
	ENSG00000066777	ARFGEF1	0.0907937	0.00133306	0.00212135	0.142927	1.32752e-05	2.18868e-05
	ENSG00000066813	ACSM2B	-0.0428886	0.693173	0.731022	-0.126281	0.224269	0.25666
	ENSG00000066827	ZFAT	0.0296043	0.569909	0.615842	0.310888	6.20729e-08	1.16145e-07
	ENSG00000066855	MTFR1	1.11114	3.67284e-50	4.36449e-49	2.14351	7.98024e-107	1.0877e-105
	ENSG00000066923	STAG3	-0.133505	0.193741	0.231773	0.114928	0.267626	0.30214
	ENSG00000066926	FECH	-0.625785	2.58029e-29	1.56418e-28	-1.00013	4.27562e-49	2.41151e-48
	ENSG00000066933	MYO9A	-0.788096	5.4692e-21	2.4068e-20	-1.20836	7.23953e-44	3.70404e-43
	ENSG00000067048	DDX3Y	1.07361	2.00846e-68	4.09611e-67	1.08003	1.92784e-52	1.13933e-51
	ENSG00000067057	PFKP	1.56514	1.13816e-108	7.24016e-107	2.22271	7.17037e-223	3.67162e-221
	ENSG00000067064	IDI1	0.97196	1.31751e-42	1.27644e-41	0.930725	6.35997e-29	2.31655e-28
	ENSG00000067066	SP100	0.383055	6.31348e-11	1.7229e-10	1.77412	0	0
	ENSG00000067082	KLF6	1.28749	5.02358e-55	6.896e-54	1.10226	3.59531e-28	1.29006e-27
	ENSG00000067113	PPAP2A	0.913302	1.46358e-13	4.59546e-13	1.26736	7.13379e-22	2.16446e-21
	ENSG00000067141	NEO1	-0.458667	0.017472	0.0246011	-1.06376	2.48592e-08	4.74282e-08
	ENSG00000067167	TRAM1	0.295004	0.00132143	0.00210417	0.763758	1.29005e-16	3.35983e-16
	ENSG00000067177	PHKA1	0.307888	0.000667229	0.00109261	-0.0720815	0.502592	0.539465
	ENSG00000067182	TNFRSF1A	-0.08675	0.142685	0.174693	0.0367151	0.58889	0.623413
	ENSG00000067191	CACNB1	0.197507	0.0226251	0.0313954	2.98207	2.04562e-209	8.86554e-208
	ENSG00000067208	EVI5	-0.453459	1.82248e-19	7.53645e-19	-0.841536	8.18721e-55	5.0858e-54
	ENSG00000067221	STOML1	0.758908	1.04732e-09	2.65363e-09	2.4886	9.87932e-101	1.24655e-99
	ENSG00000067225	PKM2	0.192564	0.00120554	0.001926	0.059198	0.352218	0.389841
	ENSG00000067248	DHX29	-0.289567	6.82894e-22	3.13339e-21	-0.48691	5.03984e-33	2.02951e-32
	ENSG00000067334	DNTTIP2	1.13497	3.99595e-103	2.18012e-101	0.34976	4.70992e-10	9.71348e-10
	ENSG00000067365	METTL22	0.104117	0.0210048	0.029283	-0.0338435	0.479856	0.517768
	ENSG00000067369	TP53BP1	-0.0869439	0.41788	0.466952	-0.438102	0.000443298	0.000660639
	ENSG00000067445	TRO	-0.0937009	0.207165	0.246491	0.345806	1.05993e-06	1.8612e-06
	ENSG00000067533	RRP15	0.593141	4.9088e-20	2.08352e-19	-0.18204	0.019588	0.0254568
	ENSG00000067560	RHOA	0.0271457	0.210601	0.250141	0.159214	4.43923e-10	9.17168e-10
	ENSG00000067596	DHX8	0.310389	1.2251e-15	4.27399e-15	0.622982	1.42789e-34	5.95036e-34
	ENSG00000067606	PRKCZ	0.0126064	0.886572	0.904296	0.62228	9.66895e-10	1.96828e-09
	ENSG00000067646	ZFY	0.488363	4.66323e-15	1.57895e-14	0.832552	1.14241e-24	3.73363e-24
	ENSG00000067704	IARS2	-0.457795	3.38654e-28	1.97601e-27	-0.648722	2.34227e-40	1.11109e-39
	ENSG00000067715	SYT1	0.112565	0.572856	0.618447	-0.112012	0.586245	0.620964
	ENSG00000067829	IDH3G	-0.304316	0.000375446	0.000630622	-0.26934	0.000970645	0.00141096
	ENSG00000067836	ROGDI	-0.824844	6.20846e-12	1.78481e-11	-0.636673	1.79245e-07	3.27717e-07
	ENSG00000067900	ROCK1	0.0906882	0.0159748	0.0225908	-0.0025192	0.953815	0.959785
	ENSG00000067955	CBFB	-0.272548	1.37559e-05	2.62962e-05	-1.25525	2.5467e-98	3.08826e-97
	ENSG00000067992	PDK3	-0.762474	4.69018e-28	2.71758e-27	0.0336075	0.622082	0.655026
	ENSG00000068001	HYAL2	-0.600845	2.46677e-12	7.24189e-12	-2.18928	5.01705e-85	5.05491e-84
	ENSG00000068024	HDAC4	-0.482825	2.16951e-13	6.74965e-13	-0.856476	4.39759e-35	1.85376e-34
	ENSG00000068028	RASSF1	-0.97626	2.93454e-49	3.39802e-48	-1.70784	3.05999e-84	3.04816e-83
	ENSG00000068078	FGFR3	1.12892	2.25508e-15	7.76399e-15	3.73572	2.27889e-106	3.08641e-105
	ENSG00000068079	IFI35	1.34341	1.42207e-25	7.55994e-25	3.73768	1.83248e-199	7.34562e-198
	ENSG00000068097	HEATR6	0.0865875	0.277234	0.322043	0.686132	7.56819e-17	1.98213e-16
	ENSG00000068120	COASY	-0.146071	0.0323438	0.0438994	0.511375	9.13659e-12	2.01075e-11
	ENSG00000068137	PLEKHH3	-2.03492	4.44984e-77	1.19427e-75	-2.71635	2.62204e-96	3.10656e-95
	ENSG00000068305	MEF2A	-0.543156	2.83724e-13	8.76501e-13	-0.589386	2.33277e-13	5.44568e-13
	ENSG00000068308	OTUD5	0.145755	0.00162096	0.00255447	0.285112	1.6208e-10	3.40991e-10
	ENSG00000068323	TFE3	-0.177968	1.90654e-06	3.88507e-06	-0.670955	5.34778e-67	4.10051e-66
	ENSG00000068354	TBC1D25	0.33528	1.21463e-18	4.84199e-18	0.0849621	0.0350301	0.0442485
	ENSG00000068366	ACSL4	1.62687	8.4126e-98	3.99238e-96	2.15322	2.14525e-141	4.55622e-140
	ENSG00000068383	INPP5A	0.126882	0.0421745	0.0563068	-0.130633	0.087503	0.105956
	ENSG00000068394	GPKOW	-0.108773	0.0577761	0.0756433	0.00175873	0.977574	0.980459
	ENSG00000068400	GRIPAP1	-0.0797331	0.0371587	0.050015	0.423248	9.49575e-25	3.11224e-24
	ENSG00000068438	FTSJ1	-0.0957121	0.171655	0.207242	-0.72493	3.05587e-21	9.1055e-21
	ENSG00000068489	PRR11	-0.491953	4.19305e-08	9.5756e-08	-0.551847	4.80765e-08	9.04201e-08
	ENSG00000068615	REEP1	1.09801	2.47597e-09	6.13312e-09	2.84155	6.26305e-43	3.13195e-42
	ENSG00000068650	ATP11A	-0.310455	0.000732469	0.00119486	-0.552887	6.59637e-10	1.35442e-09
	ENSG00000068654	POLR1A	0.212114	0.0180695	0.0253825	0.192449	0.0443958	0.0554188
	ENSG00000068697	LAPTM4A	-0.220206	4.08621e-06	8.11435e-06	-0.2946	2.74236e-08	5.22475e-08
	ENSG00000068724	TTC7A	-1.77168	7.08732e-99	3.43988e-97	-1.93838	1.42784e-91	1.56288e-90
	ENSG00000068745	IP6K2	0.360306	4.12521e-13	1.26007e-12	0.4032	2.06939e-18	5.67735e-18
	ENSG00000068784	SRBD1	-0.74547	2.56095e-22	1.19375e-21	-0.279071	0.000606446	0.000894591
	ENSG00000068793	CYFIP1	-0.342778	4.19352e-06	8.3175e-06	-0.264269	0.0004066	0.000608191
	ENSG00000068796	KIF2A	0.186906	0.000385432	0.000646742	0.0164859	0.766598	0.791041
	ENSG00000068831	RASGRP2	-0.484577	3.41278e-15	1.16319e-14	0.415982	1.43133e-06	2.49344e-06
	ENSG00000068878	PSME4	0.105579	0.113851	0.141853	-0.0808043	0.242794	0.276233
	ENSG00000068885	IFT80	0.668094	7.78487e-13	2.34771e-12	0.540621	4.93387e-10	1.01697e-09
	ENSG00000068903	SIRT2	-0.101	0.0199821	0.0279275	-0.168219	0.000574733	0.000849319
	ENSG00000068912	ERLEC1	-0.148374	0.000778395	0.00126605	0.138492	0.00772124	0.0104412
	ENSG00000068971	PPP2R5B	-0.130137	0.105593	0.132414	-0.214046	0.00661103	0.00898457
	ENSG00000068976	PYGM	-0.173215	0.00164308	0.00258579	0.390967	1.57903e-08	3.03857e-08
	ENSG00000069011	PITX1	-1.34996	3.65014e-10	9.48479e-10	-1.83007	8.807e-18	2.37009e-17
	ENSG00000069020	MAST4	0.328577	1.63467e-05	3.10346e-05	1.36092	1.95071e-65	1.46127e-64
	ENSG00000069122	GPR116	0.0283908	0.777266	0.808415	-1.29938	2.23777e-36	9.74065e-36
	ENSG00000069188	SDK2	-0.186358	0.118772	0.14753	-0.0827779	0.495078	0.532164
	ENSG00000069206	ADAM7	0.0303865	0.889667	0.90702	0.705347	0.00439017	0.00606335
	ENSG00000069248	NUP133	-0.521417	1.57835e-49	1.83616e-48	-0.635899	3.25108e-55	2.03305e-54
	ENSG00000069275	NUCKS1	-0.617696	1.5982e-30	1.00893e-29	-0.666336	1.83465e-30	6.93944e-30
	ENSG00000069329	VPS35	-0.134656	6.7675e-06	1.32297e-05	-0.161877	1.92592e-06	3.32714e-06
	ENSG00000069345	DNAJA2	0.238744	2.14786e-11	6.02974e-11	0.138921	5.8985e-05	9.32978e-05
	ENSG00000069399	BCL3	1.53419	2.06864e-61	3.43601e-60	2.76294	2.66126e-281	2.32697e-279
	ENSG00000069424	KCNAB2	-1.04103	4.7957e-91	1.90161e-89	-1.96028	1.46567e-132	2.78106e-131
	ENSG00000069431	ABCC9	0.628612	0.000243907	0.0004168	1.25582	5.93538e-12	1.31729e-11
	ENSG00000069482	GAL	1.67012	5.70952e-09	1.37909e-08	0.468992	0.108741	0.130207
	ENSG00000069493	CLEC2D	0.748404	6.21637e-16	2.19637e-15	2.72528	2.38572e-189	8.53379e-188
	ENSG00000069509	FUNDC1	-0.342748	6.28654e-11	1.71617e-10	0.103551	0.110011	0.131633
	ENSG00000069667	RORA	0.206417	0.030246	0.0412092	-0.251892	0.0115831	0.015407
	ENSG00000069696	DRD4	-0.705335	0.000965227	0.00155621	-0.656653	0.000976267	0.00141858
	ENSG00000069702	TGFBR3	0.00371025	0.952158	0.95934	-0.410954	5.7213e-08	1.07212e-07
	ENSG00000069712	KIAA1107	-0.589974	8.45046e-07	1.76334e-06	-1.0075	1.70777e-12	3.86477e-12
	ENSG00000069849	ATP1B3	0.629237	1.77305e-36	1.37547e-35	0.564058	1.80482e-29	6.65326e-29
	ENSG00000069869	NEDD4	-0.188447	0.110534	0.138112	1.78015	1.04681e-69	8.40597e-69
	ENSG00000069943	PIGB	-0.925525	3.29697e-33	2.28072e-32	-0.732318	2.28471e-20	6.64222e-20
	ENSG00000069956	MAPK6	0.868116	1.82962e-25	9.69204e-25	0.568524	3.94716e-08	7.45929e-08
	ENSG00000069966	GNB5	-0.513861	1.26379e-16	4.62143e-16	-0.852429	3.45853e-36	1.49846e-35
	ENSG00000069974	RAB27A	0.183033	0.00356741	0.00541634	1.16959	6.89811e-67	5.28113e-66
	ENSG00000069998	CECR5	-0.419721	4.97322e-08	1.12917e-07	-0.610137	1.15727e-14	2.83617e-14
	ENSG00000070010	UFD1L	0.443987	5.90579e-19	2.39516e-18	0.0685747	0.192926	0.222958
	ENSG00000070018	LRP6	-1.04759	5.77839e-16	2.04452e-15	-1.54995	2.65088e-26	9.039e-26
	ENSG00000070019	GUCY2C	-0.564072	9.22758e-05	0.000164649	-0.522337	0.000517071	0.000766532
	ENSG00000070047	PHRF1	0.339217	2.25705e-08	5.24657e-08	0.171013	0.00557308	0.00762316
	ENSG00000070061	IKBKAP	-0.568186	4.79619e-23	2.31359e-22	-0.69508	9.71289e-28	3.45779e-27
	ENSG00000070081	NUCB2	0.0440265	0.505027	0.553372	0.501048	1.46858e-13	3.45472e-13
	ENSG00000070087	PFN2	0.730228	2.58764e-05	4.83291e-05	0.97854	7.82539e-09	1.52669e-08
	ENSG00000070182	SPTB	0.565635	0.00244634	0.00378183	0.782005	5.10756e-05	8.12428e-05
	ENSG00000070190	DAPP1	0.316538	7.87202e-05	0.000141322	2.0946	1.58739e-143	3.45986e-142
	ENSG00000070214	SLC44A1	0.0694119	0.16261	0.197134	0.236418	1.70284e-07	3.11638e-07
	ENSG00000070269	C14orf101	-0.0325179	0.54661	0.593239	0.293003	2.42303e-06	4.15854e-06
	ENSG00000070366	SMG6	-0.416688	1.41534e-37	1.13691e-36	-0.738175	3.69071e-86	3.76422e-85
	ENSG00000070367	EXOC5	0.378591	1.94825e-09	4.8484e-09	0.576235	1.4363e-12	3.26178e-12
	ENSG00000070371	CLTCL1	-0.484859	2.33026e-06	4.71764e-06	-0.381798	0.000304943	0.00045972
	ENSG00000070404	FSTL3	1.39862	8.64937e-29	5.14727e-28	0.832456	2.43757e-11	5.27522e-11
	ENSG00000070413	DGCR2	-0.13476	0.00713432	0.0105147	-0.386169	1.48304e-09	2.99371e-09
	ENSG00000070423	RNF126	0.319841	0.000536363	0.000885782	-0.187322	0.0563275	0.0696156
	ENSG00000070444	MNT	0.01322	0.83404	0.858563	-0.750732	3.38249e-26	1.14865e-25
	ENSG00000070476	ZXDC	-0.606783	2.98589e-32	2.00162e-31	-1.17139	4.23267e-99	5.18745e-98
	ENSG00000070495	JMJD6	0.449606	1.05367e-10	2.83911e-10	0.0720943	0.291233	0.327112
	ENSG00000070501	POLB	-0.727609	3.31378e-20	1.41334e-19	-0.617939	3.57271e-14	8.61877e-14
	ENSG00000070526	ST6GALNAC1	-0.0633641	0.46367	0.512358	-0.736702	2.2309e-16	5.76104e-16
	ENSG00000070540	WIPI1	-0.384723	0.000435362	0.000726607	-0.833553	2.97304e-13	6.9112e-13
	ENSG00000070601	FRMPD1	0.487409	0.0212475	0.0295936	0.444339	0.058151	0.0717743
	ENSG00000070610	GBA2	-0.139289	0.00474989	0.00712483	-0.430248	3.49214e-17	9.23823e-17
	ENSG00000070614	NDST1	-0.404365	3.80039e-06	7.56284e-06	-1.62762	1.12378e-81	1.0771e-80
	ENSG00000070669	ASNS	-0.440374	0.000681319	0.00111483	-0.214457	0.0989644	0.119121
	ENSG00000070718	AP3M2	1.62216	1.03025e-123	1.0477e-121	2.46426	2.24141e-257	1.66734e-255
	ENSG00000070729	CNGB1	0.248833	0.000224042	0.000384789	0.276297	5.17427e-05	8.22689e-05
	ENSG00000070731	ST6GALNAC2	0.555312	3.56728e-07	7.66979e-07	1.31557	2.3271e-30	8.77108e-30
	ENSG00000070748	CHAT	-0.512327	0.000483224	0.000802546	-0.520847	0.00158158	0.00226404
	ENSG00000070756	PABPC1	0.239408	0.00103259	0.00165963	0.640718	4.14824e-17	1.09449e-16
	ENSG00000070759	TESK2	-0.643188	3.83217e-09	9.3591e-09	-1.51653	9.55827e-41	4.57183e-40
	ENSG00000070761	C16orf80	0.190951	3.21635e-05	5.95802e-05	-0.503461	1.26024e-20	3.68821e-20
	ENSG00000070770	CSNK2A2	0.360243	5.70866e-27	3.19382e-26	0.309634	1.69203e-20	4.93067e-20
	ENSG00000070778	PTPN21	0.158327	0.0768749	0.0985509	-0.805036	6.50551e-16	1.65792e-15
	ENSG00000070785	EIF2B3	-0.203391	0.0058258	0.00865877	-0.214989	0.00685453	0.00930449
	ENSG00000070808	CAMK2A	0.22301	0.0112163	0.0161815	-0.591513	7.36728e-06	1.23286e-05
	ENSG00000070814	TCOF1	-0.468687	1.45661e-09	3.65902e-09	-0.71119	3.7831e-18	1.03051e-17
	ENSG00000070831	CDC42	0.262161	4.41521e-23	2.13395e-22	0.451926	4.41275e-48	2.4455e-47
	ENSG00000070882	OSBPL3	-0.592092	1.07583e-28	6.38196e-28	-0.325301	6.47405e-08	1.21015e-07
	ENSG00000070886	EPHA8	-0.473806	4.92344e-07	1.04695e-06	-1.1822	3.79853e-33	1.53419e-32
	ENSG00000070950	RAD18	-0.571151	1.90792e-28	1.12333e-27	-0.219488	0.000606178	0.000894284
	ENSG00000070961	ATP2B1	1.2073	7.88344e-44	7.92e-43	1.39855	3.62532e-53	2.17869e-52
	ENSG00000070985	TRPM5	-0.327878	0.0161699	0.0228537	0.131993	0.396431	0.434627
	ENSG00000071051	NCK2	1.10973	1.29762e-82	4.09244e-81	1.40226	7.55083e-113	1.13582e-111
	ENSG00000071054	MAP4K4	0.970737	6.71976e-63	1.16536e-61	2.64524	0	0
	ENSG00000071073	MGAT4A	-0.921701	1.21849e-28	7.21964e-28	-1.22407	1.97554e-68	1.5522e-67
	ENSG00000071082	RPL31	0.157918	0.0887336	0.112748	0.219702	0.0228247	0.0294456
	ENSG00000071127	WDR1	0.585085	3.91949e-44	3.97776e-43	0.714036	4.07864e-58	2.69602e-57
	ENSG00000071189	SNX13	0.308995	4.25045e-05	7.78772e-05	-0.109686	0.133972	0.158451
	ENSG00000071205	ARHGAP10	0.570367	1.63579e-13	5.11899e-13	1.03065	4.64848e-35	1.95731e-34
	ENSG00000071242	RPS6KA2	-0.664549	1.0053e-20	4.3814e-20	-0.934027	1.13984e-33	4.64638e-33
	ENSG00000071243	ING3	0.362221	1.80543e-11	5.09041e-11	0.580326	1.05378e-24	3.44774e-24
	ENSG00000071246	VASH1	-2.54901	1.31235e-86	4.6379e-85	-2.44935	1.02792e-90	1.11534e-89
	ENSG00000071282	LMCD1	1.7228	9.22915e-11	2.49532e-10	2.67303	1.42435e-20	4.16392e-20
	ENSG00000071462	WBSCR22	0.0811132	0.319159	0.366444	0.0479186	0.541413	0.577486
	ENSG00000071537	SEL1L	0.186029	0.000423221	0.000707292	0.242484	4.59931e-05	7.33801e-05
	ENSG00000071539	TRIP13	-0.155347	0.233437	0.275014	-0.378545	0.00424711	0.00587036
	ENSG00000071553	ATP6AP1	0.0505195	0.230704	0.272095	-0.0631577	0.169657	0.197686
	ENSG00000071564	TCF3	-0.268887	1.07867e-12	3.23017e-12	-1.3685	2.59388e-173	7.86688e-172
	ENSG00000071626	DAZAP1	0.221486	0.00234721	0.00363799	-0.260513	0.000278131	0.000420913
	ENSG00000071655	MBD3	-0.268523	0.00556438	0.00828835	-0.79561	3.43729e-16	8.82913e-16
	ENSG00000071794	HLTF	-1.34832	3.79156e-48	4.27774e-47	-1.91776	5.59556e-49	3.15003e-48
	ENSG00000071859	FAM50A	0.26012	0.0311124	0.042324	-0.201732	0.0934607	0.112787
	ENSG00000071889	FAM3A	-0.394532	7.17722e-05	0.000129283	-0.667132	9.05309e-11	1.92112e-10
	ENSG00000071894	CPSF1	-0.345648	2.44619e-08	5.66948e-08	-0.382895	4.17963e-08	7.88566e-08
	ENSG00000071909	MYO3B	0.34975	0.00269001	0.00413841	-0.126081	0.303832	0.340039
	ENSG00000071967	CYBRD1	-0.243961	0.114691	0.142817	0.177453	0.257934	0.292058
	ENSG00000071994	PDCD2	-0.180036	0.000189186	0.00032699	-0.346121	3.31212e-12	7.40361e-12
	ENSG00000072041	SLC6A15	0.904842	8.02517e-23	3.82918e-22	0.945168	2.79575e-22	8.58712e-22
	ENSG00000072042	RDH11	-0.581167	2.19335e-19	9.03262e-19	-0.412686	1.84613e-09	3.71112e-09
	ENSG00000072062	PRKACA	-0.731153	2.32511e-42	2.21389e-41	-1.1867	3.23623e-69	2.58207e-68
	ENSG00000072071	LPHN1	0.136994	0.201551	0.240308	0.280939	0.00692771	0.00940034
	ENSG00000072110	ACTN1	0.983028	1.31712e-61	2.19751e-60	1.52113	1.03021e-132	1.96727e-131
	ENSG00000072121	ZFYVE26	0.672056	1.25334e-34	9.09966e-34	1.71548	7.6099e-110	1.09092e-108
	ENSG00000072133	RPS6KA6	-0.311261	9.47837e-06	1.83136e-05	-0.372016	2.70993e-06	4.63921e-06
	ENSG00000072134	EPN2	-0.455019	1.08661e-07	2.40683e-07	-0.88313	2.55879e-18	7.00972e-18
	ENSG00000072135	PTPN18	-1.10622	1.91248e-40	1.69974e-39	-1.01183	1.70671e-31	6.62308e-31
	ENSG00000072163	LIMS2	1.65448	9.10674e-23	4.33694e-22	2.94225	8.44617e-64	6.18448e-63
	ENSG00000072195	SPEG	0.303935	0.000139867	0.000244775	0.185186	0.0139089	0.0183635
	ENSG00000072201	LNX1	0.483746	0.000285124	0.000484134	0.422077	0.0180681	0.0235613
	ENSG00000072210	ALDH3A2	-0.651429	9.84877e-31	6.27844e-30	-1.41968	1.11381e-87	1.16378e-86
	ENSG00000072274	TFRC	1.47745	1.20226e-46	1.29954e-45	2.27196	3.92496e-78	3.55889e-77
	ENSG00000072310	SREBF1	0.401493	8.22233e-12	2.35065e-11	-0.502192	2.54718e-15	6.37519e-15
	ENSG00000072364	AFF4	0.802084	9.60651e-29	5.70551e-28	1.27045	1.82232e-46	9.7521e-46
	ENSG00000072401	UBE2D1	1.8568	1.31216e-136	1.98136e-134	2.1648	4.4862e-214	2.12271e-212
	ENSG00000072415	MPP5	0.433757	5.25461e-27	2.94419e-26	1.42347	2.70674e-192	1.01431e-190
	ENSG00000072422	RHOBTB1	-1.67722	1.37892e-66	2.64614e-65	-2.21069	6.25904e-98	7.54111e-97
	ENSG00000072501	SMC1A	-0.207253	4.35874e-06	8.63259e-06	-0.0358621	0.419354	0.457611
	ENSG00000072506	HSD17B10	-0.177405	0.0408052	0.0546348	-0.136485	0.12371	0.147118
	ENSG00000072518	MARK2	-0.00880141	0.788765	0.818837	0.0344305	0.296162	0.33219
	ENSG00000072571	HMMR	-0.795995	1.35959e-05	2.60004e-05	-0.589049	0.00142969	0.00205466
	ENSG00000072609	CHFR	0.262129	7.48985e-20	3.15219e-19	0.0801002	0.0100536	0.0134564
	ENSG00000072657	TRHDE	0.307743	0.145733	0.178133	0.305504	0.1833	0.212606
	ENSG00000072682	P4HA2	0.512099	8.42744e-08	1.88342e-07	0.363542	7.80971e-05	0.000122633
	ENSG00000072694	FCGR2B	-0.0124248	0.925334	0.936957	0.276098	0.0333073	0.0421615
	ENSG00000072736	NFATC3	-1.90684	1.09402e-35	8.25154e-35	-2.40688	5.60959e-52	3.29437e-51
	ENSG00000072756	TRNT1	0.660776	7.0632e-27	3.93837e-26	0.819504	4.64827e-40	2.18763e-39
	ENSG00000072778	ACADVL	-0.0415625	0.488335	0.537089	-0.140287	0.0220424	0.0284609
	ENSG00000072786	STK10	0.553598	2.73489e-17	1.02723e-16	0.747493	1.3008e-25	4.35993e-25
	ENSG00000072803	FBXW11	0.166399	1.99291e-06	4.05555e-06	-0.192746	3.96522e-06	6.73191e-06
	ENSG00000072818	ACAP1	-0.380901	3.411e-06	6.81607e-06	-0.173315	0.0298854	0.0380425
	ENSG00000072832	CRMP1	0.349169	0.0207352	0.0289395	-0.533072	0.00239909	0.00338535
	ENSG00000072840	EVC	0.358559	0.00901815	0.0131499	-0.199289	0.15774	0.184636
	ENSG00000072849	DERL2	0.272931	0.000596143	0.000979851	0.60943	3.60062e-12	8.0353e-12
	ENSG00000072858	SIDT1	-1.1532	1.53842e-14	5.0723e-14	-1.19058	8.2828e-12	1.82607e-11
	ENSG00000072864	NDE1	-0.264507	0.00487327	0.00729891	0.558913	8.04505e-09	1.56811e-08
	ENSG00000072952	MRVI1	0.217858	0.0265542	0.0364852	0.106703	0.290988	0.326886
	ENSG00000072954	TMEM38A	-1.0413	1.10777e-12	3.31599e-12	-0.791718	6.1477e-07	1.0952e-06
	ENSG00000072958	AP1M1	-0.0736505	0.120251	0.149157	-0.119155	0.01937	0.0251843
	ENSG00000073008	PVR	1.0217	1.96649e-28	1.156e-27	2.10339	2.37124e-100	2.97191e-99
	ENSG00000073009	IKBKG	0.364445	0.000631463	0.00103517	0.175153	0.119461	0.142302
	ENSG00000073050	XRCC1	-0.897842	1.43066e-38	1.19214e-37	-1.95548	1.80542e-174	5.58896e-173
	ENSG00000073060	SCARB1	-0.871578	5.64341e-24	2.83099e-23	-0.808236	2.46583e-19	6.96696e-19
	ENSG00000073111	MCM2	-0.170691	0.0312556	0.0424996	-1.28516	5.55332e-49	3.12743e-48
	ENSG00000073146	MOV10L1	-0.26639	0.134552	0.165399	0.12324	0.52168	0.558071
	ENSG00000073150	PANX2	0.781515	8.20075e-20	3.4475e-19	0.368842	4.30587e-05	6.88129e-05
	ENSG00000073169	RP3-402G11.5	-0.00522477	0.958483	0.964808	0.345234	0.00156765	0.00224494
	ENSG00000073331	ALPK1	-0.884843	2.29118e-35	1.70827e-34	-0.297413	1.88247e-05	3.07682e-05
	ENSG00000073350	LLGL2	0.198512	3.96381e-06	7.87443e-06	0.214138	2.40429e-06	4.12732e-06
	ENSG00000073417	PDE8A	1.34357	1.68247e-84	5.65198e-83	1.85357	2.82834e-118	4.52292e-117
	ENSG00000073464	CLCN4	-1.63895	3.21571e-13	9.89536e-13	-1.89154	1.80834e-16	4.67791e-16
	ENSG00000073536	NLE1	0.806572	5.50327e-08	1.24536e-07	0.169083	0.193701	0.223818
	ENSG00000073578	SDHA	-0.216107	4.06521e-13	1.2425e-12	-0.490234	1.42682e-42	7.07588e-42
	ENSG00000073584	SMARCE1	-0.420677	1.1142e-26	6.17122e-26	-0.279964	5.52502e-13	1.27327e-12
	ENSG00000073605	GSDMB	-0.780416	7.28035e-22	3.33438e-21	-0.599997	1.45332e-12	3.29942e-12
	ENSG00000073614	KDM5A	0.105391	0.0315378	0.0428638	0.317256	5.02464e-10	1.0354e-09
	ENSG00000073670	ADAM11	0.16089	0.00486433	0.00728699	0.487354	2.65825e-14	6.4335e-14
	ENSG00000073711	PPP2R3A	0.900488	2.51932e-30	1.58108e-29	0.641479	8.52958e-16	2.16637e-15
	ENSG00000073712	FERMT2	2.52046	1.37672e-84	4.64572e-83	2.66238	5.68196e-95	6.61656e-94
	ENSG00000073734	ABCB11	0.348092	0.017296	0.0243647	-0.399595	0.0128916	0.017064
	ENSG00000073737	DHRS9	0.317241	0.090133	0.114448	0.291861	0.115936	0.138313
	ENSG00000073756	PTGS2	6.01973	2.60811e-170	1.02602e-167	7.51634	2.76452e-251	1.94977e-249
	ENSG00000073792	IGF2BP2	0.742587	2.43948e-22	1.13962e-21	0.599645	3.23586e-15	8.06913e-15
	ENSG00000073803	MAP3K13	0.121972	0.0120314	0.0172874	0.657821	1.05191e-24	3.44237e-24
	ENSG00000073849	ST6GAL1	-0.729822	5.64154e-36	4.29187e-35	-0.738236	9.65583e-33	3.86544e-32
	ENSG00000073861	TBX21	0.57447	1.27505e-05	2.44244e-05	0.601868	3.42831e-07	6.18039e-07
	ENSG00000073910	FRY	-0.393746	0.00187196	0.00292995	-0.782047	3.46753e-10	7.1929e-10
	ENSG00000073921	PICALM	0.473103	4.26637e-43	4.1904e-42	1.01723	8.42565e-147	1.92336e-145
	ENSG00000073969	NSF	-0.60996	1.70517e-36	1.32419e-35	-1.11108	1.393e-77	1.25244e-76
	ENSG00000074054	CLASP1	-0.270782	5.51173e-06	1.08357e-05	0.153255	0.0124487	0.0165041
	ENSG00000074071	MRPS34	-0.947954	4.78001e-15	1.61813e-14	-1.3137	7.44477e-28	2.6554e-27
	ENSG00000074181	NOTCH3	-0.0212468	0.824793	0.850333	-1.48263	9.92683e-56	6.28125e-55
	ENSG00000074201	CLNS1A	-0.359074	8.96299e-13	2.69322e-12	-0.192225	0.00033851	0.000508735
	ENSG00000074266	EED	0.151189	0.000235857	0.000403735	0.160094	0.000436287	0.000650385
	ENSG00000074319	TSG101	0.21848	8.38514e-07	1.74996e-06	0.243703	1.10359e-09	2.23832e-09
	ENSG00000074356	C17orf85	0.271405	6.95329e-16	2.45095e-15	0.164791	3.63794e-05	5.84447e-05
	ENSG00000074370	ATP2A3	-0.796806	2.57789e-17	9.69482e-17	-1.61664	3.13594e-51	1.8195e-50
	ENSG00000074410	CA12	0.296206	0.000108802	0.000192414	0.194881	0.00915479	0.012293
	ENSG00000074416	MGLL	0.489677	2.17194e-22	1.0175e-21	0.592805	1.65384e-25	5.52094e-25
	ENSG00000074582	BCS1L	-0.47002	2.03924e-17	7.69231e-17	-1.19086	9.2254e-70	7.42401e-69
	ENSG00000074603	DPP8	-0.399359	9.89876e-22	4.51011e-21	-0.492583	3.83288e-34	1.58138e-33
	ENSG00000074621	SLC24A1	0.240408	0.00026172	0.000445966	1.10773	3.28425e-35	1.38914e-34
	ENSG00000074657	ZNF532	-0.434448	5.5254e-07	1.1693e-06	-0.332425	0.000235651	0.000358403
	ENSG00000074660	SCARF1	0.530081	5.83444e-28	3.37404e-27	0.508732	1.7356e-21	5.21412e-21
	ENSG00000074695	LMAN1	0.216267	0.00234453	0.00363421	0.644612	2.21623e-19	6.26765e-19
	ENSG00000074696	PTPLAD1	-0.456732	3.27079e-14	1.06409e-13	-0.387708	9.93738e-09	1.92766e-08
	ENSG00000074706	IPCEF1	-0.434589	0.108078	0.135259	-0.218022	0.440859	0.479224
	ENSG00000074755	ZZEF1	-0.22837	2.73269e-13	8.45776e-13	-0.315337	6.39674e-23	1.99674e-22
	ENSG00000074800	ENO1	0.201084	0.00311101	0.00475138	-0.0783485	0.279051	0.314326
	ENSG00000074803	SLC12A1	0.381032	0.0413462	0.0553096	-0.067259	0.743619	0.769879
	ENSG00000074842	C19orf10	0.216205	0.0540433	0.0710361	0.462829	2.71116e-05	4.38905e-05
	ENSG00000074855	ANO8	-0.105884	0.376377	0.425152	0.107433	0.405735	0.443883
	ENSG00000074935	TUBE1	-0.102947	0.424154	0.473185	-0.0350803	0.779836	0.802651
	ENSG00000074964	ARHGEF10L	0.215989	4.62683e-05	8.45245e-05	0.659867	9.13219e-27	3.15418e-26
	ENSG00000074966	TXK	-0.488535	5.66293e-05	0.000102764	1.11313	5.75627e-18	1.5592e-17
	ENSG00000075035	WSCD2	-0.626286	1.09305e-06	2.2666e-06	-1.38744	3.28651e-24	1.06042e-23
	ENSG00000075043	KCNQ2	0.17178	0.0950201	0.120174	0.206135	0.0656923	0.0806893
	ENSG00000075073	TACR2	-0.697685	3.82211e-07	8.20223e-07	-0.587124	9.78049e-05	0.000152601
	ENSG00000075089	ACTR6	-0.34362	7.4847e-10	1.91067e-09	-0.362791	2.78653e-11	6.01562e-11
	ENSG00000075131	TIPIN	0.217497	0.00356386	0.00541204	0.0931052	0.243033	0.276442
	ENSG00000075142	SRI	0.16429	0.0148762	0.0211231	0.306455	1.67072e-05	2.7388e-05
	ENSG00000075151	EIF4G3	-0.347915	1.17782e-15	4.11097e-15	-0.457112	3.01459e-22	9.24976e-22
	ENSG00000075188	NUP37	-0.476913	2.51619e-08	5.82358e-08	-0.0274999	0.792616	0.814291
	ENSG00000075213	SEMA3A	1.08109	1.37001e-15	4.7673e-15	4.3269	2.28657e-162	6.09427e-161
	ENSG00000075218	GTSE1	-1.30946	1.88813e-10	4.9948e-10	-1.90604	2.67974e-20	7.77707e-20
	ENSG00000075223	SEMA3C	1.14684	1.09783e-35	8.27609e-35	1.55438	4.82771e-50	2.75722e-49
	ENSG00000075234	TTC38	-0.0643478	0.419678	0.468646	1.40935	2.63974e-77	2.36627e-76
	ENSG00000075239	ACAT1	-0.30023	4.72386e-05	8.62234e-05	-0.178226	0.0258612	0.0331399
	ENSG00000075240	GRAMD4	-1.21186	8.26936e-52	1.02844e-50	-1.61979	1.13381e-54	7.02561e-54
	ENSG00000075275	CELSR1	-0.254321	0.00382513	0.00579291	-0.910592	8.02609e-19	2.22935e-18
	ENSG00000075290	WNT8B	-0.77457	0.000113308	0.000200099	-0.948759	4.3557e-06	7.37558e-06
	ENSG00000075292	ZNF638	-0.101187	0.0320733	0.0435679	-0.0423927	0.394825	0.433057
	ENSG00000075303	SLC25A40	-0.818064	4.88594e-18	1.89566e-17	-0.331335	0.00425105	0.00587501
	ENSG00000075336	TIMM21	-0.49571	5.5383e-26	2.98673e-25	-1.48529	1.09259e-165	3.01967e-164
	ENSG00000075340	ADD2	1.30721	2.78878e-16	1.00167e-15	1.71914	1.08096e-25	3.63039e-25
	ENSG00000075388	FGF4	-0.0275312	0.688956	0.727037	-0.0410711	0.59946	0.633705
	ENSG00000075391	RASAL2	0.607174	1.26991e-06	2.62064e-06	0.796768	8.10231e-10	1.65635e-09
	ENSG00000075399	C16orf7	0.233307	0.000470167	0.000782163	1.65686	1.97326e-81	1.88525e-80
	ENSG00000075407	ZNF37A	-0.216706	0.000149846	0.000261351	-0.596926	1.23247e-18	3.40187e-18
	ENSG00000075413	MARK3	0.442826	1.61006e-15	5.59091e-15	0.44272	1.27574e-15	3.22209e-15
	ENSG00000075415	SLC25A3	0.129611	0.00516745	0.00772019	-0.0715912	0.132118	0.156519
	ENSG00000075420	FNDC3B	1.05698	4.24762e-52	5.31806e-51	1.73988	1.54277e-116	2.43071e-115
	ENSG00000075426	FOSL2	2.02564	2.24825e-108	1.40624e-106	3.01913	4.22341e-176	1.33506e-174
	ENSG00000075429	CACNG5	-0.815148	4.9496e-33	3.40818e-32	-0.781812	1.58971e-25	5.3104e-25
	ENSG00000075539	FRYL	-0.0032202	0.96725	0.972323	0.959736	2.97476e-21	8.8709e-21
	ENSG00000075568	TMEM131	0.0970623	0.0391336	0.0525189	0.701162	6.53652e-54	3.98915e-53
	ENSG00000075618	FSCN1	1.19993	1.81086e-23	8.91654e-23	2.38465	5.19118e-88	5.46995e-87
	ENSG00000075624	ACTB	0.0562869	0.356155	0.404725	0.424436	3.12971e-11	6.74189e-11
	ENSG00000075651	PLD1	0.693262	1.43453e-15	4.98834e-15	0.729268	5.59683e-14	1.33958e-13
	ENSG00000075673	ATP12A	-0.0426996	0.544906	0.591475	0.0318443	0.675556	0.705913
	ENSG00000075702	WDR62	-0.180007	0.00307032	0.00469162	0.680704	1.17851e-12	2.68697e-12
	ENSG00000075711	DLG1	-0.3571	1.05114e-13	3.3256e-13	-0.53565	1.6333e-30	6.19196e-30
	ENSG00000075785	RAB7A	0.720551	8.25365e-72	1.88085e-70	0.799818	4.79231e-79	4.41767e-78
	ENSG00000075790	BCAP29	0.0168955	0.474254	0.523104	0.116212	3.22821e-07	5.82667e-07
	ENSG00000075826	SEC31B	-0.669654	4.66689e-22	2.15458e-21	-0.729047	2.01206e-24	6.52304e-24
	ENSG00000075856	SART3	0.13251	0.00153778	0.00242928	0.0257071	0.596495	0.630839
	ENSG00000075884	ARHGAP15	-0.545471	2.31081e-08	5.36651e-08	-0.0275453	0.772026	0.795489
	ENSG00000075891	PAX2	-0.75709	0.000116569	0.000205663	-1.0619	3.19504e-07	5.7696e-07
	ENSG00000075914	EXOSC7	-0.380295	1.39643e-05	2.66845e-05	-1.29208	9.26909e-36	3.97566e-35
	ENSG00000075945	KIFAP3	-0.11684	0.00343767	0.00522784	0.760217	4.00142e-41	1.92935e-40
	ENSG00000075975	MKRN2	-0.27319	3.16649e-06	6.3487e-06	-0.681292	1.29536e-25	4.34264e-25
	ENSG00000076003	MCM6	-0.770523	2.51277e-17	9.45704e-17	-2.15018	2.07869e-63	1.51317e-62
	ENSG00000076043	REXO2	-0.111815	0.00631351	0.00935573	-0.337297	1.29338e-13	3.05266e-13
	ENSG00000076053	RBM7	0.705306	8.59912e-67	1.66298e-65	1.28135	2.68537e-176	8.5067e-175
	ENSG00000076067	RBMS2	-0.518897	6.40903e-11	1.74769e-10	0.961192	5.4202e-22	1.65191e-21
	ENSG00000076108	BAZ2A	0.290931	1.5763e-07	3.45413e-07	1.56956	5.79361e-147	1.32658e-145
	ENSG00000076201	PTPN23	0.333113	3.69357e-14	1.19799e-13	0.151664	0.00270527	0.00380305
	ENSG00000076242	MLH1	0.201177	7.703e-08	1.72564e-07	0.177955	1.25776e-06	2.19876e-06
	ENSG00000076248	UNG	-0.444707	2.78087e-06	5.59807e-06	-0.474369	8.92267e-06	1.48648e-05
	ENSG00000076258	FMO4	-0.268719	0.000773576	0.00125889	0.203412	0.0301462	0.0383484
	ENSG00000076321	KLHL20	-0.200568	0.0353686	0.0477405	-0.45708	1.44383e-05	2.37624e-05
	ENSG00000076344	RGS11	-0.0439467	0.697324	0.734571	-0.369165	0.00317855	0.00444456
	ENSG00000076351	SLC46A1	-1.81404	1.47335e-41	1.36632e-40	-2.19014	2.87134e-54	1.76241e-53
	ENSG00000076356	PLXNA2	-0.328393	0.000179596	0.000311206	-0.35504	3.51891e-05	5.65749e-05
	ENSG00000076382	SPAG5	1.27242	1.658e-09	4.14749e-09	1.7871	3.85818e-12	8.60237e-12
	ENSG00000076513	ANKRD13A	-0.52485	1.82098e-43	1.816e-42	-0.83135	1.88561e-64	1.39641e-63
	ENSG00000076554	TPD52	0.845987	9.17554e-18	3.51075e-17	1.1192	7.75237e-31	2.95698e-30
	ENSG00000076555	ACACB	-1.03241	5.97272e-48	6.6831e-47	-1.02997	3.03707e-37	1.34669e-36
	ENSG00000076604	TRAF4	1.92597	5.70495e-33	3.91567e-32	3.47596	8.22946e-77	7.32859e-76
	ENSG00000076641	PAG1	0.337561	0.0135091	0.0192883	0.433142	0.00206897	0.00293448
	ENSG00000076650	GPATCH1	-0.47118	4.87798e-34	3.46582e-33	-0.704406	6.57261e-30	2.44827e-29
	ENSG00000076662	ICAM3	0.189439	0.0251961	0.0347437	0.485705	7.53069e-09	1.47015e-08
	ENSG00000076685	NT5C2	0.401278	7.16175e-17	2.64673e-16	0.92294	9.54536e-80	8.89235e-79
	ENSG00000076706	MCAM	-0.588775	0.00039093	0.000655599	-0.0874575	0.636771	0.66944
	ENSG00000076716	GPC4	1.1339	3.70441e-09	9.0619e-09	-0.0136554	0.948288	0.954845
	ENSG00000076770	MBNL3	-0.760845	2.71708e-29	1.64444e-28	-0.423375	1.88881e-09	3.79386e-09
	ENSG00000076826	CAMSAP3	-0.00903548	0.886947	0.904493	0.158288	0.0161942	0.0212343
	ENSG00000076864	RAP1GAP	-0.0503114	0.752175	0.785049	0.0942644	0.598804	0.633146
	ENSG00000076924	XAB2	-0.0270694	0.780303	0.811235	-0.0353746	0.712063	0.740285
	ENSG00000076928	ARHGEF1	-0.364607	1.33614e-17	5.08502e-17	-0.373105	2.91609e-12	6.53497e-12
	ENSG00000076944	STXBP2	0.0231693	0.801406	0.829655	0.0260805	0.775979	0.799011
	ENSG00000076984	MAP2K7	-0.00532667	0.917056	0.930059	-0.590644	1.59311e-25	5.32056e-25
	ENSG00000077044	DGKD	-0.377438	3.51574e-15	1.19719e-14	-1.05383	1.41904e-57	9.28963e-57
	ENSG00000077063	CTTNBP2	-2.22265	5.2997e-67	1.03562e-65	-1.88213	5.86757e-48	3.23973e-47
	ENSG00000077080	ACTL6B	1.42226	2.99474e-21	1.33677e-20	0.519722	0.00137434	0.00197835
	ENSG00000077092	RARB	-0.225968	0.168923	0.204207	-0.123544	0.482159	0.51981
	ENSG00000077097	TOP2B	-0.283788	2.55171e-11	7.12335e-11	-0.254391	5.34799e-09	1.05284e-08
	ENSG00000077147	TM9SF3	0.0350448	0.24304	0.285382	-0.226672	1.61088e-10	3.38952e-10
	ENSG00000077150	NFKB2	1.61839	2.17051e-87	7.83744e-86	2.4079	1.61647e-225	8.51036e-224
	ENSG00000077152	UBE2T	0.0911734	0.415914	0.464929	-0.143319	0.196727	0.22714
	ENSG00000077157	PPP1R12B	-0.74627	3.02188e-20	1.29032e-19	-0.77599	6.86353e-25	2.25695e-24
	ENSG00000077232	DNAJC10	-0.323697	0.000428315	0.000715485	0.021072	0.826143	0.844892
	ENSG00000077235	GTF3C1	-0.35884	8.48948e-18	3.2537e-17	-0.397714	7.48459e-15	1.84669e-14
	ENSG00000077238	IL4R	1.10678	1.93921e-101	9.92781e-100	1.81129	1.77323e-267	1.39544e-265
	ENSG00000077254	USP33	-0.329844	1.19175e-10	3.20019e-10	0.601496	3.60473e-23	1.13302e-22
	ENSG00000077264	PAK3	-0.26784	0.103337	0.129781	-0.425423	0.0190375	0.0247672
	ENSG00000077279	DCX	-0.163888	0.0828401	0.105718	-0.111705	0.241997	0.275431
	ENSG00000077312	SNRPA	0.241427	0.00912006	0.0132907	0.381862	2.94121e-05	4.75015e-05
	ENSG00000077327	SPAG6	-0.234801	0.0345515	0.046688	-0.500293	1.00128e-05	1.66253e-05
	ENSG00000077348	EXOSC5	-0.221961	0.0353063	0.0476649	-0.0392926	0.714544	0.742347
	ENSG00000077380	DYNC1I2	0.175293	0.0511989	0.067511	0.246332	0.00648729	0.00882121
	ENSG00000077420	APBB1IP	-1.38277	1.47263e-79	4.21731e-78	-1.94299	3.08343e-110	4.44156e-109
	ENSG00000077454	LRCH4	-0.432289	1.37034e-13	4.30995e-13	-0.171545	0.00731782	0.00991711
	ENSG00000077458	FAM76B	0.315477	4.94747e-05	9.01837e-05	1.05933	9.58969e-49	5.3803e-48
	ENSG00000077463	SIRT6	-0.161724	0.123922	0.153417	-0.276424	0.0107144	0.0142999
	ENSG00000077498	TYR	0.940366	1.15811e-13	3.65861e-13	1.25248	9.88093e-22	2.98585e-21
	ENSG00000077514	POLD3	-0.76538	4.99552e-47	5.45493e-46	-0.805324	2.18456e-47	1.19166e-46
	ENSG00000077522	ACTN2	2.18289	2.78818e-53	3.6087e-52	2.79266	7.37976e-66	5.56441e-65
	ENSG00000077549	CAPZB	-0.227289	7.32745e-08	1.64398e-07	0.253803	9.30872e-10	1.89676e-09
	ENSG00000077585	GPR137B	0.695577	2.8122e-37	2.2469e-36	0.928804	1.95949e-57	1.27829e-56
	ENSG00000077616	NAALAD2	-0.231718	0.00127664	0.00203481	-0.325101	9.19266e-06	1.52976e-05
	ENSG00000077684	PHF17	-1.86617	2.92921e-65	5.44636e-64	-3.49131	1.19024e-244	8.05269e-243
	ENSG00000077713	SLC25A43	-0.0745774	0.515802	0.563815	-0.044881	0.713497	0.74154
	ENSG00000077721	UBE2A	0.345182	4.37683e-26	2.37063e-25	0.309337	1.15226e-21	3.4756e-21
	ENSG00000077782	FGFR1	1.16858	2.43932e-52	3.07207e-51	0.627104	4.82197e-14	1.15746e-13
	ENSG00000077809	GTF2I	-0.408971	6.17713e-10	1.58282e-09	-0.22971	0.000969284	0.00140925
	ENSG00000077935	SMC1B	-0.0895665	0.373286	0.421947	-0.769115	2.29079e-12	5.16153e-12
	ENSG00000077942	FBLN1	0.183386	0.00445134	0.00669717	0.600713	5.20378e-20	1.49514e-19
	ENSG00000077943	ITGA8	0.318676	0.00152263	0.00240637	0.100628	0.304062	0.340244
	ENSG00000077984	CST7	0.11739	0.445106	0.493942	0.226278	0.13662	0.161393
	ENSG00000078043	PIAS2	-0.249231	1.62243e-08	3.80928e-08	-0.969077	2.06265e-81	1.9694e-80
	ENSG00000078053	AMPH	-0.0248674	0.728616	0.763446	0.446197	1.69605e-08	3.25955e-08
	ENSG00000078061	ARAF	0.0886412	0.290352	0.336132	0.469999	2.25695e-08	4.31368e-08
	ENSG00000078070	MCCC1	-0.297135	4.25328e-06	8.43155e-06	-0.214173	0.00092029	0.00133932
	ENSG00000078081	LAMP3	1.62809	3.04292e-24	1.54566e-23	4.79806	1.39917e-157	3.57004e-156
	ENSG00000078114	NEBL	-0.322569	0.129372	0.159517	-1.01555	3.67935e-05	5.90845e-05
	ENSG00000078124	ACER3	0.0296477	0.627373	0.669661	-0.31569	4.1808e-06	7.08746e-06
	ENSG00000078140	UBE2K	1.82232	6.92018e-82	2.13299e-80	1.3225	1.81323e-21	5.44405e-21
	ENSG00000078142	PIK3C3	0.241845	1.25643e-07	2.7723e-07	0.156525	0.000907392	0.00132119
	ENSG00000078177	N4BP2	1.13197	1.05673e-21	4.80887e-21	1.64084	5.34521e-39	2.45234e-38
	ENSG00000078237	C12orf5	0.103265	0.145244	0.177651	-0.765744	5.14618e-20	1.47916e-19
	ENSG00000078246	TULP3	0.48455	9.15037e-14	2.90607e-13	0.241635	0.000749866	0.00109975
	ENSG00000078269	SYNJ2	0.173615	0.109775	0.137233	-0.433418	0.000104791	0.00016311
	ENSG00000078295	ADCY2	-0.134967	0.0414857	0.0554862	0.234521	0.000725185	0.00106429
	ENSG00000078304	PPP2R5C	-0.143484	0.00078632	0.0012781	-0.307107	1.91299e-13	4.48155e-13
	ENSG00000078328	RBFOX1	-0.0445935	0.740945	0.774573	-0.626669	3.25427e-05	5.2433e-05
	ENSG00000078369	GNB1	0.245726	4.49327e-26	2.43281e-25	0.406102	1.94286e-66	1.47911e-65
	ENSG00000078401	EDN1	3.50001	4.98086e-77	1.332e-75	4.06067	4.89544e-72	4.08008e-71
	ENSG00000078403	MLLT10	-0.197323	0.0262419	0.0360925	-0.929063	2.68026e-24	8.66678e-24
	ENSG00000078487	ZCWPW1	0.183248	0.000152491	0.000265749	0.407948	5.62167e-14	1.3451e-13
	ENSG00000078589	P2RY10	0.314727	0.085088	0.108494	1.09586	5.2426e-08	9.84272e-08
	ENSG00000078596	ITM2A	0.3093	0.00257406	0.00396819	1.10408	7.19957e-23	2.24501e-22
	ENSG00000078618	NRD1	0.079447	0.0238271	0.0329807	0.423395	1.33621e-44	6.92993e-44
	ENSG00000078668	VDAC3	-0.063663	0.0997861	0.125638	-0.433169	7.92964e-20	2.2657e-19
	ENSG00000078674	PCM1	-0.500716	2.56809e-12	7.53492e-12	-0.805924	5.03674e-26	1.70653e-25
	ENSG00000078687	TNRC6C	0.168746	0.00538061	0.00802822	0.0119879	0.84777	0.86442
	ENSG00000078699	CBFA2T2	0.13619	0.0515952	0.0679856	-0.048863	0.531181	0.567625
	ENSG00000078725	DBC1	0.187613	0.118764	0.14753	-0.303963	0.0178244	0.0232618
	ENSG00000078747	ITCH	0.149187	4.10049e-06	8.14054e-06	0.30537	1.01383e-14	2.48952e-14
	ENSG00000078795	PKD2L2	0.239138	0.154125	0.187471	-0.398878	0.0229756	0.0296352
	ENSG00000078804	TP53INP2	1.14542	7.53953e-59	1.15598e-57	2.18461	2.35677e-189	8.45045e-188
	ENSG00000078808	SDF4	0.481889	1.18596e-23	5.88414e-23	0.418194	7.90437e-20	2.25891e-19
	ENSG00000078814	MYH7B	-0.0278728	0.675347	0.714441	0.295894	1.25152e-05	2.06611e-05
	ENSG00000078898	BPIFB2	-0.065106	0.680313	0.718931	-0.0132971	0.932865	0.941111
	ENSG00000078900	TP73	-0.592234	4.10545e-10	1.06383e-09	-0.577391	2.02717e-08	3.88444e-08
	ENSG00000078902	TOLLIP	-0.0629231	0.182698	0.219635	-0.765308	2.0343e-40	9.67148e-40
	ENSG00000078967	UBE2D4	0.238525	4.0381e-07	8.65705e-07	-0.0364632	0.484002	0.521646
	ENSG00000079101	CLUL1	1.21194	2.22553e-33	1.55102e-32	1.44448	1.37648e-50	7.91581e-50
	ENSG00000079102	RUNX1T1	-1.967	5.95189e-14	1.9122e-13	-0.913411	0.000357513	0.000536377
	ENSG00000079134	THOC1	-0.178026	0.00356686	0.00541605	-1.01882	6.29134e-45	3.27992e-44
	ENSG00000079150	FKBP7	-0.0289814	0.758949	0.791346	0.131349	0.185667	0.215068
	ENSG00000079156	OSBPL6	0.381992	5.22157e-07	1.10798e-06	1.05147	2.07326e-32	8.21176e-32
	ENSG00000079215	SLC1A3	1.23213	7.48534e-35	5.48252e-34	2.2447	7.1491e-99	8.72599e-98
	ENSG00000079246	XRCC5	-0.213101	1.59791e-13	5.00569e-13	-0.182314	1.03985e-09	2.11305e-09
	ENSG00000079257	LXN	-0.144706	0.200935	0.239669	-0.722347	2.13988e-13	5.00164e-13
	ENSG00000079263	SP140	0.222777	0.0261626	0.0359902	2.64277	5.59862e-153	1.37456e-151
	ENSG00000079277	MKNK1	-0.814859	1.36876e-71	3.09555e-70	-1.23747	7.13341e-169	2.05905e-167
	ENSG00000079308	TNS1	-0.4686	2.80761e-05	5.22612e-05	0.295366	0.0103008	0.0137737
	ENSG00000079313	REXO1	0.543376	7.93889e-30	4.88993e-29	0.428366	4.51509e-19	1.26399e-18
	ENSG00000079332	SAR1A	0.569597	6.41566e-30	3.96805e-29	1.04642	5.70021e-63	4.12135e-62
	ENSG00000079335	CDC14A	0.869186	2.29563e-19	9.44341e-19	1.69082	4.08435e-79	3.77203e-78
	ENSG00000079337	RAPGEF3	-0.611711	2.54482e-05	4.75711e-05	0.965096	4.54083e-11	9.72858e-11
	ENSG00000079385	CEACAM1	-0.594835	3.93826e-06	7.82574e-06	-0.533839	2.58145e-05	4.18315e-05
	ENSG00000079387	SENP1	-0.0844159	0.1295	0.159661	0.265928	8.76964e-06	1.46164e-05
	ENSG00000079393	DUSP13	-0.25732	0.127264	0.157112	-0.172089	0.271964	0.30669
	ENSG00000079432	CIC	-0.0695904	0.408801	0.457903	-0.169717	0.0541812	0.0670627
	ENSG00000079435	LIPE	-0.214465	0.149413	0.182258	0.143705	0.305803	0.342089
	ENSG00000079459	FDFT1	-0.0297293	0.698224	0.735401	-0.515038	2.75695e-12	6.18761e-12
	ENSG00000079462	PAFAH1B3	-0.459411	0.00260902	0.00402085	-0.364062	0.0148178	0.01951
	ENSG00000079482	OPHN1	-1.55157	3.50024e-41	3.19055e-40	-1.10041	1.07514e-20	3.15576e-20
	ENSG00000079557	AFM	0.0630419	0.797757	0.82683	0.613513	0.0195694	0.0254348
	ENSG00000079616	KIF22	-0.929821	4.13803e-21	1.8345e-20	-1.32096	4.472e-43	2.24005e-42
	ENSG00000079689	SCGN	0.236307	0.0304003	0.0414082	0.997385	5.4153e-21	1.60145e-20
	ENSG00000079691	LRRC16A	-0.356801	2.06786e-10	5.45868e-10	-0.431857	9.94569e-10	2.02351e-09
	ENSG00000079739	PGM1	-0.410768	5.00677e-07	1.06331e-06	-0.186229	0.0233577	0.0300968
	ENSG00000079785	DDX1	-0.0787091	0.0515204	0.0678931	-0.182543	0.000133645	0.000206623
	ENSG00000079805	DNM2	0.116147	0.00497672	0.0074479	-0.13887	0.00644077	0.00875954
	ENSG00000079819	EPB41L2	-0.223561	0.0106282	0.0153746	0.089151	0.348513	0.38594
	ENSG00000079841	RIMS1	0.367026	6.45678e-18	2.4909e-17	0.740268	3.04725e-60	2.09579e-59
	ENSG00000079950	STX7	-0.0218379	0.624591	0.667024	-0.628138	2.80524e-39	1.29457e-38
	ENSG00000079974	RABL2B	-0.158202	0.0114888	0.0165522	-0.219811	0.00252533	0.00355744
	ENSG00000079999	KEAP1	0.44341	6.41888e-17	2.37573e-16	-0.122873	0.0246198	0.031625
	ENSG00000080007	DDX43	0.768677	1.91152e-07	4.1728e-07	0.760356	5.61561e-08	1.05258e-07
	ENSG00000080031	PTPRH	-0.625252	4.32868e-07	9.24684e-07	-1.36629	4.20564e-21	1.24841e-20
	ENSG00000080189	SLC35C2	0.0419924	0.518906	0.566627	0.563593	7.49357e-14	1.78159e-13
	ENSG00000080200	CRYBG3	0.582424	0.000650495	0.0010659	1.79134	3.33936e-20	9.66141e-20
	ENSG00000080224	EPHA6	0.0395783	0.417431	0.466521	0.632662	1.5631e-35	6.66422e-35
	ENSG00000080298	RFX3	-0.493814	9.99431e-07	2.07824e-06	0.631566	6.97355e-11	1.48531e-10
	ENSG00000080345	RIF1	0.95963	2.35883e-39	2.02076e-38	1.57792	4.30292e-83	4.21883e-82
	ENSG00000080371	RAB21	0.75578	2.43037e-87	8.75461e-86	1.34463	2.68298e-215	1.2899e-213
	ENSG00000080503	SMARCA2	-1.17522	1.53989e-81	4.65051e-80	-1.23701	7.25611e-61	5.0509e-60
	ENSG00000080511	RDH8	0.380841	6.50349e-09	1.56555e-08	0.355466	1.04772e-05	1.73732e-05
	ENSG00000080546	SESN1	-0.443938	1.68866e-09	4.22067e-09	-0.332106	1.30791e-05	2.15753e-05
	ENSG00000080561	MID2	0.0817688	0.210477	0.250013	-0.40953	9.76761e-08	1.81108e-07
	ENSG00000080572	CXorf41	0.200074	0.0992015	0.124986	0.0230656	0.856064	0.872104
	ENSG00000080573	COL5A3	1.42616	8.10632e-34	5.71341e-33	2.38064	7.38025e-80	6.88824e-79
	ENSG00000080603	SRCAP	0.00119143	0.977759	0.981106	-0.249224	3.51002e-07	6.32539e-07
	ENSG00000080608	KIAA0020	1.31461	2.75561e-42	2.6105e-41	0.549916	1.03772e-07	1.91982e-07
	ENSG00000080802	CNOT4	0.346269	2.81637e-21	1.2594e-20	0.644675	5.06423e-56	3.2194e-55
	ENSG00000080815	PSEN1	0.70222	1.11623e-74	2.76725e-73	1.1325	2.64621e-182	8.89125e-181
	ENSG00000080819	CPOX	-0.780711	1.71664e-38	1.42015e-37	-1.75979	1.25462e-93	1.42329e-92
	ENSG00000080822	CLDND1	1.09928	2.21064e-59	3.44957e-58	0.573321	3.75552e-16	9.63166e-16
	ENSG00000080823	MOK	0.120593	0.117453	0.146013	1.4047	1.55991e-39	7.25016e-39
	ENSG00000080824	HSP90AA1	0.351568	2.426e-11	6.78255e-11	0.280992	8.02402e-09	1.56442e-08
	ENSG00000080839	RBL1	0.395469	9.21394e-07	1.91944e-06	0.859079	1.45084e-27	5.14051e-27
	ENSG00000080845	DLGAP4	0.378168	4.90295e-12	1.41714e-11	0.76433	2.22589e-34	9.23461e-34
	ENSG00000080854	IGSF9B	0.383934	0.016188	0.0228735	0.533589	0.000649925	0.000956962
	ENSG00000080910	CFHR2	-0.247532	0.147624	0.180253	1.0616	8.76577e-09	1.70548e-08
	ENSG00000080986	NDC80	-1.27741	1.44703e-07	3.18113e-07	-1.88911	1.54587e-13	3.63369e-13
	ENSG00000081014	AP4E1	-0.907147	2.84391e-41	2.6034e-40	-1.16744	7.25033e-74	6.22313e-73
	ENSG00000081019	RSBN1	0.00727669	0.899005	0.914917	-0.0309549	0.652707	0.684285
	ENSG00000081026	MAGI3	0.228368	0.0255302	0.0351688	0.994874	1.54579e-20	4.50949e-20
	ENSG00000081041	CXCL2	4.43147	7.30309e-107	4.38449e-105	3.8108	1.35273e-49	7.69637e-49
	ENSG00000081052	COL4A4	-0.458197	1.91827e-12	5.66388e-12	-0.543776	2.76034e-13	6.42276e-13
	ENSG00000081059	TCF7	0.610872	7.37848e-08	1.65493e-07	1.74661	3.2899e-41	1.58833e-40
	ENSG00000081087	OSTM1	-0.00268081	0.951981	0.959232	0.0635884	0.19968	0.230354
	ENSG00000081138	CDH7	0.199307	0.0228868	0.0317438	-0.0505015	0.60965	0.643249
	ENSG00000081148	IMPG2	0.403719	0.00754341	0.0110925	0.885557	4.2935e-07	7.70851e-07
	ENSG00000081154	PCNP	0.057528	0.130937	0.16134	0.0703318	0.0798043	0.0970977
	ENSG00000081177	EXD2	-0.779804	2.04801e-25	1.08298e-24	-1.0674	1.41559e-35	6.04222e-35
	ENSG00000081181	ARG2	-0.276538	0.000395243	0.000662534	-0.239305	0.00224783	0.00317911
	ENSG00000081189	MEF2C	-1.96218	7.26505e-112	5.05141e-110	-1.47925	6.89109e-62	4.88783e-61
	ENSG00000081237	PTPRC	-0.491857	4.6495e-07	9.90671e-07	-0.535544	3.55716e-08	6.74016e-08
	ENSG00000081248	CACNA1S	-0.288767	0.0573653	0.0751186	-0.209857	0.194303	0.224463
	ENSG00000081277	PKP1	1.06933	5.25978e-10	1.3538e-09	1.70448	5.9103e-22	1.79908e-21
	ENSG00000081307	UBA5	-0.667351	3.9524e-35	2.92497e-34	-0.658868	2.30216e-34	9.5431e-34
	ENSG00000081320	STK17B	-0.138052	0.0662738	0.0859261	-0.20031	0.0181362	0.0236419
	ENSG00000081377	CDC14B	-0.328927	0.000259461	0.000442317	0.0107301	0.909824	0.919976
	ENSG00000081386	ZNF510	-0.793478	9.90922e-31	6.31428e-30	-0.37333	1.26502e-07	2.33083e-07
	ENSG00000081479	LRP2	0.805898	1.43596e-06	2.95189e-06	0.792829	1.06968e-05	1.77276e-05
	ENSG00000081665	ZNF506	0.136324	0.0477875	0.063247	0.185951	0.012666	0.0167773
	ENSG00000081692	JMJD4	0.141275	0.154017	0.187355	-0.155553	0.147051	0.17299
	ENSG00000081721	DUSP12	-0.309595	7.71765e-09	1.84919e-08	-0.670139	8.18495e-31	3.12038e-30
	ENSG00000081760	AACS	0.322017	9.21846e-12	2.6309e-11	0.462386	5.26324e-21	1.55741e-20
	ENSG00000081791	KIAA0141	-0.448818	2.35837e-16	8.49525e-16	-1.0717	5.29631e-94	6.05895e-93
	ENSG00000081870	HSPB11	-0.338889	1.03196e-07	2.28985e-07	-0.108904	0.0905743	0.109533
	ENSG00000081913	PHLPP1	0.0759783	0.130348	0.160641	0.212173	0.00107444	0.00155669
	ENSG00000081923	ATP8B1	-0.185679	0.00192959	0.00301636	-0.118119	0.0724094	0.0884965
	ENSG00000081985	IL12RB2	2.95711	9.04742e-50	1.05747e-48	6.07093	2.0054e-169	5.81098e-168
	ENSG00000082014	SMARCD3	-0.265446	0.00390683	0.00590947	-0.0106267	0.906478	0.917027
	ENSG00000082068	WDR70	-0.693508	3.90813e-22	1.80875e-21	-0.647801	1.37879e-18	3.80011e-18
	ENSG00000082074	FYB	-0.388443	9.1907e-08	2.04787e-07	-0.196787	0.00484952	0.00667311
	ENSG00000082146	STRADB	-0.304782	1.49424e-13	4.6878e-13	-0.328638	3.83032e-15	9.52611e-15
	ENSG00000082153	BZW1	0.846822	1.72343e-68	3.5487e-67	0.888338	4.55376e-67	3.49886e-66
	ENSG00000082212	ME2	-0.546692	8.39483e-12	2.39905e-11	-0.890577	1.34954e-24	4.39615e-24
	ENSG00000082213	C5orf22	-0.406466	1.70883e-11	4.8235e-11	0.116197	0.0775821	0.0945555
	ENSG00000082258	CCNT2	0.744494	1.73394e-37	1.38911e-36	0.900316	4.76412e-53	2.8538e-52
	ENSG00000082269	FAM135A	-0.903522	8.62663e-32	5.68855e-31	-0.53679	1.6082e-11	3.50471e-11
	ENSG00000082293	COL19A1	0.00830967	0.935183	0.945364	0.238298	0.0153978	0.020238
	ENSG00000082397	EPB41L3	0.102115	0.116173	0.144542	0.434471	2.65394e-11	5.73435e-11
	ENSG00000082438	COBLL1	0.461415	0.00469573	0.00704925	1.53699	1.47459e-19	4.18211e-19
	ENSG00000082458	DLG3	3.14858	3.77514e-52	4.73047e-51	3.86283	1.50081e-59	1.02047e-58
	ENSG00000082482	KCNK2	0.602744	0.00202801	0.00316327	-0.0554698	0.772385	0.795804
	ENSG00000082512	TRAF5	0.187247	0.0416325	0.0556677	-0.849226	1.01658e-20	2.98565e-20
	ENSG00000082515	MRPL22	0.253419	0.00119036	0.00190278	-0.334641	5.23877e-06	8.83091e-06
	ENSG00000082516	GEMIN5	0.617973	2.03657e-15	7.03273e-15	-0.170337	0.0302261	0.0384434
	ENSG00000082641	NFE2L1	-0.210229	7.84197e-05	0.000140833	-0.569467	7.24711e-21	2.13641e-20
	ENSG00000082684	SEMA5B	0.380969	0.000446026	0.000743411	0.0804358	0.502202	0.539125
	ENSG00000082701	GSK3B	0.19335	0.000133728	0.000234608	0.0294437	0.587855	0.622449
	ENSG00000082781	ITGB5	-1.00796	1.51968e-34	1.10013e-33	-1.01474	1.85993e-34	7.73349e-34
	ENSG00000082805	ERC1	-0.200893	0.0102939	0.0149098	-0.442401	3.26701e-09	6.49147e-09
	ENSG00000082898	XPO1	-0.57637	2.23076e-36	1.72517e-35	-0.671251	3.19482e-44	1.64493e-43
	ENSG00000082996	RNF13	0.508502	1.13016e-20	4.91412e-20	0.603009	4.21703e-31	1.61882e-30
	ENSG00000083067	TRPM3	0.583989	1.33701e-05	2.5585e-05	0.699129	4.27155e-07	7.67093e-07
	ENSG00000083093	PALB2	0.229833	6.40331e-07	1.34935e-06	-0.2759	3.82234e-08	7.22889e-08
	ENSG00000083097	DOPEY1	-0.834215	8.20865e-13	2.47252e-12	-0.777095	1.09071e-09	2.21339e-09
	ENSG00000083099	LYRM2	0.0390858	0.495343	0.543916	-0.494439	1.27467e-15	3.21994e-15
	ENSG00000083123	BCKDHB	-0.42071	4.37048e-07	9.33347e-07	-0.31154	0.00177257	0.00252679
	ENSG00000083168	KAT6A	0.844874	1.22353e-24	6.30273e-24	1.07823	6.29281e-30	2.34639e-29
	ENSG00000083223	ZCCHC6	-0.446526	3.99197e-14	1.29253e-13	-0.244462	4.23739e-05	6.7762e-05
	ENSG00000083290	ULK2	-0.141458	0.0288344	0.0394117	0.443256	8.53751e-14	2.0272e-13
	ENSG00000083312	TNPO1	0.582945	8.35896e-28	4.80978e-27	1.04018	2.99889e-62	2.1444e-61
	ENSG00000083444	PLOD1	-0.624639	1.54559e-14	5.09483e-14	-0.532196	1.35938e-10	2.86477e-10
	ENSG00000083457	ITGAE	-0.549115	6.48985e-07	1.36682e-06	-0.3326	0.00298737	0.00418428
	ENSG00000083520	DIS3	0.502033	2.07766e-35	1.55139e-34	0.518819	1.14557e-29	4.23975e-29
	ENSG00000083535	PIBF1	-0.263772	9.01488e-05	0.000161041	0.0390572	0.563616	0.599586
	ENSG00000083544	TDRD3	0.0933329	0.738955	0.772769	-0.297784	0.284679	0.320159
	ENSG00000083635	NUFIP1	0.173967	0.0145813	0.0207222	-0.50033	1.95621e-09	3.92765e-09
	ENSG00000083642	PDS5B	-0.456046	6.99921e-10	1.78948e-09	-0.224218	0.00646041	0.00878546
	ENSG00000083720	OXCT1	-0.17171	0.152084	0.185169	0.32595	0.00531706	0.0072883
	ENSG00000083750	RRAGB	-0.115349	0.00988703	0.0143496	-0.412176	2.641e-15	6.60337e-15
	ENSG00000083799	CYLD	0.987436	1.68766e-77	4.57044e-76	2.03188	0	0
	ENSG00000083807	SLC27A5	-0.263557	0.0458416	0.0608699	-0.0689284	0.588111	0.622677
	ENSG00000083812	ZNF324	-0.0116439	0.825561	0.850929	-0.296003	4.18736e-09	8.27728e-09
	ENSG00000083814	ZNF671	-0.54441	5.67447e-27	3.17588e-26	-0.473145	1.25734e-12	2.86277e-12
	ENSG00000083817	ZNF416	-0.0393332	0.482655	0.531546	-0.207012	0.000761027	0.00111536
	ENSG00000083828	ZNF586	0.173906	0.000749821	0.00122187	-0.0167143	0.762824	0.787689
	ENSG00000083838	ZNF446	-0.283776	8.63018e-05	0.000154469	-0.075702	0.439435	0.477884
	ENSG00000083842	ZNF8	-0.0407629	0.499411	0.54794	-0.202115	0.00476681	0.00656232
	ENSG00000083844	ZNF264	-0.0686474	0.125738	0.15546	0.300868	1.03996e-06	1.82742e-06
	ENSG00000083845	RPS5	0.174298	0.151136	0.184135	0.213137	0.0741963	0.0905692
	ENSG00000083896	YTHDC1	0.386849	0.00294505	0.0045091	0.808963	1.05314e-08	2.0405e-08
	ENSG00000083937	CHMP2B	0.41784	1.6377e-26	9.02062e-26	0.226213	6.94644e-08	1.29651e-07
	ENSG00000084070	SMAP2	0.765238	1.46391e-28	8.643e-28	2.31997	8.33417e-197	3.23669e-195
	ENSG00000084072	PPIE	-0.374181	8.57727e-06	1.66284e-05	-0.474044	1.96601e-08	3.77063e-08
	ENSG00000084073	ZMPSTE24	-0.131801	0.000340496	0.000574047	-0.179073	1.05097e-07	1.94312e-07
	ENSG00000084090	STARD7	-0.304378	2.40044e-08	5.5669e-08	-0.621088	9.75497e-28	3.47194e-27
	ENSG00000084092	NOA1	-0.344422	1.81894e-13	5.67433e-13	-0.358897	5.53128e-09	1.08778e-08
	ENSG00000084093	REST	-0.0471683	0.414831	0.463788	0.0768354	0.330136	0.367085
	ENSG00000084110	HAL	-0.194314	0.187822	0.225342	0.0522567	0.755063	0.780592
	ENSG00000084112	SSH1	-0.345345	5.25459e-06	1.03397e-05	-1.14422	1.18633e-37	5.29493e-37
	ENSG00000084207	GSTP1	-0.0741019	0.528204	0.575309	0.0387017	0.7423	0.76862
	ENSG00000084234	APLP2	0.260803	3.48874e-06	6.9649e-06	0.506161	2.47114e-18	6.77209e-18
	ENSG00000084444	KIAA1467	-0.143968	0.0779214	0.0997642	-0.933768	3.42732e-21	1.02042e-20
	ENSG00000084453	SLCO1A2	1.16873	3.58176e-54	4.76792e-53	1.12889	9.52978e-33	3.81599e-32
	ENSG00000084463	WBP11	0.0985243	0.0142452	0.0202656	0.162251	3.17375e-05	5.11853e-05
	ENSG00000084623	EIF3I	0.488328	5.54388e-10	1.42447e-09	0.612173	6.89814e-16	1.75709e-15
	ENSG00000084636	COL16A1	-0.0316069	0.31576	0.362821	0.0172494	0.658061	0.689173
	ENSG00000084652	TXLNA	0.31833	3.228e-13	9.92909e-13	0.347928	2.80422e-16	7.22161e-16
	ENSG00000084676	NCOA1	0.699393	2.12169e-26	1.16265e-25	0.717021	2.33605e-27	8.21464e-27
	ENSG00000084693	AGBL5	-0.349657	4.28201e-09	1.04203e-08	-0.276877	1.46904e-06	2.55647e-06
	ENSG00000084710	EFR3B	-0.240195	0.00940932	0.0136882	-0.589938	3.32044e-08	6.3036e-08
	ENSG00000084731	KIF3C	-0.26699	0.00443416	0.00667267	-0.455081	6.60177e-06	1.10698e-05
	ENSG00000084733	RAB10	0.422703	1.36127e-22	6.43773e-22	0.294584	4.40242e-12	9.79685e-12
	ENSG00000084734	GCKR	6.77108	1.17712e-160	3.59118e-158	7.38769	2.22184e-205	9.38443e-204
	ENSG00000084754	HADHA	-0.223112	0.000520099	0.000860157	-0.17515	0.00752633	0.0101887
	ENSG00000084764	MAPRE3	0.0190461	0.738844	0.772769	-0.176646	0.0110756	0.0147649
	ENSG00000084774	CAD	-0.500516	1.91921e-17	7.25051e-17	-0.524037	1.28936e-17	3.45246e-17
	ENSG00000085063	CD59	0.773094	1.09127e-16	4.0033e-16	1.06867	9.56151e-30	3.54748e-29
	ENSG00000085117	CD82	0.684144	1.89291e-26	1.03957e-25	1.0452	1.10175e-65	8.27806e-65
	ENSG00000085185	BCORL1	0.0227289	0.766489	0.79849	0.28651	0.000791652	0.00115831
	ENSG00000085224	ATRX	-0.304769	4.53715e-06	8.97762e-06	-0.439148	1.45512e-09	2.93774e-09
	ENSG00000085231	TAF9	0.719215	5.76849e-50	6.79536e-49	0.723966	1.73498e-41	8.43898e-41
	ENSG00000085265	FCN1	0.151455	0.26899	0.313196	0.564203	1.94239e-05	3.16921e-05
	ENSG00000085274	MYNN	-0.0229012	0.583614	0.628291	-0.0419626	0.372043	0.410114
	ENSG00000085276	MECOM	0.521484	0.0280655	0.0384495	2.12084	5.50436e-16	1.40566e-15
	ENSG00000085377	PREP	-0.0343267	0.408402	0.45749	-0.367216	4.29061e-17	1.13125e-16
	ENSG00000085382	HACE1	-0.369201	0.000253845	0.000433089	-0.256969	0.010047	0.0134487
	ENSG00000085415	SEH1L	0.828603	2.46505e-54	3.29313e-53	0.310857	5.23433e-08	9.82841e-08
	ENSG00000085433	WDR47	0.322945	0.000784955	0.00127616	0.0192234	0.849954	0.866529
	ENSG00000085449	WDFY1	0.939711	6.73489e-75	1.678e-73	1.09821	4.77989e-82	4.6109e-81
	ENSG00000085465	OVGP1	-0.725824	4.3835e-07	9.35859e-07	-1.07966	1.2877e-14	3.14964e-14
	ENSG00000085491	SLC25A24	-0.227253	0.000267794	0.000455848	0.0730143	0.270382	0.305044
	ENSG00000085511	MAP3K4	0.811532	8.45154e-21	3.69637e-20	0.535513	7.02681e-06	1.17654e-05
	ENSG00000085514	PILRA	0.472408	1.90421e-14	6.24942e-14	0.869076	2.25381e-40	1.06947e-39
	ENSG00000085552	IGSF9	-0.597539	0.000225959	0.000387903	-0.662044	4.05412e-05	6.49146e-05
	ENSG00000085563	ABCB1	-0.360205	0.000130473	0.000229248	-0.352989	0.000368252	0.000552046
	ENSG00000085644	ZNF213	-0.607494	5.1792e-18	2.00788e-17	-0.096807	0.219927	0.251991
	ENSG00000085662	AKR1B1	0.402702	0.000186992	0.000323423	0.33354	0.00312141	0.00436792
	ENSG00000085719	CPNE3	-0.394155	8.14609e-15	2.71882e-14	-0.0196466	0.693842	0.723101
	ENSG00000085721	RRN3	0.983465	5.08502e-61	8.38103e-60	0.777795	3.36621e-30	1.26303e-29
	ENSG00000085733	CTTN	0.00618719	0.951507	0.958948	0.258265	0.0108665	0.014499
	ENSG00000085760	MTIF2	-0.473937	3.21995e-18	1.25876e-17	-0.628885	3.69295e-31	1.41946e-30
	ENSG00000085788	DDHD2	-0.325516	3.88161e-06	7.71831e-06	-0.523276	4.69056e-14	1.12664e-13
	ENSG00000085831	TTC39A	0.810327	1.84102e-18	7.26924e-18	2.91761	7.96062e-156	2.00046e-154
	ENSG00000085832	EPS15	-0.279519	7.75468e-08	1.73644e-07	0.1756	0.00272063	0.00382356
	ENSG00000085840	ORC1	-0.696353	1.20781e-12	3.6039e-12	-0.570035	6.6551e-09	1.30279e-08
	ENSG00000085871	MGST2	0.152882	0.00878358	0.0128166	0.563973	3.64548e-20	1.05328e-19
	ENSG00000085872	CHERP	0.502678	1.48786e-28	8.77396e-28	0.295473	2.42171e-10	5.06284e-10
	ENSG00000085978	ATG16L1	-0.291496	4.89116e-12	1.414e-11	-0.269547	1.01578e-06	1.7866e-06
	ENSG00000085982	USP40	-0.255915	5.42356e-09	1.31277e-08	-0.234665	9.79128e-08	1.81502e-07
	ENSG00000085998	POMGNT1	0.346261	1.40165e-05	2.67807e-05	0.685504	1.67439e-18	4.60719e-18
	ENSG00000085999	RAD54L	-0.0964291	0.515571	0.563644	-0.0662947	0.676959	0.707181
	ENSG00000086015	MAST2	0.196229	2.05672e-05	3.8762e-05	-0.46117	3.59088e-14	8.65981e-14
	ENSG00000086061	DNAJA1	1.12583	1.10663e-89	4.19875e-88	2.15169	0	0
	ENSG00000086062	B4GALT1	0.992966	3.22335e-61	5.33619e-60	1.20762	1.49434e-89	1.60628e-88
	ENSG00000086065	CHMP5	1.05726	1.16883e-21	5.31087e-21	0.846447	8.95796e-21	2.63608e-20
	ENSG00000086102	NFX1	0.139556	0.00168518	0.00265009	0.447128	6.61149e-19	1.84328e-18
	ENSG00000086189	DIMT1	0.222233	5.32694e-05	9.68647e-05	-0.626502	6.67301e-27	2.31604e-26
	ENSG00000086200	IPO11	-0.300867	1.25758e-08	2.97555e-08	-0.724254	1.27276e-34	5.3083e-34
	ENSG00000086205	FOLH1	1.02864	9.66005e-08	2.14957e-07	1.40118	1.00246e-11	2.20327e-11
	ENSG00000086232	EIF2AK1	-0.356797	2.80319e-34	2.00983e-33	-0.471962	1.00976e-43	5.14237e-43
	ENSG00000086288	TXNDC3	-0.172285	0.16811	0.203307	0.609459	4.38209e-07	7.86377e-07
	ENSG00000086289	EPDR1	-0.535138	0.000768351	0.00125066	-0.58016	0.000333969	0.000502162
	ENSG00000086300	SNX10	2.01002	2.35549e-98	1.13223e-96	2.77906	5.00242e-181	1.65478e-179
	ENSG00000086475	SEPHS1	-0.351233	4.21548e-21	1.86773e-20	-0.574602	2.82547e-42	1.39244e-41
	ENSG00000086504	MRPL28	-0.278154	0.0272543	0.0373956	-0.125043	0.327228	0.364068
	ENSG00000086544	ITPKC	0.881408	9.80237e-39	8.23234e-38	3.16641	9.32665e-146	2.10335e-144
	ENSG00000086548	CEACAM6	-1.2455	9.52743e-15	3.16853e-14	-2.22671	8.29505e-34	3.38894e-33
	ENSG00000086570	FAT2	-0.673739	1.44093e-13	4.5253e-13	-0.455816	9.61678e-07	1.69464e-06
	ENSG00000086589	RBM22	0.454015	8.55162e-21	3.73905e-20	0.923665	6.74307e-76	5.93073e-75
	ENSG00000086598	TMED2	0.242132	2.89649e-13	8.93697e-13	0.535102	3.82794e-46	2.0383e-45
	ENSG00000086619	ERO1LB	0.38483	9.91523e-11	2.67454e-10	0.940263	1.20407e-53	7.29467e-53
	ENSG00000086666	ZFAND6	0.474667	8.36606e-32	5.5216e-31	0.0573898	0.184233	0.213606
	ENSG00000086696	HSD17B2	-0.207909	0.119451	0.148262	-0.306385	0.0217024	0.0280462
	ENSG00000086712	TXLNG	0.501525	7.66594e-11	2.08285e-10	-0.148708	0.0792663	0.0964981
	ENSG00000086730	LAT2	0.0604018	0.443471	0.492383	0.0596925	0.439972	0.478425
	ENSG00000086758	HUWE1	0.691059	2.98573e-37	2.37919e-36	1.77436	1.81485e-168	5.19841e-167
	ENSG00000086827	ZW10	0.0199595	0.528152	0.575294	-0.198608	3.78752e-06	6.44047e-06
	ENSG00000086848	ALG9	-0.739072	1.91978e-38	1.58382e-37	-1.2491	4.89057e-67	3.75572e-66
	ENSG00000086967	MYBPC2	1.0397	2.89089e-05	5.37712e-05	-0.711183	0.00695587	0.0094369
	ENSG00000087008	ACOX3	1.92499	4.0306e-90	1.55693e-88	3.74321	0	0
	ENSG00000087053	MTMR2	0.152361	6.56096e-05	0.000118483	-0.0824312	0.054952	0.0679943
	ENSG00000087074	PPP1R15A	2.25512	6.85922e-104	3.82606e-102	2.02057	1.71582e-55	1.0793e-54
	ENSG00000087076	HSD17B14	-0.128769	0.212552	0.252309	-0.125604	0.238787	0.272109
	ENSG00000087077	TRIP6	-0.146976	0.0245591	0.0339123	-0.254842	0.000157847	0.000243136
	ENSG00000087085	ACHE	1.02025	4.22077e-36	3.22743e-35	1.39046	1.36898e-56	8.79253e-56
	ENSG00000087086	FTL	0.209908	0.00142503	0.00226075	0.0660205	0.323505	0.360194
	ENSG00000087087	SRRT	0.141014	0.00273527	0.00420415	-0.192499	9.90328e-05	0.000154437
	ENSG00000087088	BAX	-0.0449084	0.481445	0.530351	-0.593412	5.96942e-15	1.47553e-14
	ENSG00000087095	NLK	-0.562005	4.61459e-22	2.13109e-21	-0.559386	8.72154e-20	2.49006e-19
	ENSG00000087111	PIGS	-0.676398	1.9164e-49	2.22424e-48	-0.573601	6.16232e-31	2.35409e-30
	ENSG00000087116	ADAMTS2	0.0141109	0.939946	0.94896	0.387862	0.0581217	0.071744
	ENSG00000087152	ATXN7L3	-0.115269	0.0471956	0.062519	-0.412112	8.39527e-11	1.78304e-10
	ENSG00000087157	PGS1	1.19087	1.11524e-51	1.37915e-50	2.00116	1.64499e-176	5.24433e-175
	ENSG00000087191	PSMC5	-0.0787067	0.253124	0.296246	-0.509511	7.68317e-13	1.76276e-12
	ENSG00000087206	UIMC1	0.527339	5.86288e-26	3.15608e-25	0.247963	4.65881e-06	7.88082e-06
	ENSG00000087237	CETP	1.68849	9.0085e-20	3.78069e-19	2.90547	8.00209e-82	7.69435e-81
	ENSG00000087245	MMP2	-0.525126	3.29709e-13	1.01395e-12	-0.39977	1.06995e-07	1.97773e-07
	ENSG00000087250	MT3	-0.333524	0.0457751	0.060799	-0.914292	8.0983e-06	1.35186e-05
	ENSG00000087253	LPCAT2	-1.1724	2.14186e-26	1.17327e-25	-1.03145	7.56841e-19	2.10457e-18
	ENSG00000087258	GNAO1	-0.0180747	0.834826	0.859195	0.161145	0.0840939	0.102076
	ENSG00000087263	OGFOD1	0.238936	2.54707e-09	6.29878e-09	-0.153482	0.0107052	0.0142888
	ENSG00000087266	SH3BP2	0.329323	5.78015e-08	1.30663e-07	-0.135229	0.0214559	0.0277372
	ENSG00000087269	NOP14	0.611129	8.79025e-26	4.7065e-25	0.039189	0.577144	0.612366
	ENSG00000087274	ADD1	-0.103845	0.0945039	0.119574	-0.0207347	0.738466	0.76502
	ENSG00000087299	L2HGDH	0.855233	9.2929e-19	3.72538e-18	3.58082	2.72347e-238	1.68968e-236
	ENSG00000087301	TXNDC16	0.159525	0.0308144	0.0419377	0.45867	9.15526e-10	1.86625e-09
	ENSG00000087302	C14orf166	-0.114297	0.0970469	0.122552	-0.17326	0.00988185	0.0132384
	ENSG00000087303	NID2	-0.0614067	0.571403	0.617101	-0.285243	0.0125315	0.0166109
	ENSG00000087338	GMCL1	-1.1017	8.53924e-54	1.13067e-52	-1.30575	2.38439e-54	1.46835e-53
	ENSG00000087365	SF3B2	0.0646215	0.0451028	0.0599592	0.191725	9.53494e-08	1.76925e-07
	ENSG00000087448	KLHDC5	-0.505467	3.71034e-17	1.38734e-16	-0.309005	1.03763e-06	1.82353e-06
	ENSG00000087460	GNAS	-0.0791866	0.0207386	0.0289415	0.0347356	0.338582	0.375861
	ENSG00000087470	DNM1L	0.343308	2.65523e-17	9.98067e-17	0.432366	1.48313e-26	5.09203e-26
	ENSG00000087502	ERGIC2	-0.241956	4.56778e-13	1.39298e-12	-0.356435	1.51594e-17	4.04983e-17
	ENSG00000087510	TFAP2C	0.921983	3.77892e-13	1.15713e-12	-0.615307	1.12259e-06	1.96752e-06
	ENSG00000087586	AURKA	-1.45924	6.3774e-48	7.13057e-47	-2.61027	1.46218e-146	3.32762e-145
	ENSG00000087589	CASS4	-0.76039	2.82733e-05	5.26218e-05	-2.10907	2.92189e-32	1.15242e-31
	ENSG00000087842	PIR	0.193843	0.0163481	0.0230903	-0.0187456	0.829464	0.847836
	ENSG00000087884	C11orf67	-0.118739	0.189632	0.227312	0.177021	0.0437988	0.0547142
	ENSG00000087903	RFX2	-0.70146	8.69666e-48	9.70196e-47	-2.01562	2.63705e-174	8.113e-173
	ENSG00000087995	METTL2A	0.116947	0.00820816	0.0120145	0.167011	0.000628195	0.000925578
	ENSG00000088002	SULT2B1	-0.0124152	0.911441	0.925118	0.0406922	0.737903	0.764491
	ENSG00000088035	ALG6	-0.639809	8.86981e-24	4.40954e-23	-0.434489	5.31156e-11	1.1352e-10
	ENSG00000088038	CNOT3	0.380475	1.5567e-11	4.40241e-11	0.483287	3.48713e-12	7.78668e-12
	ENSG00000088179	PTPN4	0.020825	0.773759	0.805272	0.267811	0.004717	0.00649674
	ENSG00000088205	DDX18	0.0599133	0.221635	0.262288	-0.357758	1.09569e-09	2.22291e-09
	ENSG00000088247	KHSRP	0.0895062	0.0361046	0.048668	-0.389561	3.68887e-21	1.09719e-20
	ENSG00000088256	GNA11	0.217131	0.0793621	0.101504	0.0485722	0.692028	0.721411
	ENSG00000088298	EDEM2	-0.361713	4.23465e-14	1.36962e-13	-0.256537	4.36002e-08	8.21666e-08
	ENSG00000088305	DNMT3B	0.641307	1.75791e-08	4.1138e-08	1.40547	2.71194e-32	1.07131e-31
	ENSG00000088320	REM1	2.2566	7.01313e-24	3.49931e-23	2.95839	2.9928e-50	1.71384e-49
	ENSG00000088325	TPX2	-0.180143	0.157297	0.191056	-0.802725	1.1083e-09	2.24756e-09
	ENSG00000088356	PDRG1	0.143765	0.0837942	0.106899	0.08969	0.312547	0.349033
	ENSG00000088367	EPB41L1	-0.349836	0.000345093	0.000581405	-0.616325	6.4474e-08	1.20547e-07
	ENSG00000088387	DOCK9	0.852474	5.51615e-10	1.41783e-09	-0.00984942	0.944362	0.951329
	ENSG00000088448	ANKRD10	-0.0391395	0.552921	0.599219	-0.271055	0.00010508	0.000163544
	ENSG00000088451	TGDS	-0.101587	0.212903	0.252634	-0.0604415	0.469735	0.508064
	ENSG00000088538	DOCK3	0.102413	0.375023	0.423753	0.389511	0.00139068	0.00200014
	ENSG00000088543	C3orf18	-0.431527	1.6119e-09	4.03488e-09	-0.877886	9.91953e-27	3.42138e-26
	ENSG00000088682	COQ9	-0.348128	3.42638e-08	7.86563e-08	-0.603853	4.83362e-13	1.11704e-12
	ENSG00000088727	KIF9	-0.00548754	0.936574	0.946515	-0.0535693	0.491819	0.529004
	ENSG00000088766	CRLS1	-0.188945	0.00610096	0.00905243	-0.797893	2.64535e-25	8.77987e-25
	ENSG00000088808	PPP1R13B	0.313084	2.41034e-05	4.51418e-05	-0.238193	0.00509739	0.00700388
	ENSG00000088812	ATRN	-0.609396	2.47696e-22	1.15604e-21	-0.721472	8.63869e-27	2.98787e-26
	ENSG00000088826	SMOX	1.15241	2.23793e-25	1.1809e-24	0.557446	2.21466e-07	4.03136e-07
	ENSG00000088827	SIGLEC1	0.0281478	0.807841	0.835506	1.79692	2.16854e-69	1.73576e-68
	ENSG00000088832	FKBP1A	-0.0591082	0.564744	0.610848	0.0120652	0.904579	0.915229
	ENSG00000088833	NSFL1C	0.294759	9.79346e-05	0.000174206	-0.361034	3.31223e-06	5.64703e-06
	ENSG00000088836	SLC4A11	-0.512211	1.28457e-05	2.46004e-05	-0.674387	4.06555e-08	7.67818e-08
	ENSG00000088854	C20orf194	-0.367243	6.30065e-15	2.11802e-14	-0.567288	1.11823e-25	3.75387e-25
	ENSG00000088876	ZNF343	-0.0911813	0.0994813	0.125297	-0.355102	1.41488e-06	2.46536e-06
	ENSG00000088881	EBF4	0.473334	0.0053623	0.00800329	3.48547	1.19346e-55	7.53574e-55
	ENSG00000088882	CPXM1	0.159843	0.122465	0.151689	0.538602	1.17851e-07	2.17384e-07
	ENSG00000088888	MAVS	0.0871728	0.198244	0.236819	0.693064	5.76968e-20	1.65519e-19
	ENSG00000088899	RP5-1187M17.10	0.25661	0.0084075	0.0122918	0.35649	0.00054737	0.000810003
	ENSG00000088926	F11	-0.607803	4.9045e-05	8.94333e-05	-0.62568	0.00012743	0.000197322
	ENSG00000088930	XRN2	0.328858	4.98251e-20	2.11361e-19	0.222729	3.08863e-09	6.14601e-09
	ENSG00000088986	DYNLL1	0.0496395	0.452617	0.501532	-0.764775	8.24893e-25	2.70715e-24
	ENSG00000088992	TESC	-0.434422	0.000751566	0.00122441	-0.219898	0.0926572	0.111871
	ENSG00000089006	SNX5	-0.459346	4.92968e-34	3.50089e-33	-0.489369	7.0518e-24	2.25585e-23
	ENSG00000089009	RPL6	0.0631432	0.449329	0.498221	0.0598938	0.467931	0.506259
	ENSG00000089022	MAPKAPK5	-0.306582	9.93541e-05	0.000176563	-0.57833	1.14511e-13	2.70828e-13
	ENSG00000089041	P2RX7	2.58036	1.31362e-35	9.87795e-35	3.55292	4.63828e-56	2.95239e-55
	ENSG00000089048	ESF1	0.77024	2.22965e-23	1.09318e-22	0.260864	0.00153377	0.00219769
	ENSG00000089050	RBBP9	-0.0434654	0.601404	0.645166	0.771906	5.38802e-18	1.46212e-17
	ENSG00000089053	ANAPC5	-0.526736	1.94592e-39	1.66989e-38	-0.816074	4.43038e-70	3.58846e-69
	ENSG00000089057	SLC23A2	-0.839943	5.32813e-24	2.67912e-23	-2.22678	1.70527e-129	3.10942e-128
	ENSG00000089060	SLC24A6	-0.30593	9.86545e-05	0.000175382	-0.896556	3.16351e-27	1.10957e-26
	ENSG00000089063	TMEM230	-0.135281	0.000453687	0.000755674	-0.0940484	0.0251145	0.0322217
	ENSG00000089091	DZANK1	-0.800611	8.76455e-11	2.37357e-10	-0.915463	2.6254e-13	6.11354e-13
	ENSG00000089094	KDM2B	-0.61765	1.36262e-10	3.64202e-10	-1.40773	2.39011e-36	1.03917e-35
	ENSG00000089101	C20orf26	0.0596963	0.43895	0.48798	0.310176	0.00010442	0.00016255
	ENSG00000089123	TASP1	0.765236	1.42709e-24	7.3286e-24	1.13342	1.93168e-52	1.14115e-51
	ENSG00000089127	OAS1	2.33573	1.00303e-44	1.0348e-43	4.44589	4.94065645841247e-324	6.32404026676796e-322
	ENSG00000089154	GCN1L1	0.464128	2.34952e-15	8.07241e-15	0.301135	2.80767e-07	5.08483e-07
	ENSG00000089157	RPLP0	0.196119	0.0251156	0.0346391	0.14656	0.0948254	0.11435
	ENSG00000089159	PXN	-0.318603	3.98616e-10	1.03417e-09	-0.983443	2.89816e-63	2.10663e-62
	ENSG00000089169	RPH3A	-0.357926	0.000964955	0.00155594	-0.191938	0.0933569	0.11267
	ENSG00000089177	KIF16B	-0.460134	3.94873e-06	7.84551e-06	-0.887036	1.30731e-18	3.60576e-18
	ENSG00000089195	TRMT6	0.299846	0.000122392	0.000215682	-0.613763	5.00919e-12	1.11372e-11
	ENSG00000089220	PEBP1	-0.146714	0.034117	0.0461468	-0.0809513	0.266187	0.300629
	ENSG00000089234	BRAP	0.191474	0.000831915	0.00134972	0.468066	1.81286e-12	4.0995e-12
	ENSG00000089248	ERP29	-0.0685745	0.448443	0.49735	0.225888	0.00888873	0.0119454
	ENSG00000089250	NOS1	0.00299094	0.965722	0.971179	-0.789487	8.41498e-26	2.83252e-25
	ENSG00000089280	FUS	0.676243	1.96672e-42	1.88344e-41	0.636009	1.61022e-33	6.54772e-33
	ENSG00000089289	IGBP1	-0.426079	6.43223e-07	1.35487e-06	-0.377643	1.95393e-05	3.18769e-05
	ENSG00000089327	FXYD5	-0.121228	0.378921	0.427864	0.0868119	0.52707	0.563555
	ENSG00000089335	ZNF302	-0.0362826	0.482801	0.531668	-0.181188	0.000608111	0.000896871
	ENSG00000089351	GRAMD1A	3.3074	1.85041e-156	5.12256e-154	4.59124	0	0
	ENSG00000089356	FXYD3	0.26259	0.00464363	0.00697594	0.109516	0.334254	0.371332
	ENSG00000089472	HEPH	0.322389	0.151519	0.184526	0.224077	0.31898	0.355553
	ENSG00000089486	C16orf5	0.321067	1.99631e-09	4.96718e-09	-0.19961	0.000892847	0.00130128
	ENSG00000089558	KCNH4	-1.25612	1.94196e-41	1.79421e-40	-1.61961	2.68518e-49	1.51963e-48
	ENSG00000089597	GANAB	-0.0179158	0.615294	0.658363	0.304802	3.41108e-18	9.30363e-18
	ENSG00000089639	GMIP	0.183638	2.26481e-06	4.58825e-06	0.0740203	0.0885347	0.107153
	ENSG00000089682	RBM41	-0.181789	0.0682385	0.0882819	-0.307055	0.00494994	0.00680503
	ENSG00000089685	BIRC5	-1.28158	2.28734e-06	4.63264e-06	-2.07437	5.98701e-14	1.43e-13
	ENSG00000089692	LAG3	0.113151	0.472588	0.521305	2.65273	1.29898e-45	6.83887e-45
	ENSG00000089693	MLF2	0.104582	0.0307711	0.0418865	0.0775463	0.135767	0.160435
	ENSG00000089723	OTUB2	-0.181347	0.0847246	0.108049	-1.41254	6.66927e-45	3.47574e-44
	ENSG00000089737	DDX24	0.160638	0.012866	0.0184176	-0.333889	1.33758e-06	2.33312e-06
	ENSG00000089775	ZBTB25	-0.419409	7.73998e-09	1.85395e-08	-0.593797	1.19554e-12	2.72413e-12
	ENSG00000089818	NECAP1	0.139958	0.0361271	0.048694	-0.219374	0.00152742	0.0021888
	ENSG00000089820	ARHGAP4	-0.496738	9.46106e-06	1.82825e-05	-0.177386	0.110242	0.131888
	ENSG00000089847	ANKRD24	0.0711135	0.16418	0.198956	1.68393	9.57276e-59	6.39553e-58
	ENSG00000089876	DHX32	-0.0857479	0.0609256	0.079419	-0.587796	4.53511e-20	1.30553e-19
	ENSG00000089902	RCOR1	-0.0493468	0.456229	0.505198	-0.612117	2.89776e-18	7.9209e-18
	ENSG00000089916	C14orf118	0.314662	1.27729e-08	3.02076e-08	-0.248848	0.000221647	0.000337792
	ENSG00000090006	LTBP4	0.283562	1.86735e-10	4.94072e-10	-0.168977	0.0026452	0.0037221
	ENSG00000090013	BLVRB	0.251504	0.0231922	0.0321495	0.144183	0.175753	0.204423
	ENSG00000090020	SLC9A1	-0.0902545	0.202415	0.241184	-0.918192	2.18277e-43	1.10334e-42
	ENSG00000090054	SPTLC1	0.155281	2.99995e-08	6.90899e-08	0.0130017	0.716241	0.744007
	ENSG00000090060	PAPOLA	0.0517662	0.234615	0.27625	0.0254357	0.576135	0.611338
	ENSG00000090061	CCNK	0.527917	1.46498e-17	5.56142e-17	0.680926	1.80781e-26	6.1975e-26
	ENSG00000090097	PCBP4	-0.148004	0.0725045	0.0933777	0.21095	0.0125949	0.016692
	ENSG00000090104	RGS1	2.62866	3.78702e-57	5.55021e-56	2.57068	2.24427e-39	1.03793e-38
	ENSG00000090238	YPEL3	-1.5582	4.06555e-28	2.35931e-27	-2.01201	2.70189e-37	1.19913e-36
	ENSG00000090263	MRPS33	-0.290362	0.00041746	0.000698289	-0.165785	0.0484695	0.0602725
	ENSG00000090266	NDUFB2	0.0499509	0.578506	0.62351	0.11206	0.226555	0.259158
	ENSG00000090273	NUDC	-0.160168	0.137157	0.168324	-0.320017	0.00271505	0.00381607
	ENSG00000090316	MAEA	-0.511527	1.20865e-18	4.81945e-18	-1.02495	1.71608e-60	1.18462e-59
	ENSG00000090339	ICAM1	2.78359	6.0774e-126	6.48936e-124	3.70041	2.58277e-234	1.52038e-232
	ENSG00000090372	STRN4	0.142341	0.000175305	0.000303913	0.042634	0.292918	0.328856
	ENSG00000090376	IRAK3	0.925381	1.01257e-19	4.23648e-19	-0.124717	0.246751	0.280352
	ENSG00000090382	LYZ	0.192506	0.414004	0.462967	0.615768	0.0135365	0.0178891
	ENSG00000090402	SI	0.484565	0.00151151	0.0023898	0.343038	0.0355762	0.0449118
	ENSG00000090432	MUL1	0.119899	0.00615914	0.00913332	-0.0421342	0.413856	0.452073
	ENSG00000090447	TFAP4	1.43	3.13332e-11	8.70631e-11	2.39616	9.09125e-25	2.98097e-24
	ENSG00000090470	PDCD7	-0.0272349	0.590453	0.63483	-0.200049	0.000511364	0.000758524
	ENSG00000090487	SPG21	-0.374089	3.6099e-22	1.67176e-21	-0.812493	1.56902e-48	8.76684e-48
	ENSG00000090512	FETUB	0.697556	8.81899e-06	1.70859e-05	0.0484485	0.786229	0.80856
	ENSG00000090520	DNAJB11	0.227126	0.000202538	0.000348978	0.562728	1.35411e-18	3.73347e-18
	ENSG00000090530	LEPREL1	0.459356	1.92259e-09	4.78534e-09	1.19873	6.30141e-38	2.83024e-37
	ENSG00000090534	THPO	-1.00951	1.21557e-22	5.75415e-22	-1.2232	2.28639e-24	7.40439e-24
	ENSG00000090539	CHRD	-0.975599	2.38463e-11	6.67311e-11	-1.24632	3.46065e-16	8.88456e-16
	ENSG00000090554	FLT3LG	-0.0734621	0.175715	0.211802	-0.179486	0.00292696	0.00410313
	ENSG00000090565	RAB11FIP3	-0.127553	0.00443009	0.00666722	-0.696635	2.99697e-36	1.30112e-35
	ENSG00000090581	GNPTG	0.137499	0.0141595	0.0201534	0.143052	0.0115374	0.0153489
	ENSG00000090612	ZNF268	-0.245095	3.88768e-09	9.49002e-09	-0.450582	4.47129e-17	1.17806e-16
	ENSG00000090615	GOLGA3	0.389293	8.37767e-16	2.94193e-15	0.375484	5.64265e-12	1.25269e-11
	ENSG00000090621	PABPC4	0.350622	3.87956e-09	9.47175e-09	0.0807106	0.237058	0.270406
	ENSG00000090659	CD209	-0.234659	0.00135055	0.00214849	0.099457	0.188265	0.217892
	ENSG00000090661	CERS4	-0.50829	0.000290108	0.000492262	-0.365793	0.00992253	0.0132869
	ENSG00000090674	MCOLN1	-0.029618	0.631791	0.673605	-0.260258	0.000523303	0.000775386
	ENSG00000090686	USP48	0.288002	1.94325e-06	3.95611e-06	1.66062	5.41379e-183	1.83138e-181
	ENSG00000090776	EFNB1	-0.895967	9.76574e-38	7.90834e-37	-1.36498	1.04885e-72	8.82024e-72
	ENSG00000090857	PDPR	0.214828	0.144401	0.176649	0.240291	0.0970216	0.116876
	ENSG00000090861	AARS	-0.508414	3.44246e-33	2.38026e-32	-0.788708	6.73439e-50	3.83883e-49
	ENSG00000090863	GLG1	-0.600696	3.81087e-38	3.11134e-37	-0.560683	2.0316e-34	8.43321e-34
	ENSG00000090889	KIF4A	-1.09298	1.46699e-06	3.01402e-06	-1.38936	8.78486e-10	1.7927e-09
	ENSG00000090905	TNRC6A	-0.475694	2.4489e-24	1.24689e-23	-0.563369	4.4253e-24	1.42203e-23
	ENSG00000090920	FCGBP	-0.228727	0.271471	0.315864	0.617154	0.0020504	0.00290924
	ENSG00000090924	PLEKHG2	-0.0655862	0.37082	0.41954	-0.063587	0.385201	0.423495
	ENSG00000090971	NAT14	-0.350008	2.70771e-05	5.05148e-05	-0.545266	1.22362e-09	2.47639e-09
	ENSG00000090975	PITPNM2	0.528305	4.02094e-10	1.04302e-09	-0.411773	8.95793e-06	1.49219e-05
	ENSG00000090989	EXOC1	-0.142621	0.000398713	0.000668126	-0.260061	1.71273e-11	3.72761e-11
	ENSG00000091009	RBM27	0.315382	4.25915e-08	9.71913e-08	0.291562	9.95681e-06	1.65379e-05
	ENSG00000091039	OSBPL8	1.22631	7.46408e-56	1.05165e-54	1.16497	1.48541e-40	7.08447e-40
	ENSG00000091073	DTX2	0.695168	6.14466e-15	2.06884e-14	1.08481	1.15781e-34	4.83562e-34
	ENSG00000091106	NLRC4	-2.16788	6.79755e-114	4.93284e-112	-2.60177	6.60369e-133	1.26264e-131
	ENSG00000091127	PUS7	1.38339	3.87795e-39	3.3051e-38	1.1815	1.58398e-27	5.60825e-27
	ENSG00000091128	LAMB4	-0.00136303	0.984642	0.987085	-0.00650006	0.926637	0.935269
	ENSG00000091129	NRCAM	-0.104339	0.0867819	0.110446	0.0654506	0.28841	0.324088
	ENSG00000091136	LAMB1	0.650556	2.70474e-09	6.67765e-09	0.446753	8.72666e-05	0.000136601
	ENSG00000091138	SLC26A3	0.0868548	0.458328	0.507297	0.181491	0.122449	0.145653
	ENSG00000091140	DLD	0.659312	7.01887e-44	7.07042e-43	0.417208	4.88016e-13	1.12744e-12
	ENSG00000091157	WDR7	-0.520249	3.8318e-24	1.94043e-23	-0.666106	3.65915e-34	1.51054e-33
	ENSG00000091164	TXNL1	0.545043	5.37027e-23	2.58634e-22	0.185761	0.000412757	0.000617092
	ENSG00000091262	ABCC6	0.26466	0.00439423	0.00661591	-0.169495	0.0525711	0.0651669
	ENSG00000091317	CMTM6	0.65006	1.04006e-22	4.94052e-22	0.658043	1.73729e-23	5.50104e-23
	ENSG00000091409	ITGA6	1.73609	1.06255e-78	2.96898e-77	2.92412	4.16901e-213	1.91212e-211
	ENSG00000091428	RAPGEF4	1.77175	8.40253e-27	4.67297e-26	3.08684	3.19694e-61	2.23996e-60
	ENSG00000091436	AC013461.1	1.79465	5.88427e-126	6.32834e-124	2.09554	1.10097e-134	2.15468e-133
	ENSG00000091483	FH	0.366062	8.08271e-14	2.5785e-13	0.501641	2.7684e-23	8.71986e-23
	ENSG00000091490	SEL1L3	-0.0523113	0.695927	0.733513	0.818611	2.49141e-08	4.75269e-08
	ENSG00000091513	TF	0.0624019	0.582257	0.627056	-0.448304	0.000229826	0.000349828
	ENSG00000091527	CDV3	0.48903	2.62943e-32	1.76345e-31	0.598494	6.00137e-40	2.81823e-39
	ENSG00000091536	MYO15A	1.4246	5.58894e-27	3.12918e-26	1.30053	2.85806e-20	8.29137e-20
	ENSG00000091542	ALKBH5	-0.183532	3.09425e-05	5.74322e-05	-0.597796	5.74692e-29	2.09529e-28
	ENSG00000091583	APOH	-1.56265	8.59382e-59	1.31493e-57	-1.9377	4.08899e-72	3.41175e-71
	ENSG00000091592	NLRP1	-0.011295	0.905692	0.920783	0.246428	0.0405281	0.0508114
	ENSG00000091622	PITPNM3	-1.09465	2.40311e-15	8.25083e-15	-1.63878	1.77201e-28	6.40132e-28
	ENSG00000091640	SPAG7	0.0341662	0.61158	0.654767	0.0657437	0.316544	0.353048
	ENSG00000091651	ORC6	-0.446938	0.000194226	0.000335342	0.383132	0.00067288	0.000989953
	ENSG00000091656	ZFHX4	1.68132	3.21981e-29	1.94477e-28	2.74531	3.51052e-75	3.06239e-74
	ENSG00000091732	ZC3HC1	0.744058	3.00113e-22	1.39763e-21	0.377981	4.05874e-08	7.66627e-08
	ENSG00000091831	ESR1	-0.829151	2.56255e-18	1.00624e-17	-0.435033	2.61181e-06	4.47431e-06
	ENSG00000091879	ANGPT2	0.582432	5.79285e-07	1.22382e-06	1.56965	8.34604e-28	2.97473e-27
	ENSG00000091947	TMEM101	-0.623325	3.58039e-23	1.73946e-22	-0.601696	1.8825e-16	4.86806e-16
	ENSG00000091986	CCDC80	-0.120349	0.515713	0.563758	1.06075	2.29077e-09	4.58706e-09
	ENSG00000092009	CMA1	-0.115535	0.200307	0.239059	0.0772013	0.471167	0.509539
	ENSG00000092010	PSME1	0.311272	0.000106387	0.000188344	1.00279	3.81409e-35	1.60915e-34
	ENSG00000092020	PPP2R3C	0.0459258	0.588528	0.632943	0.229626	0.00556024	0.00760837
	ENSG00000092036	HAUS4	0.102273	0.0591776	0.0773157	0.734511	1.8734e-40	8.91788e-40
	ENSG00000092051	JPH4	-0.62855	7.48037e-07	1.56704e-06	-0.135494	0.270815	0.305463
	ENSG00000092054	MYH7	-0.24758	0.000786224	0.00127808	-0.0279059	0.727736	0.755161
	ENSG00000092067	CEBPE	-1.36544	1.99316e-22	9.35209e-22	-3.26265	7.29763e-106	9.82125e-105
	ENSG00000092068	SLC7A8	-1.48264	5.14402e-50	6.08851e-49	-2.39297	8.35457e-87	8.62095e-86
	ENSG00000092094	OSGEP	-1.08796	3.19817e-68	6.47824e-67	-1.23584	6.19531e-76	5.45537e-75
	ENSG00000092096	SLC22A17	-0.0839038	0.14182	0.173691	0.0687854	0.209025	0.240485
	ENSG00000092098	RNF31	0.577462	3.22295e-05	5.96876e-05	1.21716	1.10078e-15	2.78585e-15
	ENSG00000092108	SCFD1	-0.0473072	0.248967	0.291837	-0.183646	3.70217e-06	6.2982e-06
	ENSG00000092140	G2E3	-0.220162	0.000104083	0.000184463	-0.406019	1.97287e-12	4.45594e-12
	ENSG00000092148	HECTD1	0.168866	0.0171452	0.0241613	-0.34901	1.73393e-05	2.83931e-05
	ENSG00000092199	HNRNPC	1.07571	2.10287e-116	1.62879e-114	1.55908	1.40324e-234	8.29299e-233
	ENSG00000092200	RPGRIP1	0.951468	3.50022e-16	1.25239e-15	1.20929	8.07743e-27	2.79634e-26
	ENSG00000092201	SUPT16H	0.225675	5.83967e-18	2.25983e-17	0.0515442	0.0678647	0.0832005
	ENSG00000092203	TOX4	0.16078	2.50662e-08	5.80323e-08	0.267718	5.16107e-14	1.23727e-13
	ENSG00000092208	GEMIN2	0.381586	2.03367e-08	4.74205e-08	0.654312	6.46028e-12	1.43187e-11
	ENSG00000092295	TGM1	-0.282492	0.002041	0.00318287	-0.0620435	0.526863	0.563374
	ENSG00000092330	TINF2	0.496448	2.55546e-74	6.2421e-73	1.1385	2.83195e-266	2.20538e-264
	ENSG00000092421	SEMA6A	-0.211215	0.00720385	0.010613	-0.116186	0.175413	0.20406
	ENSG00000092439	TRPM7	-0.0804194	0.299829	0.345978	-0.335769	2.08365e-05	3.39525e-05
	ENSG00000092445	TYRO3	0.834015	4.05625e-13	1.24027e-12	-0.20724	0.0878794	0.106395
	ENSG00000092470	WDR76	-1.11805	1.87806e-23	9.24131e-23	-0.781843	2.0517e-13	4.79854e-13
	ENSG00000092529	CAPN3	-0.961259	1.16629e-07	2.57874e-07	-0.0545815	0.767495	0.791802
	ENSG00000092531	SNAP23	-0.785703	4.3509e-27	2.44333e-26	-0.827661	3.23517e-25	1.07066e-24
	ENSG00000092621	PHGDH	-0.0264748	0.87331	0.893145	0.111688	0.53233	0.568731
	ENSG00000092758	COL9A3	0.0916685	0.281206	0.326378	-0.0869772	0.316621	0.353105
	ENSG00000092820	EZR	0.458088	4.58339e-08	1.04256e-07	0.921828	6.45641e-30	2.40619e-29
	ENSG00000092841	MYL6	0.111762	0.331335	0.379028	0.278385	0.0182107	0.0237328
	ENSG00000092847	EIF2C1	-0.816404	4.02925e-81	1.20708e-79	-1.19197	1.97354e-131	3.68855e-130
	ENSG00000092853	CLSPN	-0.216702	0.147721	0.180341	-0.0203733	0.896308	0.90766
	ENSG00000092871	RFFL	0.420469	5.27075e-07	1.11778e-06	0.436487	2.02461e-06	3.4936e-06
	ENSG00000092929	UNC13D	-0.341767	2.08646e-10	5.5068e-10	-0.505752	8.6749e-18	2.33538e-17
	ENSG00000092931	MFSD11	0.114831	0.0238472	0.0330054	-0.199497	0.000109984	0.000170979
	ENSG00000092964	DPYSL2	-0.410104	2.10035e-07	4.57698e-07	0.174937	0.0436164	0.0544914
	ENSG00000092969	TGFB2	-0.0669331	0.0924347	0.117182	-0.0648479	0.0967417	0.116567
	ENSG00000092978	GPATCH2	0.110309	0.00563311	0.00838656	0.0853281	0.0425938	0.053285
	ENSG00000093000	NUP50	-0.029731	0.429984	0.479152	-0.156828	0.00171668	0.00244945
	ENSG00000093009	CDC45	-0.520613	7.21067e-07	1.51245e-06	-0.275735	0.0160117	0.0210042
	ENSG00000093010	COMT	-0.0054969	0.906561	0.921353	0.379382	7.14368e-14	1.69948e-13
	ENSG00000093072	CECR1	0.0964887	0.185765	0.223034	0.581932	5.82189e-15	1.44097e-14
	ENSG00000093134	VNN3	3.88534	5.02439e-79	1.42253e-77	3.75161	5.95595e-79	5.47684e-78
	ENSG00000093144	ECHDC1	-0.2454	3.38504e-07	7.29044e-07	-0.233859	1.67595e-05	2.74707e-05
	ENSG00000093167	LRRFIP2	1.06424	3.81953e-58	5.76167e-57	1.5237	2.33386e-127	4.17415e-126
	ENSG00000093183	SEC22C	0.190711	2.03662e-06	4.14111e-06	-0.10558	0.0131879	0.0174393
	ENSG00000093217	XYLB	-0.109995	0.175708	0.211802	-1.09519	3.38883e-31	1.30491e-30
	ENSG00000094631	HDAC6	-0.064437	0.0887001	0.112715	0.733115	3.0931e-57	2.00904e-56
	ENSG00000094796	KRT31	-1.21775	6.08283e-41	5.50438e-40	-1.92136	2.5071e-66	1.90575e-65
	ENSG00000094804	CDC6	-0.00878589	0.940726	0.949619	-0.0677661	0.602752	0.63669
	ENSG00000094841	UPRT	-0.107428	0.0329859	0.0447262	-0.468934	8.92107e-14	2.11693e-13
	ENSG00000094880	CDC23	-0.531622	5.96728e-06	1.17051e-05	-1.58522	1.85401e-54	1.14456e-53
	ENSG00000094914	AAAS	-0.809195	2.11534e-49	2.45134e-48	-0.885702	7.79223e-40	3.65348e-39
	ENSG00000094916	CBX5	0.332919	4.83614e-07	1.02941e-06	0.603668	1.01881e-11	2.23821e-11
	ENSG00000094975	C1orf9	0.642967	3.11269e-26	1.69452e-25	0.873676	7.42744e-41	3.56517e-40
	ENSG00000095002	MSH2	-0.111603	0.00643553	0.009529	-0.0310037	0.456481	0.495089
	ENSG00000095015	MAP3K1	-0.0231681	0.790011	0.819902	0.809096	1.86571e-13	4.37311e-13
	ENSG00000095059	DHPS	-0.239666	6.24167e-08	1.40798e-07	-0.178421	5.48301e-05	8.69189e-05
	ENSG00000095066	HOOK2	-0.342662	4.08982e-07	8.75884e-07	0.193112	0.0058725	0.00801147
	ENSG00000095110	FAM55A	-0.0729587	0.645531	0.686542	-0.111968	0.506678	0.5435
	ENSG00000095139	ARCN1	0.288232	2.86112e-20	1.22237e-19	0.641898	1.46876e-52	8.70772e-52
	ENSG00000095203	EPB41L4B	0.156573	0.136189	0.167219	-0.230907	0.0490994	0.0610182
	ENSG00000095209	TMEM38B	1.38013	2.57756e-91	1.03026e-89	1.37206	8.21852e-84	8.14336e-83
	ENSG00000095261	PSMD5	-0.0309369	0.529143	0.576206	0.272861	6.71891e-06	1.1265e-05
	ENSG00000095303	PTGS1	-1.10322	6.41196e-43	6.27306e-42	-1.34908	4.67169e-53	2.80189e-52
	ENSG00000095319	NUP188	0.015802	0.819408	0.845715	0.487869	5.13123e-13	1.18417e-12
	ENSG00000095321	CRAT	-0.792631	1.04243e-34	7.59422e-34	-0.777266	1.73483e-30	6.57021e-30
	ENSG00000095370	SH2D3C	-1.01651	2.62934e-45	2.75639e-44	-0.849251	8.62415e-27	2.98353e-26
	ENSG00000095380	NANS	1.23717	3.10174e-42	2.93468e-41	2.02541	1.75175e-126	3.11441e-125
	ENSG00000095383	TBC1D2	-0.338034	2.45727e-06	4.96603e-06	-2.17166	2.03883e-200	8.26142e-199
	ENSG00000095397	DFNB31	0.0452906	0.744211	0.77777	-0.890032	7.22933e-10	1.48194e-09
	ENSG00000095485	CWF19L1	-0.167598	0.00968083	0.0140654	-0.473214	3.97673e-12	8.86009e-12
	ENSG00000095539	SEMA4G	-0.594664	3.50629e-07	7.54288e-07	-0.792283	1.81182e-08	3.47891e-08
	ENSG00000095564	BTAF1	0.223028	0.0302376	0.0412015	0.627276	1.38706e-08	2.67639e-08
	ENSG00000095574	IKZF5	0.450626	6.29825e-16	2.22425e-15	0.0884101	0.158995	0.185974
	ENSG00000095585	BLNK	0.216146	0.12911	0.159207	0.815877	1.64575e-08	3.16533e-08
	ENSG00000095627	TDRD1	0.121017	0.599106	0.642894	1.15138	1.51454e-06	2.6335e-06
	ENSG00000095637	SORBS1	-0.340838	0.038093	0.0512051	0.307077	0.0513713	0.0637536
	ENSG00000095713	CRTAC1	-0.0885145	0.580768	0.625588	-0.258544	0.129564	0.153737
	ENSG00000095739	BAMBI	2.71207	7.81077e-56	1.09946e-54	3.5479	6.39046e-76	5.62391e-75
	ENSG00000095777	MYO3A	-1.4905	1.36967e-15	4.76723e-15	-2.27233	1.81366e-32	7.20069e-32
	ENSG00000095787	WAC	0.31631	4.05792e-13	1.24053e-12	0.408355	7.52959e-21	2.21925e-20
	ENSG00000095794	CREM	0.840436	6.58695e-19	2.66563e-18	0.906464	6.19641e-22	1.8854e-21
	ENSG00000095906	NUBP2	-0.331651	1.21333e-10	3.25756e-10	-0.525232	7.97522e-19	2.21564e-18
	ENSG00000095917	TPSD1	0.0541886	0.821737	0.847709	0.0608642	0.809972	0.830068
	ENSG00000095932	C19orf77	0.0105006	0.9394	0.948571	0.0397003	0.792369	0.814149
	ENSG00000095951	HIVEP1	0.702335	2.94323e-09	7.2497e-09	0.896576	1.40444e-12	3.19185e-12
	ENSG00000095970	TREM2	-0.895378	7.92118e-12	2.26672e-11	-0.623304	1.14514e-06	2.00634e-06
	ENSG00000096060	FKBP5	0.681514	4.4667e-18	1.73797e-17	2.22402	6.55102e-116	1.02566e-114
	ENSG00000096063	SRPK1	-0.0431591	0.407462	0.456506	-0.384832	6.36125e-12	1.41055e-11
	ENSG00000096070	BRPF3	0.208197	0.0326702	0.0443262	0.481665	2.7708e-06	4.74125e-06
	ENSG00000096080	MRPS18A	-0.161648	0.0168003	0.0236976	0.155177	0.0448658	0.0559727
	ENSG00000096092	TMEM14A	0.0757204	0.389546	0.438426	0.247226	0.00598709	0.00816332
	ENSG00000096093	EFHC1	-0.293877	0.000944021	0.00152317	-0.44011	8.84138e-08	1.64341e-07
	ENSG00000096155	BAG6	0.218854	0.582612	0.627393	0.466579	0.240348	0.273821
	ENSG00000096264	NCR2	0.310005	5.4519e-05	9.90767e-05	0.537167	9.45614e-15	2.32546e-14
	ENSG00000096384	HSP90AB1	0.8396	3.77057e-47	4.13546e-46	-0.0510334	0.493198	0.530258
	ENSG00000096401	CDC5L	0.238493	1.67889e-06	3.43333e-06	0.282705	6.09897e-08	1.14161e-07
	ENSG00000096433	ITPR3	1.44232	6.12258e-40	5.33994e-39	1.14663	3.25035e-30	1.22017e-29
	ENSG00000096654	ZNF184	-0.325283	0.000823366	0.00133628	-0.839739	3.28385e-16	8.4379e-16
	ENSG00000096696	DSP	1.32387	2.20931e-06	4.47944e-06	4.22312	1.47555e-67	1.14195e-66
	ENSG00000096717	SIRT1	0.473135	1.63444e-06	3.34564e-06	0.314389	0.00271252	0.00381288
	ENSG00000096746	HNRNPH3	0.479344	1.38203e-37	1.11195e-36	0.414682	2.98726e-29	1.09582e-28
	ENSG00000096872	IFT74	0.391718	0.00266015	0.00409585	0.396549	0.00323397	0.0045191
	ENSG00000096968	JAK2	0.360675	6.37695e-05	0.000115229	3.12809	3.17593e-296	3.32073e-294
	ENSG00000096996	IL12RB1	-0.376749	1.41051e-08	3.3274e-08	-0.0889841	0.18236	0.211581
	ENSG00000097007	ABL1	-0.792511	6.87419e-20	2.89716e-19	-1.66964	1.34903e-73	1.15064e-72
	ENSG00000097021	ACOT7	-0.0424171	0.674037	0.713156	-0.15036	0.162808	0.190136
	ENSG00000097033	SH3GLB1	0.498324	9.97756e-39	8.37006e-38	0.799416	1.21729e-80	1.15195e-79
	ENSG00000097046	CDC7	-0.90345	2.59773e-13	8.05005e-13	1.09444	3.66779e-19	1.02852e-18
	ENSG00000097096	SYDE2	-0.629752	3.04772e-08	7.01577e-08	-0.486922	0.000116674	0.000181098
	ENSG00000099139	PCSK5	0.563346	7.82216e-09	1.87313e-08	0.359876	8.36529e-05	0.000131095
	ENSG00000099194	SCD	-0.0764184	0.546592	0.593239	-0.501491	0.000249999	0.000379491
	ENSG00000099203	TMED1	0.112092	0.0509091	0.0671526	-0.245198	2.90421e-05	4.69344e-05
	ENSG00000099204	ABLIM1	1.36273	4.88822e-17	1.81731e-16	2.14281	6.9692e-46	3.68993e-45
	ENSG00000099219	ERMP1	-0.390232	4.91721e-07	1.04592e-06	-0.200446	0.00762138	0.0103136
	ENSG00000099246	RAB18	0.946988	1.11731e-100	5.60493e-99	0.665466	1.57974e-53	9.54353e-53
	ENSG00000099250	NRP1	0.266952	0.00138542	0.00220209	-0.0734319	0.392181	0.430408
	ENSG00000099256	PRTFDC1	-0.147106	0.404425	0.453409	0.0709326	0.665564	0.696299
	ENSG00000099282	TSPAN15	-1.83035	5.40371e-53	6.9339e-52	-2.69549	4.31846e-95	5.04056e-94
	ENSG00000099284	H2AFY2	-0.231925	0.0591629	0.07731	0.528801	7.92596e-05	0.00012438
	ENSG00000099290	FAM21A	-0.101768	0.387217	0.436145	-0.270571	0.0164202	0.0215119
	ENSG00000099308	MAST3	-0.297759	0.000128814	0.000226546	-0.120414	0.132629	0.157037
	ENSG00000099326	MZF1	-0.579091	1.85783e-15	6.42738e-15	-1.22205	4.72924e-45	2.46812e-44
	ENSG00000099330	OCEL1	-0.757839	1.19136e-13	3.76128e-13	-0.61964	3.00817e-09	5.99149e-09
	ENSG00000099331	MYO9B	0.0854627	0.19077	0.228511	0.188192	0.00578289	0.00789534
	ENSG00000099337	KCNK6	-1.31779	1.26873e-40	1.13231e-39	-1.62319	2.18878e-59	1.47884e-58
	ENSG00000099338	CATSPERG	0.627073	1.77069e-09	4.4183e-09	-0.00136305	0.989117	0.9904
	ENSG00000099341	PSMD8	0.621554	1.6021e-27	9.14464e-27	0.752667	3.00514e-44	1.54888e-43
	ENSG00000099364	FBXL19	0.0688967	0.288612	0.334247	-0.0459522	0.517067	0.553731
	ENSG00000099365	STX1B	0.0860353	0.341255	0.389332	-0.0134384	0.88817	0.900752
	ENSG00000099377	HSD3B7	-0.197501	0.0329375	0.0446686	-1.54741	2.88335e-47	1.56941e-46
	ENSG00000099381	SETD1A	0.0243331	0.540629	0.587345	-0.668738	7.74613e-37	3.40447e-36
	ENSG00000099385	BCL7C	-0.334785	0.00380839	0.00576873	-0.497386	8.21626e-06	1.37094e-05
	ENSG00000099622	CIRBP	0.155977	0.0595561	0.0777763	0.194842	0.0264395	0.0338461
	ENSG00000099624	ATP5D	-0.346698	0.0243458	0.0336395	-0.600746	9.55049e-05	0.000149137
	ENSG00000099625	C19orf26	0.662192	1.22527e-06	2.53131e-06	-0.212836	0.161717	0.18892
	ENSG00000099749	CYorf15A	-0.805979	4.37934e-11	1.20654e-10	-0.973175	1.48481e-14	3.62462e-14
	ENSG00000099783	HNRNPM	0.742885	3.08938e-29	1.86749e-28	1.33327	5.19396e-83	5.08246e-82
	ENSG00000099785	MARCH2	-0.215068	0.00739044	0.0108804	0.824167	6.90105e-18	1.86456e-17
	ENSG00000099795	NDUFB7	-0.419663	0.00175714	0.00275803	-0.415806	0.00137793	0.00198295
	ENSG00000099797	TECR	-0.0230575	0.598385	0.64225	0.26922	1.81325e-09	3.64706e-09
	ENSG00000099800	TIMM13	0.0203309	0.875089	0.894614	-0.74435	1.15713e-08	2.23792e-08
	ENSG00000099804	CDC34	0.203633	0.0185036	0.0259606	-0.150066	0.0702298	0.0859661
	ENSG00000099810	MTAP	-0.30059	1.89295e-05	3.577e-05	-0.732207	9.44499e-18	2.54041e-17
	ENSG00000099814	KIAA0284	0.812972	2.42315e-23	1.18727e-22	-0.0641277	0.481588	0.519269
	ENSG00000099817	POLR2E	-0.250862	0.00062964	0.0010323	-0.192637	0.0104269	0.0139311
	ENSG00000099821	POLRMT	-0.421987	9.65176e-12	2.75299e-11	-0.664361	7.74656e-18	2.08922e-17
	ENSG00000099822	HCN2	-1.23539	2.56397e-31	1.66286e-30	-1.51088	3.22631e-40	1.52513e-39
	ENSG00000099834	CDHR5	0.117841	0.213548	0.25338	-0.274233	0.0132028	0.0174574
	ENSG00000099840	IZUMO4	0.459278	3.33262e-06	6.66659e-06	0.537819	1.79406e-07	3.27972e-07
	ENSG00000099849	RASSF7	-1.72992	6.77289e-30	4.1838e-29	-2.04103	1.98636e-35	8.44713e-35
	ENSG00000099860	GADD45B	3.40174	2.03762e-103	1.11577e-101	4.2526	1.96754e-178	6.3815e-177
	ENSG00000099866	MADCAM1	-0.195738	0.0004489	0.000747949	0.0133158	0.826245	0.844892
	ENSG00000099875	MKNK2	-0.430883	1.69194e-06	3.45956e-06	-0.687818	2.47996e-13	5.78386e-13
	ENSG00000099889	ARVCF	-0.143829	0.00461358	0.0069315	-0.492398	1.30365e-16	3.39467e-16
	ENSG00000099899	TRMT2A	0.377106	5.75201e-05	0.000104292	-0.641901	1.90813e-12	4.31167e-12
	ENSG00000099901	RANBP1	0.318159	5.72453e-05	0.000103842	-0.121938	0.109785	0.131383
	ENSG00000099904	ZDHHC8	0.10597	0.096751	0.122229	-0.398404	2.12973e-10	4.46742e-10
	ENSG00000099910	KLHL22	-0.999281	2.33505e-24	1.19013e-23	-1.56276	1.68274e-57	1.10063e-56
	ENSG00000099917	MED15	0.670425	7.35923e-59	1.1295e-57	0.89666	2.02792e-111	2.99324e-110
	ENSG00000099937	SERPIND1	0.346214	0.0001588	0.000276131	0.480947	4.24375e-06	7.1901e-06
	ENSG00000099940	SNAP29	-0.504453	2.0408e-21	9.2002e-21	-0.79124	1.72608e-42	8.54296e-42
	ENSG00000099942	CRKL	0.00611485	0.924772	0.936573	-0.144224	0.0494032	0.0613774
	ENSG00000099949	LZTR1	-0.20161	2.13619e-11	5.99809e-11	-0.410019	5.62242e-33	2.26228e-32
	ENSG00000099956	SMARCB1	-0.0923828	0.0726224	0.0935084	-0.134159	0.0143253	0.0188899
	ENSG00000099957	P2RX6	-0.20989	0.0939051	0.118895	-0.307796	0.0154689	0.0203226
	ENSG00000099958	DERL3	0.620977	9.05672e-06	1.75329e-05	1.1515	4.07281e-13	9.43257e-13
	ENSG00000099968	BCL2L13	0.489168	5.9582e-24	2.98589e-23	1.74809	3.01505e-184	1.0316e-182
	ENSG00000099974	DDTL	0.574131	1.0906e-09	2.76001e-09	0.598878	8.51059e-10	1.73815e-09
	ENSG00000099984	GSTT2	-1.1169	1.47173e-10	3.92312e-10	-1.35359	7.98276e-14	1.89729e-13
	ENSG00000099985	OSM	2.71092	1.89996e-64	3.43025e-63	2.16401	2.1021e-43	1.06328e-42
	ENSG00000099991	CABIN1	-0.378771	3.55503e-18	1.38794e-17	0.472683	2.26606e-17	6.02134e-17
	ENSG00000099992	TBC1D10A	0.34121	0.000513556	0.000850183	0.369667	0.000609423	0.000898629
	ENSG00000099995	SF3A1	0.038937	0.249671	0.292571	0.112789	0.00226131	0.00319727
	ENSG00000099998	GGT5	0.287368	0.0142841	0.020319	1.49202	1.12097e-29	4.14973e-29
	ENSG00000099999	RNF215	-0.367391	1.38147e-13	4.34313e-13	-0.77328	1.65648e-46	8.88047e-46
	ENSG00000100003	SEC14L2	0.650163	1.3056e-16	4.77082e-16	0.226417	0.00438898	0.00606282
	ENSG00000100012	SEC14L3	0.0289744	0.86525	0.886783	-0.289075	0.100576	0.120886
	ENSG00000100014	SPECC1L	-0.132729	0.00175035	0.00274824	-0.490823	4.40171e-27	1.53557e-26
	ENSG00000100023	PPIL2	-0.419226	3.87128e-11	1.06992e-10	-0.756946	9.95334e-27	3.43225e-26
	ENSG00000100024	UPB1	3.6743	1.10826e-72	2.60084e-71	4.50313	2.18554e-106	2.96267e-105
	ENSG00000100027	YPEL1	-0.99344	7.7933e-20	3.27898e-19	-0.895684	1.76698e-14	4.30221e-14
	ENSG00000100028	SNRPD3	0.0922154	0.228572	0.269793	-0.103969	0.182013	0.211245
	ENSG00000100029	PES1	0.584502	6.74877e-08	1.5187e-07	0.191543	0.0841267	0.102108
	ENSG00000100030	MAPK1	-0.197157	0.00269994	0.00415241	-0.624843	3.40351e-23	1.07023e-22
	ENSG00000100031	GGT1	0.555145	6.10155e-25	3.17591e-24	0.45178	7.88083e-16	2.0033e-15
	ENSG00000100033	PRODH	0.650199	7.75978e-06	1.51004e-05	0.321216	0.043451	0.0543165
	ENSG00000100034	PPM1F	-1.14534	1.8392e-44	1.88964e-43	-1.56665	4.79354e-75	4.16219e-74
	ENSG00000100036	SLC35E4	-0.125808	0.303356	0.349723	-0.305795	0.00902847	0.0121299
	ENSG00000100038	TOP3B	0.238591	8.97178e-08	2.00118e-07	-0.0245549	0.667646	0.698233
	ENSG00000100055	CYTH4	-0.842021	1.71273e-20	7.4063e-20	0.471946	5.52823e-09	1.08732e-08
	ENSG00000100056	DGCR14	0.40783	5.47117e-07	1.15848e-06	0.429829	6.53887e-07	1.1635e-06
	ENSG00000100060	MFNG	-1.24254	3.07196e-59	4.77367e-58	-1.27542	5.76832e-49	3.24607e-48
	ENSG00000100065	CARD10	-0.793614	4.44032e-08	1.01156e-07	0.230758	0.19001	0.219809
	ENSG00000100068	LRP5L	-0.478452	1.79959e-06	3.67363e-06	-1.09488	2.94132e-21	8.77291e-21
	ENSG00000100075	SLC25A1	0.114017	0.221804	0.262384	-0.104046	0.271109	0.305773
	ENSG00000100077	ADRBK2	-0.458879	1.39193e-13	4.3751e-13	0.49101	1.61397e-12	3.65692e-12
	ENSG00000100079	LGALS2	-0.254922	0.455703	0.504653	0.157892	0.638144	0.670623
	ENSG00000100083	GGA1	-0.400512	8.95535e-16	3.13962e-15	-1.26438	1.12957e-95	1.32778e-94
	ENSG00000100084	HIRA	0.259171	4.21024e-07	9.00284e-07	0.760299	7.14286e-27	2.47681e-26
	ENSG00000100092	SH3BP1	-1.65105	3.40081e-80	9.94886e-79	-2.22835	4.64809e-93	5.22937e-92
	ENSG00000100095	SEZ6L	0.31326	1.83214e-11	5.16281e-11	0.160728	0.000475369	0.000706883
	ENSG00000100097	LGALS1	-0.0280842	0.795292	0.824639	0.0734096	0.508225	0.545081
	ENSG00000100099	HPS4	-0.316528	1.09433e-17	4.17644e-17	-0.627473	9.657e-54	5.86481e-53
	ENSG00000100100	PIK3IP1	-1.24583	5.54656e-25	2.89005e-24	-1.55536	2.91909e-39	1.34669e-38
	ENSG00000100104	SRRD	-0.561397	3.21152e-11	8.91862e-11	-0.980002	1.90923e-28	6.89203e-28
	ENSG00000100105	PATZ1	-0.634095	9.22531e-70	1.96732e-68	-0.581891	1.52103e-44	7.86935e-44
	ENSG00000100106	TRIOBP	-1.02026	7.47763e-27	4.16479e-26	-1.13372	1.18452e-27	4.20388e-27
	ENSG00000100109	TFIP11	-0.315625	3.19707e-18	1.25014e-17	-0.404278	1.43282e-28	5.18603e-28
	ENSG00000100116	GCAT	-0.503835	0.0108395	0.0156605	-0.353172	0.0651457	0.0800715
	ENSG00000100121	GGTLC2	-0.266564	0.128916	0.159006	-0.841113	2.94577e-05	4.7565e-05
	ENSG00000100122	CRYBB1	-0.341722	2.46268e-05	4.60874e-05	-0.122444	0.152691	0.179174
	ENSG00000100124	ANKRD54	-0.328121	2.0313e-05	3.83021e-05	-0.465918	7.38623e-09	1.44252e-08
	ENSG00000100129	EIF3L	-0.0953717	0.216964	0.257147	-0.287436	0.000443127	0.00066045
	ENSG00000100138	NHP2L1	-0.426111	6.06087e-09	1.46135e-08	-0.919521	3.7497e-35	1.58243e-34
	ENSG00000100139	MICALL1	1.46197	3.39528e-133	4.53179e-131	2.14237	1.59501e-262	1.21677e-260
	ENSG00000100142	POLR2F	-0.200972	0.0355475	0.047956	-0.214191	0.0283703	0.0361816
	ENSG00000100147	CCDC134	-0.569949	1.79305e-06	3.66084e-06	-1.0493	1.18014e-14	2.8908e-14
	ENSG00000100150	DEPDC5	-0.183485	0.000318697	0.000538814	-0.235771	2.00466e-05	3.26831e-05
	ENSG00000100151	PICK1	-0.913938	6.23306e-19	2.52583e-18	-1.31993	3.66516e-35	1.54763e-34
	ENSG00000100154	TTC28	-0.515665	1.02366e-06	2.12715e-06	-0.239595	0.0219812	0.0283917
	ENSG00000100162	CENPM	-0.823091	0.000348876	0.000587578	-1.05317	1.74098e-05	2.85054e-05
	ENSG00000100167	SEPT3	-0.867738	9.23907e-11	2.49756e-10	-0.93074	1.35788e-10	2.86321e-10
	ENSG00000100170	SLC5A1	0.432875	0.0330379	0.0447886	0.830713	5.44236e-05	8.63112e-05
	ENSG00000100191	SLC5A4	0.141094	0.177402	0.213646	0.0429576	0.691018	0.720609
	ENSG00000100197	CYP2D6	-0.070109	0.681942	0.72055	0.194971	0.241844	0.275278
	ENSG00000100201	DDX17	-0.562332	1.92024e-24	9.81057e-24	-0.631674	2.65846e-29	9.764e-29
	ENSG00000100207	TCF20	-0.0897064	0.142865	0.174885	-0.0655842	0.307429	0.343811
	ENSG00000100209	HSCB	-0.181076	0.0332522	0.0450627	0.286685	0.0110867	0.014777
	ENSG00000100211	CBY1	-0.897287	9.40293e-25	4.86719e-24	-0.621293	1.74355e-09	3.50964e-09
	ENSG00000100216	TOMM22	-0.0141127	0.869887	0.890425	-0.350858	3.77976e-05	6.06449e-05
	ENSG00000100218	RTDR1	1.3077	1.05996e-19	4.42979e-19	1.37812	2.24784e-20	6.53758e-20
	ENSG00000100219	XBP1	1.87372	3.63492e-122	3.50571e-120	2.93465	0	0
	ENSG00000100220	C22orf28	0.18957	0.00276661	0.00425057	1.76207	7.40414e-162	1.95595e-160
	ENSG00000100221	JOSD1	0.534766	4.86949e-32	3.2425e-31	0.707271	9.80368e-51	5.64874e-50
	ENSG00000100225	FBXO7	-0.00466814	0.878628	0.897479	0.603488	7.36461e-59	4.93129e-58
	ENSG00000100226	GTPBP1	1.15776	5.09408e-53	6.54222e-52	2.52174	1.49226e-186	5.21314e-185
	ENSG00000100227	POLDIP3	0.154748	1.11745e-10	3.00608e-10	0.270717	1.79676e-15	4.52047e-15
	ENSG00000100228	RAB36	1.24389	2.29481e-21	1.03204e-20	0.656801	5.65746e-07	1.00967e-06
	ENSG00000100234	TIMP3	0.121807	0.646985	0.687893	-1.11909	5.6722e-05	8.98514e-05
	ENSG00000100239	PPP6R2	0.0711493	0.347707	0.395907	-0.0577217	0.445314	0.48354
	ENSG00000100241	SBF1	0.62403	6.23797e-29	3.72558e-28	0.462979	1.05732e-15	2.67678e-15
	ENSG00000100242	SUN2	0.186222	0.0757185	0.0972186	0.668245	6.61825e-13	1.52123e-12
	ENSG00000100243	CYB5R3	0.458979	8.38844e-26	4.49297e-25	0.590297	7.43784e-35	3.12039e-34
	ENSG00000100246	DNAL4	-0.748889	7.10136e-35	5.20638e-34	-0.720437	3.61491e-20	1.04465e-19
	ENSG00000100258	LMF2	0.139558	0.0282314	0.0386404	0.212425	0.000949598	0.00138117
	ENSG00000100263	RHBDD3	0.0205468	0.769665	0.801377	-0.223359	0.00204038	0.00289557
	ENSG00000100266	PACSIN2	-0.186793	1.18073e-05	2.26611e-05	-0.990075	2.68539e-91	2.92653e-90
	ENSG00000100271	TTLL1	-1.27615	1.29773e-32	8.79012e-32	-1.721	2.615e-43	1.31826e-42
	ENSG00000100276	RASL10A	-0.553477	1.21935e-13	3.84883e-13	-0.772821	1.36155e-20	3.98237e-20
	ENSG00000100280	AP1B1	-0.908218	6.91771e-63	1.19691e-61	-0.809082	1.86209e-46	9.95776e-46
	ENSG00000100281	HMGXB4	0.162742	0.0615496	0.0801695	0.210682	0.0184907	0.024083
	ENSG00000100284	TOM1	0.61226	4.78449e-13	1.45758e-12	0.664171	5.41796e-15	1.3421e-14
	ENSG00000100285	NEFH	-0.758556	5.30111e-12	1.52985e-11	-0.764244	5.13506e-11	1.0981e-10
[truncated: 12,957 more rows]
