# Supplementary material for: Widespread Shortening of 3’ Untranslated Regions and Increased Exon Inclusion Are Evolutionarily Conserved Features of Innate Immune Responses to Infection
Source: PLoS Genet. 2016 Sep 30;12(9):e1006338. doi: 10.1371/journal.pgen.1006338 (PMC5045211; doi:10.1371/journal.pgen.1006338)
Supplement: S7 Table — A summary of the proportion of annotated events that were detected and determined to be significant (according to the criteria defined in Supplementary Section 1.3.5 in S1 Text) for each condition and RNA processing category. Included are tables for metrics after both 2 hours of infection and 24 hours of infection. (XLSX) [file pgen.1006338.s023.xlsx]

## Sheet: 2hr MISO stats
	Supplementary Table S7: Summaries of Significant RNA Processing Events (2hr)
		Type of Exon	Number of Annotated Events	Number of Events Detected in 90% of Individuals (n >= 54)	Number of Significant Events	% Significant
	Listeria-Noninfected	AFE	19720	6916	265	3.83169
		ALE	10267	5992	267	4.45594
		RI	5987	2877	211	7.33403
		SE	39222	13483	213	1.57977
		TandemUTR	2656	1875	142	7.57333
	Salmonella-Noninfected	AFE	19720	6120	416	6.79739
		ALE	10267	5699	466	8.17687
		RI	5987	2404	336	13.9767
		SE	39222	11865	406	3.42183
		TandemUTR	2656	1757	293	16.6762

## Sheet: 24hr MISO stats
	Supplementary Table S7: Summaries of Significant RNA Processing Events (2hr and 24hr)
		Type of Exon	Number of Annotated Events	Number of Events Detected in 100% of Individuals at both timepoints (n = 6)	Number of Significant Events at 2hr	% Significant at 2hr	Number of Significant Events at 24hr	% Significant at 24hr
	Listeria-Noninfected	AFE	19720	4661	55	1.18	495	10.62
		ALE	10267	5244	114	2.17391	1131	21.5675
		RI	5987	2540	45	1.77165	363	14.2913
		SE	39222	12154	42	0.345565	828	6.81257
		TandemUTR	2656	1699	41	2.41318	287	16.8923
	Salmonella-Noninfected	AFE	19720	4308	133	3.08728	396	9.1922
		ALE	10267	5124	238	4.64481	1002	19.555
		RI	5987	2287	102	4.45999	356	15.5662
		SE	39222	11101	102	0.918836	787	7.08945
		TandemUTR	2656	1698	139	8.1861	220	12.9564
